# Supplementary material for: Recurrent neural network (RNN) model accelerates the development of antibacterial metronidazole derivatives
Source: Royal Society of Chemistry journal article supplement (doi:10.1039/d2ra01807a), 2022-01-01
Supplement: d2ra01807a2.xlsx [file d2ra01807a2.xlsx]

## Sheet: Sheet1
Structure	SMILES	Name
	Cc1ncc([N+]([O-])=O)n1CCSc(n2N)nnc2-c3ccccc3	Mol_0001
	Cc1ncc([N+]([O-])=O)n1CCSc(n2N)nnc2-c3ccccc3	Mol_0002
	Cc1ncc([N+]([O-])=O)n1CCSc(n2N)nnc2-c3ccc(N)cc3	Mol_0003
	Cc1ncc([N+]([O-])=O)n1CCSc(n2N)nnc2-c3ccc(Cl)cc3	Mol_0004
	[O-][N+](=O)c1cnc(SC)n1CCSc(n2N)nnc2-c3ccccc3	Mol_0005
	CC(C)(C)c1ccc(cc1)-c2nnc(n2N)SCCn3c([N+]([O-])=O)cnc3C	Mol_0006
	Cc1ncc([N+]([O-])=O)n1CCSc(n2N)nnc2-c3cc(Cl)ccc3	Mol_0007
	Cc1ncc([N+]([O-])=O)n1CCSc(n2N)nnc2-c3cc(Cl)ccc3	Mol_0008
	Cc1ncc([N+]([O-])=O)n1CCSc(n2N)nnc2-c3ccc(S(=O)(=O)Cl)cc3	Mol_0009
	Cc1ncc([N+]([O-])=O)n1CCSc(n2N)nnc2-c3c(Cl)cccc3	Mol_0010
	Cc1ncc([N+]([O-])=O)n1CCSCc2cc(ccc2)CSc(n3N)nnc3-c4ccccc4	Mol_0011
	Cc1ncc([N+]([O-])=O)n1CC(O)CSc(n2N)nnc2-c3ccccc3	Mol_0012
	Cc1ncc([N+]([O-])=O)n1CCSc(n2N)nnc2-c(c3)ccc(c34)OCCO4	Mol_0013
	[O-][N+](=O)c1cnc(Cl)n1CCSc(n2N)nnc2-c(cc3C)ccc3	Mol_0014
	CC(C)c1ccc(cc1)-c2nnc(n2N)SCCn3c(Cl)ncc3[N+]([O-])=O	Mol_0015
	Cc1ncc([N+]([O-])=O)n1CCSc2ccccc2	Mol_0016
	Cc1ncc([N+]([O-])=O)n1CCSc(o2)nnc2-c3ccccc3	Mol_0017
	c1nc(N)c(OC(F)F)cc1-c2nnc(n2N)SCCn3c([N+]([O-])=O)cnc3C	Mol_0018
	Cc1ncc([N+]([O-])=O)n1CCSc(n2N)nnc2-c3c(Cl)cc(Cl)c(F)c3	Mol_0019
	Cc1ncc([N+]([O-])=O)n1CCSC(=S)N2CCN(CC2)c(n3N)nnc3-c4ccccc4	Mol_0020
	c1ccccc1-c2nnc(n2N)SCC(=O)OC3CCN(CC3)C(=S)SCCn4c([N+]([O-])=O)cnc4C	Mol_0021
	n1cc([N+]([O-])=O)n(c1C)CCSc(n(c2=O)N)nc(c23)scc3-c4ccccc4	Mol_0022
	Cc1ncc([N+]([O-])=O)n1CCSc(c2N)cccc2	Mol_0023
	c1ccccc1-c2nnc(n2N)SCC(=O)OC(C3C)CCN(C3)C(=S)SCCn4c([N+]([O-])=O)cnc4C	Mol_0024
	c1ccccc1C(c2ccccc2)SCCn3c([N+]([O-])=O)cnc3C	Mol_0025
	CC1CCCN(C1)C(=O)c2c(cccc2)-c3nnc(n3N)SCCn4c([N+]([O-])=O)cnc4C	Mol_0026
	Cc1ncc([N+]([O-])=O)n1CCSc(o2)nnc2-c3cccnc3	Mol_0027
	Cc1ncc([N+]([O-])=O)n1CCSc(o2)nnc2-c3cccnc3	Mol_0028
	Cc1ncc([N+]([O-])=O)n1CCCSc(n(c2=O)N)nc(c23)cccc3	Mol_0029
	Cc1ncc([N+]([O-])=O)n1CCSCc2ccccc2	Mol_0030
	c1cccc(c1C=O)SCCn2c([N+]([O-])=O)cnc2C	Mol_0031
	Cc1ncc([N+]([O-])=O)n1CCSc(o2)nnc2-c3cc(c(N)nc3)-c4ccccc4	Mol_0032
	Cc1ncc([N+]([O-])=O)n1CCSc(o2)nnc2-c3cc(N)ccc3	Mol_0033
	c1cc(C)ccc1C(c2ccccc2)SCCn3c([N+]([O-])=O)cnc3C	Mol_0034
	Cc1ncc([N+]([O-])=O)n1CCSc(o2)nnc2-c(cc3C)ccc3	Mol_0035
	Cc1ncc([N+]([O-])=O)n1CCSc(o2)nnc2-c(cc3)ccc3C	Mol_0036
	Cc1ncc([N+]([O-])=O)n1CCSc(o2)nnc2-c(cc3)ccc3C	Mol_0037
	Cc1ncc([N+]([O-])=O)n1CCSCCn2c([N+]([O-])=O)cnc2C	Mol_0038
	Cc1ncc([N+]([O-])=O)n1CCSc(o2)nnc2-c(c3C)cccc3	Mol_0039
	Cc1ncc([N+]([O-])=O)n1CCSc(o2)nnc2-c3ccc(N)cc3	Mol_0040
	Cc1ncc([N+]([O-])=O)n1CCSc(o2)nnc2-c(c3C)cccc3	Mol_0041
	Cc1ncc([N+]([O-])=O)n1CCSc(o2)nnc2-c3c(N)cccc3	Mol_0042
	Cc1ncc([N+]([O-])=O)n1CCSc(o2)nnc2-c3c(N)cccc3	Mol_0043
	Cc1ncc([N+]([O-])=O)n1CCSc2ccc(Cl)cc2	Mol_0044
	Cc1ncc([N+]([O-])=O)n1CCSc(o2)nnc2-c3ccccn3	Mol_0045
	Cc1ncc([N+]([O-])=O)n1CCSc(o2)nnc2-c3cc(Cl)ccc3	Mol_0046
	Cc1ncc([N+]([O-])=O)n1CCSc(o2)nnc2-c(c3)ccc(c34)cccc4	Mol_0047
	Cc1ncc([N+]([O-])=O)n1CCSc(o2)nnc2-c3cc(F)ccc3	Mol_0048
	n1cc([N+]([O-])=O)n(c1C)CCSc(o2)nnc2-c3ccc(N)n3N	Mol_0049
	Cc1ncc([N+]([O-])=O)n1CCS(=O)(C)=NC(=O)CSc(n2N)nnc2-c3c(F)cccc3	Mol_0050
	c1cc(Cl)ccc1C(c2ccccc2)SCCn3c([N+]([O-])=O)cnc3C	Mol_0051
	COC(=O)c1c(cccc1)SCCn2c([N+]([O-])=O)cnc2C	Mol_0052
	Cc1ncc([N+]([O-])=O)n1CCSc(o2)nnc2-c3ccncc3	Mol_0053
	Cc1ncc([N+]([O-])=O)n1CCSc(o2)nnc2-c3ccc([N+]([O-])=O)cc3	Mol_0054
	c1cc(Cl)ccc1C(c2ccccc2)SCCn3c([N+]([O-])=O)cnc3C	Mol_0055
	c1cc(Cl)ccc1-c2nnc(n2N)SCC(=O)OC3CCN(CC3)C(=S)SCCn4c([N+]([O-])=O)cnc4C	Mol_0056
	Cc1ncc([N+]([O-])=O)n1CCSc(o2)nnc2-c3c(O)cccc3	Mol_0057
	Cc1ncc([N+]([O-])=O)n1CCSc(o2)nnc2-c3c([N+]([O-])=O)cccc3	Mol_0058
	Cc1ncc([N+]([O-])=O)n1CCSc(o2)nnc2-c3ccc(N)nc3	Mol_0059
	Cc1ncc([N+]([O-])=O)n1CCSc(o2)nnc2-c3ccc(N)nc3	Mol_0060
	Cc1ncc([N+]([O-])=O)n1CCSc(o2)nnc2-c3cc(OC)ccc3	Mol_0061
	Cc1ncc([N+]([O-])=O)n1CCSc(o2)nnc2-c3c([N+](=O)[NH-])cccc3	Mol_0062
	Cc1ncc([N+]([O-])=O)n1CCSc(c2)ccc(Cl)c2Cl	Mol_0063
	Cc1ncc([N+]([O-])=O)n1CCSc(o2)nnc2-c3ccc(Cl)cc3	Mol_0064
	n1cc([N+]([O-])=O)n(c1C)CCSc(o2)nnc2-c3ccco3	Mol_0065
	c1cccc(Cl)c1C(c2ccccc2)SCCn3c([N+]([O-])=O)cnc3C	Mol_0066
	Cc1ncc([N+]([O-])=O)n1CCSc(o2)nnc2-c3ccc(F)cc3	Mol_0067
	c1ccc(C)cc1C(c2ccccc2)SCCn3c([N+]([O-])=O)cnc3C	Mol_0068
	c1ccc(C)cc1C(c2ccccc2)SCCn3c([N+]([O-])=O)cnc3C	Mol_0069
	Cc1ncc([N+]([O-])=O)n1CCSc(o2)nnc2-c3c(Cl)cccc3	Mol_0070
	Cc1ncc([N+]([O-])=O)n1CCSc(o2)nnc2-c3c(F)cccc3	Mol_0071
	CC(N)c1ccc(cc1)-c2nnc(o2)SCCn3c([N+]([O-])=O)cnc3C	Mol_0072
	CC(N)c1ccc(cc1)-c2nnc(o2)SCCn3c([N+]([O-])=O)cnc3C	Mol_0073
	O=C(O)c1ccc(cc1)-c2nnc(o2)SCCn3c([N+]([O-])=O)cnc3C	Mol_0074
	Cc1ncc([N+]([O-])=O)n1CCSc(o2)nnc2-c3c(OCC)cccc3	Mol_0075
	Cc1ncc([N+]([O-])=O)n1CCSc(o2)nnc2-c3cc(ccc3)OCC	Mol_0076
	Cc1ncc([N+]([O-])=O)n1CCSc(nn2)cc(N)c2-c3cc(OC)ccc3	Mol_0077
	CCS(=O)(=O)CCSc(n1N)nnc1-c2ccccc2	Mol_0078
	Cc1ncc([N+]([O-])=O)n1CCSc(c2N)ccc(Cl)c2	Mol_0079
	c1ccccc1NC(=S)SCCn2c([N+]([O-])=O)cnc2C	Mol_0080
	CC(C)c1ccc(cc1)-c2nnc(o2)SCCn3c([N+]([O-])=O)cnc3C	Mol_0081
	CC(C)(C)c1ccc(cc1)-c2nnc(o2)SCCn3c([N+]([O-])=O)cnc3C	Mol_0082
	c1cccc(F)c1C(c2ccccc2)SCCn3c([N+]([O-])=O)cnc3C	Mol_0083
	Cc1ncc([N+]([O-])=O)n1CCSc(o2)nnc2-c3cc(N)ncc3	Mol_0084
	Cc1ncc([N+]([O-])=O)n1CCSc(o2)nnc2-c3cccc(c34)cccc4	Mol_0085
	Cc1ncc([N+]([O-])=O)n1CCSc(nn2)oc(=O)c2-c3c(OCC)cccc3	Mol_0086
	Cc1ncc([N+]([O-])=O)n1CCSc2nnc(c(N)c2C)-c3c(N)n(nn3)Cc4ccccc4	Mol_0087
	c1ccccc1CCSc(n2N)nnc2-c3ccccc3	Mol_0088
	Cc1ncc([N+]([O-])=O)n1CCSCc2c(Cl)cccc2	Mol_0089
	Cc1ncc([N+]([O-])=O)n1CCSc(o2)nnc2-c3ccc(cc3)N(C)C	Mol_0090
	c1ccc(Cl)cc1C(c2ccccc2)SCCn3c([N+]([O-])=O)cnc3C	Mol_0091
	Cc1ncc([N+]([O-])=O)n1CCSc(o2)nnc2-c3ccc(cc3)OC	Mol_0092
	c1ccc(F)cc1C(c2ccccc2)SCCn3c([N+]([O-])=O)cnc3C	Mol_0093
	c1cccc(c12)cccc2C(c3ccccc3)SCCn4c([N+]([O-])=O)cnc4C	Mol_0094
	Cc1ncc([N+]([O-])=O)n1CCSc(o2)nnc2-c3cc(Cl)cnc3	Mol_0095
	CC(C)OC(=O)c1c(cccc1)SCCn2c([N+]([O-])=O)cnc2C	Mol_0096
	c1ccc(C)c(C)c1C(c2ccccc2)SCCn3c([N+]([O-])=O)cnc3C	Mol_0097
	c1ccc(Cl)cc1C(c2ccccc2)SCCn3c([N+]([O-])=O)cnc3C	Mol_0098
	Cc1ncc([N+]([O-])=O)n1CCSc(o2)nnc2-c3c(OC)cccc3	Mol_0099
	Cc1ncc([N+]([O-])=O)n1CCSc(o2)nnc2-c3c(N)ccnc3	Mol_0100
	Cc1ncc([N+]([O-])=O)n1CCSc(o2)nnc2-c3c(N(C)C)cccc3	Mol_0101
	CC(C)NC(=O)CSc(n1N)nnc1-c2c(F)cccc2.CN(C)C(=S)SCCn3c([N+]([O-])=O)cnc3C	Mol_0102
	n1cc([N+]([O-])=O)n(c1C)CCSc(o2)nnc2-c3cccs3	Mol_0103
	Cc1ncc([N+]([O-])=O)n1CCSc(nc(c23)scc2)n(c3=O)-c(c4N)cccc4	Mol_0104
	c1ccccc1C(c2ccccc2)S(=O)(=O)CCn3c([N+]([O-])=O)cnc3C	Mol_0105
	Cc1ncc([N+]([O-])=O)n1CCSc(o2)nnc2-c3ccc(cc3)OCC	Mol_0106
	c1ccccc1OCCSc(n2N)nnc2-c3ccccc3	Mol_0107
	ClC(Cl)(Cl)c1ccc(cc1)-c2nnc(o2)SCCn3c([N+]([O-])=O)cnc3C	Mol_0108
	Cc1ncc([N+]([O-])=O)n1CCSc(o2)nnc2-c3cc(OC)c(cc3)OC	Mol_0109
	c1ccccc1Cn2c([N+]([O-])=O)cnc2C	Mol_0110
	Cc1ncc([N+]([O-])=O)n1CCSc(o2)nnc2-c3cc(O)c(N)cc3	Mol_0111
	Cc1ncc([N+]([O-])=O)n1CCSc(o2)nnc2-c3cccc(C)c3C	Mol_0112
	Cc1ncc([N+]([O-])=O)n1CCS(=O)(=O)c2ccccc2	Mol_0113
	c1ccccc1OCCSc(n2N)nnc2-c3ccccc3	Mol_0114
	Cc1ncc([N+]([O-])=O)n1CCSc(cc2)cc3n(CC)c(c4c23)cccc4	Mol_0115
	CCSc(n1N)nnc1-c2ccccc2	Mol_0116
	Cc1ncc([N+]([O-])=O)n1CCSC(=S)N2CCN(CC2)c3ccccc3	Mol_0117
	Cc1ncc([N+]([O-])=O)n1CCSC(=S)N2CCN(CC2)c(n3N)nnc3-c4c(Cl)cccc4	Mol_0118
	Cc1ncc([N+]([O-])=O)n1CCSC(=S)N2CCN(CC2)c(n3)nc(N)nc3-c4ccccc4	Mol_0119
	n1cc([N+]([O-])=O)n(c1C)CCSc(n(c2=O)N)nc3sc(c4c23)CCCC4	Mol_0120
	n1cc([N+]([O-])=O)n(c1C)CCSc(n(c2=O)N)nc(c2c34)sc3CCC4	Mol_0121
	Cc1ncc([N+]([O-])=O)n1CCSc(o2)nnc2-c3ccnc(c34)cccc4	Mol_0122
	Cc1ncc([N+]([O-])=O)n1CCSc(o2)nnc2-c3cncc(c34)cccc4	Mol_0123
	n1cc([N+]([O-])=O)n(c1C)CCSc2c(O)n(-c3ccccc3)nc2Sc4ccccc4	Mol_0124
	Cc1ncc([N+]([O-])=O)n1CCSc(o2)nnc2-c3cc(Cl)ncc3	Mol_0125
	Cc1ncc([N+]([O-])=O)n1CCSc(o2)nnc2-c3cc(Cl)c(N)nc3	Mol_0126
	Cc1ncc([N+]([O-])=O)n1CCSc(o2)nnc2-c3cc(OC)cc(c3)OC	Mol_0127
	c1cc(Cl)ccc1C(c2ccc(Cl)cc2)SCCn3c([N+]([O-])=O)cnc3C	Mol_0128
	Cc1ncc([N+]([O-])=O)n1CCSc(o2)nnc2-c3cc(ccc3)S(=O)(=O)N(CC)CC	Mol_0129
	n1cc([N+]([O-])=O)n(c1C)CCSc(o2)nnc2-c(c3)[nH]c(c34)cccc4	Mol_0130
	CCCOc(cccc1)c1-c2nnc(o2)SCCn3c([N+]([O-])=O)cnc3C	Mol_0131
	Cc1ncc([N+]([O-])=O)n1CCSc(o2)nnc2-c(c(O)c3C)ccc3	Mol_0132
	c1ccc(C)c(c1C)NC(=O)c2c(cccc2)SCCn3c([N+]([O-])=O)cnc3C	Mol_0133
	Cc1cc([N+]([O-])=O)n(c1)CCSc(n2N)nnc2-c3cc(OC)cc(c3)OC	Mol_0134
	COc(cc1)ccc1OCCSc(n2N)nnc2-c3ccccc3	Mol_0135
	Cc1ncc([N+]([O-])=O)n1CCS(=O)(=O)Cc2ccccc2	Mol_0136
	c1ccccc1-c2nnc(n2N)Sc(cc3)ccc3[N+]([O-])=O	Mol_0137
	c1ccccc1CCSc(n2N)nnc2-c(cc3)ccc3C	Mol_0138
	O=C(O)CSc(n1N)nnc1-c2ccccc2	Mol_0139
	CN(C)C(=S)SCCn1c([N+]([O-])=O)cnc1C.S2CC(=O)Nn(c23)c(nn3)-c4ccccc4	Mol_0140
	Cc1ncc([N+]([O-])=O)n1CCSc(o2)nnc2-c(c3)ccc(c34)OCCO4	Mol_0141
	FC(F)Oc(cc1)ccc1-c2nnc(o2)SCCn3c([N+]([O-])=O)cnc3C	Mol_0142
	n1cc([N+]([O-])=O)n(c1C)CCSc(o2)nnc2-c(c3)ccc(c34)OCO4	Mol_0143
	Cc1ncc([N+]([O-])=O)n1CCSc(o2)nnc2-c3cc(Cl)c(F)cc3	Mol_0144
	Cc1ncc([N+]([O-])=O)n1CCSc(nn2)cc(N)c2-c(cc3OC)cc(OC)c3OC	Mol_0145
	FC(F)COc(cc1)ccc1-c2nnc(o2)SCCn3c([N+]([O-])=O)cnc3C	Mol_0146
	c1c(Cl)ccc(O)c1C(c2ccccc2)SCCn3c([N+]([O-])=O)cnc3C	Mol_0147
	Cc1ncc([N+]([O-])=O)n1CCSc(o2)nnc2-c3cc(OC)c(OC)c(c3)OC	Mol_0148
	c1cc(S(=O)(=O)Cl)ccc1OCCSc(n2N)nnc2-c3ccccc3	Mol_0149
	c1ccccc1CCS(=O)(=O)CCn2c([N+]([O-])=O)cnc2C	Mol_0150
	Cc1ncc([N+]([O-])=O)n1CCSCc2ccc(Cl)cc2	Mol_0151
	CCN(CC)C(=O)SCCn1c([N+]([O-])=O)cnc1C	Mol_0152
	Cc1ncc([N+]([O-])=O)n1CCSCc2ncc([N+]([O-])=O)n2C	Mol_0153
	Cc1ncc([N+]([O-])=O)n1CCSc(cc2)ccc2-c(nn3)n(c34)N=C(CS4)c5cc(O)ccc5	Mol_0154
	ONC(=O)CSc(n1N)nnc1-c2ccccc2	Mol_0155
	Cc1ncc([N+]([O-])=O)n1CCSc(o2)nnc2-c3c(O)c(ccc3)OCC	Mol_0156
	O1CCOc(c12)ccc(c2)C(c3ccccc3)SCCn4c([N+]([O-])=O)cnc4C	Mol_0157
	CC(C)c1c(Cl)cc(cc1)-c2nnc(o2)SCCn3c([N+]([O-])=O)cnc3C	Mol_0158
	Cc1ncc([N+]([O-])=O)n1CCSc(o2)nnc2-c3cccc(c34)cccc4Cl	Mol_0159
	Cc1ncc([N+]([O-])=O)n1CCSc(o2)nnc2-c(cc3)c(O)cc3C	Mol_0160
	Cc1ncc([N+]([O-])=O)n1CCSC(=S)N(CC2)CCC2c3ccccc3	Mol_0161
	c1ccccc1NC(=S)OCCn2c([N+]([O-])=O)cnc2C	Mol_0162
	Cc1ncc([N+]([O-])=O)n1CCSc(c(c2)O)n(C)c(=O)c2C	Mol_0163
	Cc1ncc([N+]([O-])=O)n1CCSC(c2ccccc2)c3cc(ccc3)OCCSc(o4)nnc4-c5ccccc5	Mol_0164
	CN(C)C(=S)SCCn1c([N+]([O-])=O)cnc1C	Mol_0165
	Cc1ncc([N+]([O-])=O)n1CCSc(o2)nnc2-c3c(OC)c(ccc3)OCC	Mol_0166
	Cc1ncc([N+]([O-])=O)n1CCSc(nn2)cc(-n3cccc3)c2-c4cc(OC)c(cc4)OC	Mol_0167
	CCOC(=O)CSc(n1N)nnc1-c2ccccc2	Mol_0168
	Cc1ncc([N+]([O-])=O)n1CCSc(o2)nnc2-c3c(OC)c(OC)ccc3	Mol_0169
	C=C(C)CSc(n1N)nnc1-c2ccccc2	Mol_0170
	Cc1ncc([N+]([O-])=O)n1CCSc(o2)nnc2-c(c3O)ccc(C)c3C	Mol_0171
	Cc1ncc([N+]([O-])=O)n1CCSc(o2)nnc2-c3cc(Cl)c(nc3)OC	Mol_0172
	Cc1ncc([N+]([O-])=O)n1CCSc(o2)nnc2-c3c(Cl)cc(Cl)cc3	Mol_0173
	Cc1ncc([N+]([O-])=O)n1CCSc(o2)nnc2-c3c(Cl)ccnc3	Mol_0174
	c1ccccc1CSc(n2N)nnc2-c3ccccc3	Mol_0175
	n1cc([N+]([O-])=O)n(c1C)CCSc(o2)nnc2-c(no3)cc3C	Mol_0176
	Cc1ncc([N+]([O-])=O)n1CCSc(nc(c23)sc(C)c2C)n(c3=O)-c4c(OC)cccc4	Mol_0177
	C=C(C)CSc(n1N)nnc1-c2ccc([N+]([O-])=O)cc2	Mol_0178
	c1cc(Cl)ccc1OCCSc(n2N)nnc2-c3ccccc3	Mol_0179
	Cc1ncc([N+]([O-])=O)n1CCSc(o2)nnc2-c3c(O)c(OC)ccc3	Mol_0180
	c1ccccc1CCSc(n2N)nnc2-c(cc3C)ccc3	Mol_0181
	Cc1ncc([N+]([O-])=O)n1CCSC(=S)N(CC2)CCC2(O)c3ccccc3	Mol_0182
	Cc1ncc([N+]([O-])=O)n1CCSC(=S)N2CCN(CC2)c3ccccn3	Mol_0183
	Cc1ncc([N+]([O-])=O)n1CCSc(o2)nnc2-c3c(Cl)cc(Cl)c(F)c3	Mol_0184
	Cc1ncc([N+]([O-])=O)n1CCSc(o2)nnc2-c3c(N)c(Cl)cnc3	Mol_0185
	c1cccc(c12)N(SCC2=O)C(=S)SCCn3c([N+]([O-])=O)cnc3C	Mol_0186
	Cc1ncc([N+]([O-])=O)n1CCSC(=S)N(C2)CCC2c3ccccc3	Mol_0187
	Cc1ncc([N+]([O-])=O)n1CCSc(o2)nnc2-c3c(N)cc(Cl)nc3	Mol_0188
	c1cc(F)ccc1C(c2ccc(Cl)cc2)SCCn3c([N+]([O-])=O)cnc3C	Mol_0189
	c1cc(Cl)ccc1C(c2ccccc2)S(=O)(=O)CCn3c([N+]([O-])=O)cnc3C	Mol_0190
	Cc(c1)cnc(c1C)NC(=O)CSc(n2N)nnc2-c3ccccc3	Mol_0191
	Cc1ncc([N+]([O-])=O)n1CCS(=O)(=O)CCn2c([N+]([O-])=O)cnc2C	Mol_0192
	N#CCSc(n1N)nnc1-c2ccccc2	Mol_0193
	CCN(CC)C(=S)SCCn1c([N+]([O-])=O)cnc1C	Mol_0194
	C1CCCN1C(=O)SCCn2c([N+]([O-])=O)cnc2C	Mol_0195
	CC(C)(C)NC(=O)SCCn1c([N+]([O-])=O)cnc1C	Mol_0196
	Cc1ncc([N+]([O-])=O)n1CCSC(=S)N(CC2)CCC2Cc3ccccc3	Mol_0197
	CC(C)c1c(F)cc(cn1)-c2nnc(o2)SCCn3c([N+]([O-])=O)cnc3C	Mol_0198
	CCN(CC)C(=O)CSc(n1N)nnc1-c2ccccc2	Mol_0199
	Cc1ccc(cc1)-c2nnc(n2N)SCC(=O)NNC(=O)CSc(n3N)nnc3-c4ccccc4	Mol_0200
	c1cccc(c12)N(CCC2)C(=S)SCCn3c([N+]([O-])=O)cnc3C	Mol_0201
	Cc1ncc([N+]([O-])=O)n1CCSC(=S)N2CCN(CC2)c(cc3)ccc3[N+]([O-])=O	Mol_0202
	c1cc(Cl)ccc1C(c2cc(C)ccc2)SCCn3c([N+]([O-])=O)cnc3C	Mol_0203
	c1ccccc1-c(n2N)nnc2CSc(n3N)nnc3-c(cc4)ccc4C	Mol_0204
	CCS(=O)(=O)CCn1c([N+]([O-])=O)cnc1C	Mol_0205
	CS(=O)(=O)CCn1c([N+]([O-])=O)cnc1C	Mol_0206
	COC(=O)c1c(cccc1)[NH+]([O-])CCn2c([N+]([O-])=O)cnc2C	Mol_0207
	Cc1ncc([N+]([O-])=O)n1CCSc(ccc2)c(C)c2CSc(n3)[nH]c(c34)cccc4	Mol_0208
	Cc1ncc([N+]([O-])=O)n1CCSc(o2)nnc2-c3cc(ncc3)NC4CC4	Mol_0209
	CC(=O)Oc(c1C)c(ccc1)-c2nnc(o2)SCCn3c([N+]([O-])=O)cnc3C	Mol_0210
	Cc1ncc([N+]([O-])=O)n1CCSc(o2)nnc2-c(cc3)cc(c34)OCCC4	Mol_0211
	C1CCCN1C(=S)SCCn2c([N+]([O-])=O)cnc2C	Mol_0212
	Cc1ncc([N+]([O-])=O)n1CCSc(o2)nnc2-c3c(O)cc(cc3)OC	Mol_0213
	Cc1ncc([N+]([O-])=O)n1CCSC(=S)N(CC2)CCC2Oc3ccccc3	Mol_0214
	c1ccccc1-c2nnc(n2N)Sc(c3[N+]([O-])=O)ccc(c3)[N+]([O-])=O	Mol_0215
	Cc1ncc([N+]([O-])=O)n1CCSC(=S)N2CCN(CC2)c3c(OC)cccc3	Mol_0216
	CCC(C)NC(=O)CSc(n1N)nnc1-c2ccccc2	Mol_0217
	CC(C)N(C(C)C)C(=S)SCCn1c([N+]([O-])=O)cnc1C	Mol_0218
	c1ccccc1C(=O)C2CCN(CC2)C(=S)SCCn3c([N+]([O-])=O)cnc3C	Mol_0219
	Cc1ncc([N+]([O-])=O)n1CCSc(o2)nnc2-c3c(OC)ccc(Br)c3	Mol_0220
	c1cccc(c12)nc(cc2)NC(=S)SCCn3c([N+]([O-])=O)cnc3C	Mol_0221
	Cc1ncc([N+](=O)[NH-])n1CCSc(o2)nnc2-c3cc(OC)ccc3	Mol_0222
	CC(C)OC(=O)CSc(n1N)nnc1-c2ccccc2	Mol_0223
	c1ccccc1CCSc(n2N)nnc2-c3ccc(cc3)OC	Mol_0224
	CC(C)NC(=O)CSc(n1N)nnc1-c2ccccc2	Mol_0225
	CC(C)(C)OC(=O)CSc(n1N)nnc1-c2ccccc2	Mol_0226
	CC(C)(C)NC(=O)CSc(n1N)nnc1-c2ccccc2	Mol_0227
	CSc(n1N)nnc1-c2ccccc2	Mol_0228
	Cc1ncc([N+]([O-])=O)n1CCSC(=S)N2CCN(CC2)c3ncccn3	Mol_0229
	c1cccc(F)c1C(c2ccccc2)S(=O)(=O)CCn3c([N+]([O-])=O)cnc3C	Mol_0230
	[O-][N+](=O)c1cnc(N)n1CCSc(o2)nnc2-c3c(N)cccc3	Mol_0231
	CC1CCN(CC1)C(=S)SCCn2c([N+]([O-])=O)cnc2C	Mol_0232
	OC1CCN(CC1)C(=S)SCCn2c([N+]([O-])=O)cnc2C	Mol_0233
	c1cccc(OC)c1-n(c2=O)c(SCCn(c3C)c(cn3)[N+]([O-])=O)nc4sc(c5c24)cc(N)cc5	Mol_0234
	Cc1ncc([N+]([O-])=O)n1CCSc(n(c2=O)-c3c(OCC)cccc3)nc4sc(c5c24)CCCC5	Mol_0235
	c1ccccc1CSc(n2N)nnc2-c(cc3)ccc3C	Mol_0236
	Cc1ncc([N+]([O-])=O)n1CCSc(o2)nnc2-c3c(O)cc(cc3)OCC	Mol_0237
	C1CN(C)CCN1C(=S)SCCn2c([N+]([O-])=O)cnc2C	Mol_0238
	C1CCCCN1C(=S)SCCn2c([N+]([O-])=O)cnc2C	Mol_0239
	COC(=O)c1c(cccc1)CSc(n2N)nnc2-c3ccccc3	Mol_0240
	COC(=O)c1c(cccc1)SCn2c([N+]([O-])=O)cnc2C	Mol_0241
	CC(C)N(C)C(=S)SCCn1c([N+]([O-])=O)cnc1C	Mol_0242
	CN(C)C(=S)SCCn1c([N+]([O-])=O)cnc1C.[O-][Cl+3]([O-])=O	Mol_0243
	[O-][N+](=O)c(c1)cnc(c1C)Sc(n2N)nnc2-c(cc3)ccc3C	Mol_0244
	C1CCCCCN1C(=S)SCCn2c([N+]([O-])=O)cnc2C	Mol_0245
	CCOC(=O)C1CCCN(C1)CCSc(n2N)nnc2-c3ccccc3	Mol_0246
	Cc1ncc([N+]([O-])=O)n1CCOC(=O)CSc(o2)nnc2-c(cc3)ccc3C	Mol_0247
	CCCN(CCC)C(=O)CSc(n1N)nnc1-c2ccccc2	Mol_0248
	[O-][N+](=O)c1cnc(N)n1CCSc(o2)nnc2-c3c(O)cccc3	Mol_0249
	Cc(s1)cnc1CCNC(=O)CSc(n2N)nnc2-c3ccccc3	Mol_0250
	c1cccc(OCC)c1-c2nnc(o2)SCn3c([N+]([O-])=O)cnc3C	Mol_0251
	O=C(O)C(O)C(=O)O.Cc1ncc([N+]([O-])=O)n1CCSC(=S)N2CCN(CC2)c3ccccn3	Mol_0252
	c1ccc(C)cc1CSc(n2N)nnc2-c3ccccc3	Mol_0253
	c1ccccc1NC(=O)CSc(n2N)nnc2-c3ccccc3	Mol_0254
	c1ccccc1OC(=O)CSc(n2N)nnc2-c3ccccc3	Mol_0255
	Cc1ncc([N+]([O-])=O)n1CCSCc2c(Cl)ccc(F)c2	Mol_0256
	O=C(O)C(O)C(O)C(=O)O.CN(C)C(=S)SCCn1c([N+]([O-])=O)cnc1C	Mol_0257
	COC(=O)c1c(cccc1)[S+]([O-])CCn2c([N+]([O-])=O)cnc2C	Mol_0258
	Cc1ncc([N+]([O-])=O)n1CCN2CCN(CC2)c3c(OC)cccc3	Mol_0259
	Cc(n1)cnc(c1C)NC(=O)CSc(n2N)nnc2-c3ccccc3	Mol_0260
	NC1CCN(CC1)C(=S)SCCn2c([N+]([O-])=O)cnc2C	Mol_0261
	c1ccccc1C2(C#N)CCN(CC2)C(=S)SCCn3c([N+]([O-])=O)cnc3C	Mol_0262
	Cc1ncc([N+]([O-])=O)n1CCSc(o2)nnc2-c3c(O)c(OC)c(cc3)OC	Mol_0263
	Cc1ncc([N+]([O-])=O)n1CCSC(=S)N2CCN(CC2)c3ccccn3.OC=O	Mol_0264
	c1ccccc1OCCSc(n2N)nnc2-c3cc(OC)c(cc3)OC	Mol_0265
	COc(cc1)c(OC)cc1C(=O)CSc(n2N)nnc2-c3ccccc3	Mol_0266
	c1cccc(c12)NC(=O)C(C)(C)N2C(=S)SCCn3c([N+]([O-])=O)cnc3C	Mol_0267
	c1ccccc1-c(ncc2[N+]([O-])=O)n2CCSc(ccc3)c(C)c3CSc(n4)[nH]c(c45)cccc5	Mol_0268
	O=C(O)C(O)C(O)C(=O)O.Cc1ncc([N+]([O-])=O)n1CCSC(=S)N2CCN(CC2)c3ccccn3	Mol_0269
	Cc(c1)cnc(c1C)NC(=O)NC(=O)CSc(n2N)nnc2-c3ccccc3	Mol_0270
	c1cccc(c1C)NC(=O)CSc(n2N)nnc2-c3ccccc3	Mol_0271
	c1ccc(C)c(c1C)NC(=O)CSc(n2N)nnc2-c3ccccc3	Mol_0272
	CC(C)CNC(=O)CSc(n1N)nnc1-c2ccccc2	Mol_0273
	O=c1[nH]c(=O)n(CCC)c(N)c1C(=O)CSc(n2N)nnc2-c3ccccc3	Mol_0274
	c1cccc(OC)c1-n(c2=O)c(SCCn(c3C)c(cn3)[N+]([O-])=O)nc4sc(c5c24)CCCC5	Mol_0275
	COC(=O)c1cc(O)c(cc1)-c2nnc(o2)SCCn3c([N+]([O-])=O)cnc3C	Mol_0276
	Cc1ncc([N+]([O-])=O)n1CCSC(=S)N2CCN(CC2)c3ncnc(c34)cccc4	Mol_0277
	Cc1ncc([N+]([O-])=O)n1CCSc(o2)nnc2-c3c(OC)cc(cc3)OCC	Mol_0278
	OC1CCN(C1)C(=S)SCCn2c([N+]([O-])=O)cnc2C	Mol_0279
	O=C(O)c1ccc(cc1)CSc(n2N)nnc2-c3ccccc3	Mol_0280
	C1CCCN1C(=O)CSc(n2N)nnc2-c3ccccc3	Mol_0281
	Cc1ncc([N+]([O-])=O)n1CCS(=O)(=O)c2ccc(Br)cc2	Mol_0282
	Cc1ncc([N+]([O-])=O)n1CCSc(o2)nnc2-c(cc3OC)nc(C)c3C	Mol_0283
	Cc1ncc([N+]([O-])=O)n1CCSC(=S)N2CCN(CC2)c3cc(Cl)ccc3	Mol_0284
	C1COCCN1C(=S)SCCn2c([N+]([O-])=O)cnc2C	Mol_0285
	O=C1CCN(CC1)C(=S)SCCn2c([N+]([O-])=O)cnc2C	Mol_0286
	c1ccccc1OCCSc(n2N)nnc2-c3cc(OC)c(OC)c(c3)OC	Mol_0287
	CN(C)S(=O)(=O)CCn1c([N+]([O-])=O)cnc1C	Mol_0288
	c1ccccc1C(C(=O)O)Sc(n2N)nnc2-c3ccccc3	Mol_0289
	CCCS(=O)(=O)CCn1c([N+]([O-])=O)cnc1C	Mol_0290
	c1cc(F)ccc1CSc(n2N)nnc2-c3ccccc3	Mol_0291
	O=C(O)C(O)C(=O)O.Cc1ncc([N+]([O-])=O)n1CCSC(=S)N2CCN(CC2)c3c(OC)cccc3	Mol_0292
	Cc1ncc([N+]([O-])=O)n1CCOc(c(C)c(C)nc2N)c2Cc3ccccc3	Mol_0293
	Cc1cc(C)cc(c1)NC(=O)CSc(n2N)nnc2-c3ccccc3	Mol_0294
	c1ccccc1CCSc(n2N)nnc2-c3cc(OC)c(OC)c(c3)OC	Mol_0295
	CCC(C)(C)NC(=O)CSc(n1N)nnc1-c2ccccc2	Mol_0296
	[O-][n+]1onc(C)c1CSc(n2N)nnc2-c3ccccc3	Mol_0297
	c1cc(C)cc(C)c1C(=O)CSc(n2N)nnc2-c3ccccc3	Mol_0298
	c1cccc(OC)c1-n(c2=O)c(SCCn(c3C)c(cn3)[N+]([O-])=O)nc4sc(c5c24)CCCCC5	Mol_0299
	O=C(O)CSc(n1N)nnc1-c(cc2)ccc2C	Mol_0300
	Cc1ncc([N+]([O-])=O)n1CCSC(=S)N2CCN(CC2)c(n3)[nH]c(c34)cccc4	Mol_0301
	O=C(O)C1CCN(CC1)C(=S)SCCn2c([N+]([O-])=O)cnc2C	Mol_0302
	O=C(O)C(O)C(O)C(O)C(=O)O.CN(C)C(=S)SCCn1c([N+]([O-])=O)cnc1C	Mol_0303
	O=C1CC(O)CN1C(=S)SCCn2c([N+]([O-])=O)cnc2C	Mol_0304
	O=C(O)CC(O)CC(=O)O.CN(C)C(=S)SCCn1c([N+]([O-])=O)cnc1C	Mol_0305
	O=C(O)C(O)C(=O)O.C1CCCN1C(=S)SCCn2c([N+]([O-])=O)cnc2C	Mol_0306
	Cc1onc(C)c1CSc(n2N)nnc2-c3ccccc3	Mol_0307
	O=C(O)CSc(n1N)nnc1-c2ccc(cc2)S(=O)(=O)c3ccccc3	Mol_0308
	c1ccccc1OCCSc(n2N)nnc2-c(c3C)cccc3	Mol_0309
	C1CCCCN1C(=O)CSc(n2N)nnc2-c3ccccc3	Mol_0310
	Cc1ncc([N+]([O-])=O)n1CCS(=O)(=O)c2ccc(Cl)cc2	Mol_0311
	c1ccccc1CSc(n2N)nnc2-c3ccc(cc3)S(=O)(=O)c4ccccc4	Mol_0312
	COC(=O)c1c(cccc1)S(=O)(=O)CCn2c([N+]([O-])=O)cnc2C	Mol_0313
	CC1CCCC(C)N1C(=S)SCCn2c([N+]([O-])=O)cnc2C	Mol_0314
	CC1(C)CCN(CC1)C(=S)SCCn2c([N+]([O-])=O)cnc2C	Mol_0315
	O=C(O)C(O)C(O)C(=O)O.Cc1ncc([N+]([O-])=O)n1CCSC(=S)N2CCN(CC2)c3c(OC)cccc3	Mol_0316
	O=C(O)C(O)(C(=O)O)C(=O)O.Cc1ncc([N+]([O-])=O)n1CCSC(=S)N2CCN(CC2)c3c(OC)cccc3	Mol_0317
	COCCN1C(=O)N(CC)C(=O)C(C1=O)CCSc(n2N)nnc2-c3ccccc3	Mol_0318
	ONC(=O)CSc(n1N)nnc1-c2ccc(cc2)S(=O)(=O)c3ccccc3	Mol_0319
	C1CCCCC1NC(=O)CSc(n2N)nnc2-c3ccccc3	Mol_0320
	Cc1c(C)cc(C)c(C)c1NC(=O)CSc(n2N)nnc2-c3ccccc3	Mol_0321
	CC(C)NC(=O)NC(=O)CSc(n1N)nnc1-c2ccccc2	Mol_0322
	CC(C)CCNC(=O)CSc(n1N)nnc1-c2ccccc2	Mol_0323
	COc(cc1)ccc1OCCSc(n2N)nnc2-c3cc(OC)ccc3	Mol_0324
	O=C(O)C(O)C(O)C(=O)O.C1CCCN1C(=S)SCCn2c([N+]([O-])=O)cnc2C	Mol_0325
	CC1CCCN(CC1)C(=S)SCCn2c([N+]([O-])=O)cnc2C	Mol_0326
	c1ccccc1C(C)n2c([N+]([O-])=O)cnc2C	Mol_0327
	CCOc(cc1)ccc1-c2nnc(n2N)SCc3ccccc3	Mol_0328
	c1ccccc1NCCSc(n2N)nnc2-c3ccc(Cl)cc3	Mol_0329
	c1ccccc1C(=O)NNC(=O)CSc(n2N)nnc2-c3ccccc3	Mol_0330
	c1ccccc1C(=O)OCC(=O)OC2CCN(CC2)C(=S)SCCn3c([N+]([O-])=O)cnc3C	Mol_0331
	CCOc(cc1)ccc1NC(=O)CSc(n2N)nnc2-c3ccccc3	Mol_0332
	C1CCCC(C)C1C(=S)SCCn2c([N+]([O-])=O)cnc2C	Mol_0333
	c1cccc(c12)N(C)C(/C2(C)C)=C\C(=O)CCCSc(n3N)nnc3-c4ccccc4	Mol_0334
	c1ccccc1C(c2ccccc2)Sc(n3N)nnc3-c4ccccc4	Mol_0335
	c1ccccc1C2CN(CCCN2C(=O)C)C(=S)SCCn3c([N+]([O-])=O)cnc3C	Mol_0336
	COc(cc1)ccc1OCCSc(n2N)nnc2-c3ccc(cc3)OC	Mol_0337
	CC(C)(C)c1ccc(cc1)-c2nnc(n2N)SCc3ccccc3	Mol_0338
	Cc1cc(ccc1)NC(=O)CSc(n2N)nnc2-c3ccccc3	Mol_0339
	Cc1c(C)cccc1NC(=O)CSc(n2N)nnc2-c3ccccc3	Mol_0340
	Cc1c(C)ccc(c1)NC(=O)CSc(n2N)nnc2-c3ccccc3	Mol_0341
	CC(C)(C)c1ccc(cc1)NC(=O)CSc(n2N)nnc2-c3ccccc3	Mol_0342
	CN(C)C(=S)SCCn1c([N+]([O-])=O)cnc1C.c2ccc(OC)cc2-c(nn3)n(c34)N=CC(O4)c5ccccc5	Mol_0343
	CC(C)(C)c1ccc(cc1)-c2nnc(o2)SCCn3c([N+]([O-])=O)cnc3CC	Mol_0344
	c1ccccc1-c2nnc(n2N)Sc3ccccc3	Mol_0345
	Cc1ncc([N+]([O-])=O)n1CCSc(o2)nnc2-c3cc(OC)c(cc3)OC4CCOC4	Mol_0346
	[O-]C(=O)C(O)C(O)C(=O)O.Cc1ncc([N+]([O-])=O)n1CCSC(=S)N2CCN(CC2)c3ccccn3	Mol_0347
	O=C(O)CC(O)(C(=O)O)CC(=O)O.Cc1ncc([N+]([O-])=O)n1CCSC(=S)N2CCN(CC2)c3ccccn3	Mol_0348
	O=C(O)CSc(n1N)nnc1-c2cc(OC)ccc2	Mol_0349
	c1ccccc1CSc(n2N)nnc2-c3cc(OC)ccc3	Mol_0350
	C1COCCN1C(=O)CSc(n2N)nnc2-c3ccccc3	Mol_0351
	c1cccc(N)c1NC(=O)CSc(n2N)nnc2-c3ccccc3	Mol_0352
	CCOc1c(OCC)ccc(c1)NC(=O)CSc(n2N)nnc2-c3ccccc3	Mol_0353
	CC1CCCN1C(=S)SCCn2c([N+]([O-])=O)cnc2C	Mol_0354
	COC(=O)c1c(cccc1)S(=O)(=O)CCCn2c([N+]([O-])=O)cnc2C	Mol_0355
	c1cccc(c12)N(C)C(/C2(C)C)=C\C(=O)CSc(n3N)nnc3-c4ccccc4	Mol_0356
	c1cccc(c12)N(C)C(=O)N(C)C\2=C\C(=O)CCCSc(n3N)nnc3-c4ccccc4	Mol_0357
	Cc1ncc([N+]([O-])=O)n1CCSC(=S)N2CCN(CC2)c(c3[N+]([O-])=O)ccc(c3)[N+]([O-])=O	Mol_0358
	c1ccccc1CSc(n2N)nnc2-c3ccc(cc3)OC	Mol_0359
	FC(F)(F)c1ccc(cc1)CSc(n2N)nnc2-c3ccccc3	Mol_0360
	c1cc(C)cc(c1C)NC(=O)CSc(n2N)nnc2-c3ccccc3	Mol_0361
	COc(cc1)ccc1NC(=O)CSc(n2N)nnc2-c3ccccc3	Mol_0362
	Cc(c1)ccc(c1C)NC(=O)CSc(n2N)nnc2-c3ccccc3	Mol_0363
	CCC1CCN(CC1)C(=O)CSc(n2N)nnc2-c3ccccc3	Mol_0364
	c1cccc(OC)c1NC(=O)CSc(n2N)nnc2-c3ccccc3	Mol_0365
	c1ccccc1N(c2ccccc2)C(=O)CSc(n3N)nnc3-c4ccc(cc4)OC	Mol_0366
	Cc1c(N)c(ccc1)NC(=O)CSc(n2N)nnc2-c3ccccc3	Mol_0367
	Cc1ccc(cc1)NC(=O)NC(=O)CSc(n2N)nnc2-c3ccccc3	Mol_0368
	c1cc(S(=O)(=O)N)ccc1NC(=O)CSc(n2N)nnc2-c3ccccc3	Mol_0369
	CC1CCCCN1C(=S)SCCn2c([N+]([O-])=O)cnc2C	Mol_0370
	O1CCOC12CCN(CC2)C(=S)SCCn3c([N+]([O-])=O)cnc3C	Mol_0371
	c1ccccc1CSc(n2N)nnc2-c3ccc(Cl)cc3	Mol_0372
	CC1CCCN(C1)C(=S)SCCn2c([N+]([O-])=O)cnc2C	Mol_0373
	Clc1cccc(Cl)c1NC(=O)CSc(n2N)nnc2-c3ccccc3	Mol_0374
	CC1(C)CCCN(CC1)C(=S)SCCn2c([N+]([O-])=O)cnc2C	Mol_0375
	c1cc(F)cc(c1C)N(CC2)CCN2C(=S)SCCn3c([N+]([O-])=O)cnc3C	Mol_0376
	Nc1n(C)c(C)c(c1C=O)CCn2c([N+]([O-])=O)cnc2C	Mol_0377
	O=C(O)CSc(n1N)nnc1-c(c2C)cccc2	Mol_0378
	CN1CCN(CC1C)C(=S)SCCn2c([N+]([O-])=O)cnc2C	Mol_0379
	c1ccccc1C(C2(C(=O)O)CC(=O)O)SC(\N2C)=C\C(=O)CCCSc(n3N)nnc3-c4ccccc4	Mol_0380
	CCOC(=O)C1CCN(CC1)C(=S)SCCn2c([N+]([O-])=O)cnc2C	Mol_0381
	NS(=O)(=O)OC1CCN(CC1)C(=S)SCCn2c([N+]([O-])=O)cnc2C	Mol_0382
	Cc1cc(C)cc(c1)NC(=O)NC(=O)CSc(n2N)nnc2-c3ccccc3	Mol_0383
	COCCNC(=O)NC(=O)CSc(n1N)nnc1-c2ccccc2	Mol_0384
	Cc1csc(n1)NC(=O)CSc(n2N)nnc2-c3ccccc3	Mol_0385
	c1ccnc(Cl)c1NC(=O)CSc(n2N)nnc2-c3ccccc3	Mol_0386
	c1cccc(c12)C(=O)N(C2=O)CCNC(=O)CSc(n3N)nnc3-c4ccccc4	Mol_0387
	c1cccc(OC)c1CCSc(n2N)nnc2-c3cc(OC)ccc3	Mol_0388
	C1CCCC(C1C)NC(=O)CSc(n2N)nnc2-c3ccccc3	Mol_0389
	CCc1c(C)c(C)c(cc1)NC(=O)CSc(n2N)nnc2-c3ccccc3	Mol_0390
	c1ccccc1-c2nnc(n2N)Sc3ccc(Br)cc3	Mol_0391
	c1ccccc1C(c2ccccc2)Sc(n3N)nnc3-c(cc4)ccc4C	Mol_0392
	CC(C)OC(=O)c1c(cccc1)S(=O)(=O)CCn2c([N+]([O-])=O)cnc2C	Mol_0393
	c1ccccc1CSc(n2N)nnc2-c3ccc(cc3)S(=O)(=O)c4ccc(Cl)cc4	Mol_0394
	O=C(O)CSc(n1N)nnc1-c2cc(ccc2)OC(C)C	Mol_0395
	CCOC(=O)CSc(n1N)nnc1-c2cc(ccc2)OCC	Mol_0396
	c1ccccc1-c2nnc(n2N)Sc3ccc(S(=O)(=O)Cl)cc3	Mol_0397
	O=C(O)CSc(n1N)nnc1-c(cc2)ccc2C(C)(C)C	Mol_0398
	c1ccccc1COC(=O)C(C2(C)C)\C(N2C)=C\C(=O)CCCSc(n3N)nnc3-c4ccccc4	Mol_0399
	Cc1ncc([N+]([O-])=O)n1CCSC(=S)N(CC2C)CCN2c3c(OC)cccc3	Mol_0400
	Cc1ccc([N+]([O-])=O)n1NC(=O)CSc(n2N)nnc2-c3c(OC)cccc3	Mol_0401
	CC1(C)C(C12)CCN(C2O)C(=S)SCCn3c([N+]([O-])=O)cnc3C	Mol_0402
	Cc1ncc([N+]([O-])=O)n1CCSC(=S)N(CCC(=O)O)CCS(=O)(=O)CCn2c([N+]([O-])=O)cnc2C	Mol_0403
	COc1c(OC)ccc(c1)NC(=O)CSc(n2N)nnc2-c3ccccc3	Mol_0404
	C1CCCCC1NC(=O)NC(=O)CSc(n2N)nnc2-c3ccccc3	Mol_0405
	c1ccccc1S(=O)(=O)c(cc2)ccc2CSc(n3N)nnc3-c4ccc(cc4)OC	Mol_0406
	c1cccc(c12)[nH]c(n2)CSc(n3N)nnc3-c4ccccc4	Mol_0407
	c1ccccc1CSc(n2N)nnc2-c3cc(OC)c(cc3)OC	Mol_0408
	NC(=O)CSc(n1N)nnc1-c2cc(OC)ccc2	Mol_0409
	c1ccccc1Cn(nn2)cc2CSc(n3N)nnc3-c4ccccc4	Mol_0410
	O=C(O)CSc(n1N)nnc1-c(ccc2)cc2C(C)(C)C	Mol_0411
	Cc1ncc([N+]([O-])=O)n1CCSC(=S)N(CC2)CCC2Cc3cccnc3	Mol_0412
	CCC1CCCCN1C(=S)SCCn2c([N+]([O-])=O)cnc2C	Mol_0413
	c1ccc(OC)cc1NC(=O)NCCn2c([N+]([O-])=O)cnc2C	Mol_0414
	c1ccccc1N(C)C(=O)CSc(n2N)nnc2-c3ccc(cc3)S(=O)(=O)c4ccc(Br)cc4	Mol_0415
	c1cccc(OCC)c1-c2nnc(n2N)NC(=O)CSc(n3N)nnc3-c4ccccc4	Mol_0416
	c1cc(Cl)ccc1C(O)(C(=O)O)c2ccc(Cl)cc2.Cc3ncc([N+]([O-])=O)n3CCSC(=S)N4CCN(CC4)c5ccccn5	Mol_0417
	c1ccccc1N(C)C(=O)CSc(n2N)nnc2-c3ccc(Cl)cc3	Mol_0418
	c1cccc(c1C)-n(c(C)c2C)c(n2)CSc(n3N)nnc3-c4ccccc4	Mol_0419
	c1ccccc1N(CC2)CCN2C(=O)CSc(n3N)nnc3-c(cc4)ccc4C	Mol_0420
	Cc(c1)ccc(c12)[nH]c(c2)CSc(n3N)nnc3-c4ccccc4	Mol_0421
	O=C(O)CSc(n1N)nnc1-c2cc(N)ccc2	Mol_0422
	CCN(CC)C(=S)Sc(n1N)nnc1-c2ccccc2	Mol_0423
	COC(=O)c1c(cccc1)[S+]([O-])Cc2ccc(cc2)OCCn3c([N+]([O-])=O)cnc3C	Mol_0424
	C1CCCC(C12C)N(CC2)C(=S)SCCn3c([N+]([O-])=O)cnc3C	Mol_0425
	c1ccccc1C(c2ccccc2)(c3ccccc3)Sc(n4N)nnc4-c5ccccc5	Mol_0426
	CC(=O)Nc(cc1)cc(c1C)NC(=O)CSc(n2N)nnc2-c3ccccc3	Mol_0427
	c1ccc(OC)cc1NC(=O)CSc(n2N)nnc2-c3ccccc3	Mol_0428
	CC(=O)NC1CCN(CC1)C(=O)CSc(n2N)nnc2-c3ccccc3	Mol_0429
	COc1c(OC)cc(cc1OC)NC(=O)CSc(n2N)nnc2-c3ccccc3	Mol_0430
	COc1cccc(c1C)NC(=O)CSc(n2N)nnc2-c3ccccc3	Mol_0431
	O=C(O)C(=O)c1ccc(cc1)OCCSc(n2N)nnc2-c3ccc(cc3)OC	Mol_0432
	CCC(C)CNC(=O)NC(=O)CSc(n1N)nnc1-c2ccccc2	Mol_0433
	CCC1CCCCN1C(=O)CSc(n2N)nnc2-c3ccccc3	Mol_0434
	C=C(C)C(C)NC(=O)NC(=O)CSc(n1N)nnc1-c2ccccc2	Mol_0435
	c1ccccc1CSCCCC(=O)OC2CCN(CC2)C(=S)SCCn3c([N+]([O-])=O)cnc3C	Mol_0436
	O=C(O)CSc(n1N)nnc1-c2ccc(cc2)S(=O)(=O)c3ccc(Br)cc3	Mol_0437
	C=C(C)CS(=O)(=O)CCCn1c([N+]([O-])=O)cnc1C	Mol_0438
	c1ccccc1CSc(n2N)nnc2-c3cc(OC)c(OC)c(c3)OC	Mol_0439
	c1cc(Cl)ccc1C2(C#N)CCN(CC2)C(=S)SCCn3c([N+]([O-])=O)cnc3C	Mol_0440
	c1ccccc1OCSc(n2N)nnc2-c3cc(Cl)ccc3	Mol_0441
	[O-][N+](=O)c1cn(cn1)CCSc(n2-c3c(OC)cccc3)nnc2-c4cc(OC)c(OC)c(c4)OC	Mol_0442
	CS(=O)(=O)OC1CCN(CC1)C(=S)SCCn2c([N+]([O-])=O)cnc2C	Mol_0443
	CC(=O)OC1CCN(CC1)C(=S)SCCn2c([N+]([O-])=O)cnc2C	Mol_0444
	c1ccccc1-c2nnc(n2N)SCC(=O)Nc3cccc(c34)[nH]c5c(c4=O)cccc5	Mol_0445
	c1cccc(c1c23)n(CC)c2ccc(c3)NC(=O)CSc(n4N)nnc4-c5ccccc5	Mol_0446
	CS(C)OC1CCN(CC1)C(=S)SCCn2c([N+]([O-])=O)cnc2C	Mol_0447
	CC(C)OC1CCN(CC1)C(=S)SCCn2c([N+]([O-])=O)cnc2C	Mol_0448
	O=C(O)CSc(n1N)nnc1-c2ccc(Cl)cc2	Mol_0449
	c1cccc(Cl)c1C(=O)SCC(=O)OC2CCN(CC2)C(=S)SCCn3c([N+]([O-])=O)cnc3C	Mol_0450
	O=C(O)C(O)C(O)C(=O)O.c1cc(Cl)cc(c1C)N(CC2)CCN2C(=S)SCCn3c([N+]([O-])=O)cnc3C	Mol_0451
	c1ccccc1NC(=O)CSc(n2N)nnc2-c3ccc(cc3)S(=O)(=O)c4ccccc4	Mol_0452
	c1ccccc1C(=O)CSc(n2N)nnc2-c3cc(OC)c(OC)c(c3)OC	Mol_0453
	o1cccc1CNC(=O)CSc(n2N)nnc2-c3ccccc3	Mol_0454
	Cc(c1)ccc(c12)[nH]c(n2)CSc(n3N)nnc3-c4ccccc4	Mol_0455
	ClC(Cl)(Cl)c1ccc(cc1)S(=O)(=O)c(cc2)ccc2-c3nnc(n3N)SCc4ccccc4	Mol_0456
	Clc1cccc(c1Cl)NC(=O)CSc(n2N)nnc2-c3ccccc3	Mol_0457
	Cc1cc(ccc1)OCCSc(n2N)nnc2-c3cc(OC)cc(c3)OC	Mol_0458
	COC(=O)CSc(n1N)nnc1-c2cc(ccc2)OCC	Mol_0459
	COc(cc1)ccc1OCCSc(n2N)nnc2-c3cc(F)ccc3	Mol_0460
	c1ccccc1NC(=O)CSc(n2N)nnc2-c3ccc(cc3)OC	Mol_0461
	Cc1cc(ccc1)OCCSc(n2N)nnc2-c3ccc(cc3)OC	Mol_0462
	ClC(Cl)C(=O)OC1CCN(CC1)C(=S)SCCn2c([N+]([O-])=O)cnc2C	Mol_0463
	NC(=O)CSc(n1N)nnc1-c2ccc(cc2)OCC	Mol_0464
	c1ccccc1CSc(n2N)nnc2-c3cc(Cl)ccc3	Mol_0465
	C=C(C)CSc(n1N)nnc1-c(cc2)ccc2C(=O)O	Mol_0466
	c1ccccc1NC(=O)CSc(n2N)nnc2-c3ccc(cc3)S(=O)(=O)c4ccc(Br)cc4	Mol_0467
	O1CCCC1CNC(=O)CSc(n2N)nnc2-c3ccccc3	Mol_0468
	c1cccc(c1C#N)SCCn2c(ncc2[N+]([O-])=O)C3CCCC3	Mol_0469
	Cc1cc(c(cc1)OC)NC(=O)CSc(n2N)nnc2-c3ccccc3	Mol_0470
	CCN(CC)S(=O)(=O)c(ccc1)cc1-c2nnc(n2N)SCc3nnc(n3N)-c4ccccc4	Mol_0471
	C1CCCC1NC(=O)CSc(n2N)nnc2-c3ccc(cc3)Sc(n4N)nnc4-c5ccccc5	Mol_0472
	Cc1cc(C)c(c(C)c1C)NC(=O)NC(=O)CSc(n2N)nnc2-c3ccccc3	Mol_0473
	c1ccccc1C(O)(C(=O)O)CSc(n2N)nnc2-c3cc(OC)ccc3	Mol_0474
	CC(C)Cc(cc1)ccc1C(c2ccc(N)nc2)Sc(n3N)nnc3-c4ccccc4	Mol_0475
	CCCc1cc(ccc1)NC(=O)CSc(n2N)nnc2-c3ccccc3	Mol_0476
	N#CCSc(n1N)nnc1-c(cc2)ccc2C	Mol_0477
	c1c(F)c(F)c(Cl)c(Cl)c1CSc(n2N)nnc2-c3ccccc3	Mol_0478
	c1ccccc1NC(=O)CSc(n2N)nnc2-c3ccc(Cl)cc3	Mol_0479
	c1cc(Cl)ccc1C(n2cccc2)CSc(n3N)nnc3-c4ccccc4	Mol_0480
	c1ccccc1C(=O)CSc(n2N)nnc2-c3cc(F)ccc3	Mol_0481
	CC(C)(C)C(=O)OC(C)C(=O)NC(=S)SCCn1c([N+]([O-])=O)cnc1C	Mol_0482
	c1cccc(OC)c1N(CC2)CCN2C(=S)SCCSc(n3N)nnc3-c4ccccc4	Mol_0483
	CC(=O)Nc(c1)ccc(OCC)c1NC(=O)CSc(n2N)nnc2-c3ccccc3	Mol_0484
	Cc1ncc([N+]([O-])=O)n1CCSC(=S)N(CC2)CCC2C3OCCCO3	Mol_0485
	Cc1ncc([N+]([O-])=O)n1CCSC(=S)N2CCN(c(c23)cccc3)c4noc(C(C)C)c4C	Mol_0486
	O=C(O)c1ccc(cc1)Sc(n2N)nnc2-c3ccccc3	Mol_0487
	c1cccc(c12)N(CCC2)C(=O)CSc(n3N)nnc3-c4ccccc4	Mol_0488
	c1ccccc1C(O)(Cn2cncn2)CSc(n3N)nnc3-c4ccccc4	Mol_0489
	c1ccccc1\C=C\CSc(n2N)nnc2-c3cc(OC)c(OC)c(c3)OC	Mol_0490
	c1cccc(Cl)c1CCSc(n2N)nnc2-c3cc(OC)c(OC)c(c3)OC	Mol_0491
	c1cc(Cl)cc(Cl)c1NC(=O)CSc(n2N)nnc2-c3ccccc3	Mol_0492
	COc(cc1)ccc1OCCSc(n2N)nnc2-c3cc(Cl)ccc3	Mol_0493
	c1ccccc1NC(=O)CSc(n2N)nnc2-c3cc(OC)cc(c3)OC	Mol_0494
	O=C(O)C(O)C(O)C(O)C(=O)O.CN(C)C(=S)SCCn1c([N+]([O-])=O)cnc1C.FC(F)(F)S(=O)(=O)O	Mol_0495
	O=C(O)CSCC(=O)OC1CCN(CC1)C(=S)SCCn2c([N+]([O-])=O)cnc2C	Mol_0496
	COC(=O)/C(=C/OC)c1c(cccc1)CSc(n2N)nnc2-c3ccccc3	Mol_0497
	c1cccc(c12)CCCC2NC(=O)CSc(n3N)nnc3-c4ccccc4	Mol_0498
	O=C1CSC(=O)N1CCNC(=O)CSc(n2N)nnc2-c3ccccc3	Mol_0499
	c1ccccc1CNC(=O)CSc(n2N)nnc2-c3cc(OC)ccc3	Mol_0500
	COc(cc1)cc(OC)c1NC(=O)CSc(n2N)nnc2-c3ccccc3	Mol_0501
	c1ccccc1OCCSc(n2N)nnc2-c3c(N)cccc3	Mol_0502
	C=C(C)CSc(n1N)nnc1-c2ccc(cc2)S(=O)(=O)C	Mol_0503
	CSCC(=O)OC1CCN(CC1)C(=S)SCCn2c([N+]([O-])=O)cnc2C	Mol_0504
	CC12CC(CC1)N(CC2)C(=S)SCCn3c([N+]([O-])=O)cnc3C	Mol_0505
	ClC(Cl)(Cl)C(=O)OC(F)(F)F.CN(C)C(=S)SCCn1c([N+]([O-])=O)cnc1C	Mol_0506
	COC(=O)OC1CCN(CC1)C(=S)SCCn2c([N+]([O-])=O)cnc2C	Mol_0507
	Cc1ccc(cc1)OCCSc(n2N)nnc2-c3cc(OC)c(cc3)OC	Mol_0508
	c1ccc(Cl)cc1OCCSc(n2N)nnc2-c3ccc(Cl)cc3	Mol_0509
	COc(cc1)ccc1OCCSc(n2N)nnc2-c3cc(OC)c(cc3)OC	Mol_0510
	c1ccccc1-c2nnc(n2N)Sc3ccc(Cl)cc3	Mol_0511
	C=C(C)CSc(n1N)nnc1-c(cc2)ccc2C	Mol_0512
	c1ccccc1-c2nnc(n2N)Sc3c(Cl)cccc3Cl	Mol_0513
	c1ccccc1C(c2ccccc2)S(=O)(=O)c(n3N)nnc3-c4ccccc4	Mol_0514
	c1ccccc1OC(=O)CSc(n2N)nnc2-c3cc(OC)c(OC)c(c3)OC	Mol_0515
	COC(=O)c1c(cccc1)CSc(n2N)nnc2-c3ccc(Cl)cc3	Mol_0516
	c1cccc(c12)[nH]c(n2)NC(=O)CSc(n3N)nnc3-c4ccccc4	Mol_0517
	c1cc(Cl)ccc1C(c2ccccc2)Sc(n3N)nnc3-c4ccccc4	Mol_0518
	NC(=O)CSc(n1N)nnc1-c2ccc(cc2)OC	Mol_0519
	C=C(C)CSc(n1N)nnc1-c(cc2C)ccc2	Mol_0520
	c1ccc(C)cc1CSc(n2N)nnc2-c(cc3)ccc3C	Mol_0521
	Cc1ncc([N+]([O-])=O)n1CCSC(=S)N(CC2)CCC2Oc3ccc(F)c(Cl)c3Cl	Mol_0522
	O1CCCC1NC(=O)NC(=O)CSc(n2N)nnc2-c3ccccc3	Mol_0523
	Cc1onc(C)c1CCCNC(=O)CSc(n2N)nnc2-c3ccccc3	Mol_0524
	c1ccccc1/C=N/n2c(nnc2-c3ccccc3)SCSc(n4N)nnc4-c5ccc(cc5)OCC	Mol_0525
	c1ccccc1C(C)NC(=O)CSc(n2N)nnc2-c3cc(OC)ccc3	Mol_0526
	c1ccccc1NC(=O)N(c2ccccc2)C(=O)CSc(n3N)nnc3-c4ccc(cc4)OC	Mol_0527
	C1CCCC(C1C)NC(=O)NC(=O)CSc(n2N)nnc2-c3ccccc3	Mol_0528
	Cc1nc(N)nc(C)c1CCSc(n2N)nnc2-c3ccc(Cl)cc3	Mol_0529
	O=C(O)CSc(n1N)nnc1-c2ccc(cc2)S(=O)(=O)c(cc3)ccc3O	Mol_0530
	c1cccc(c12)n(CCCC)c(N)c(c2=O)N(CCOC)C(=O)CSc(n3N)nnc3-c(cc4)ccc4C	Mol_0531
	C1CCCN1C(=S)SCC(=O)OC2CCN(CC2)C(=S)SCCn3c([N+]([O-])=O)cnc3C	Mol_0532
	ClCC(=O)OC1CCN(CC1)C(=S)SCCn2c([N+]([O-])=O)cnc2C	Mol_0533
	O1CCCC1CNC(=O)NC(=O)SCCn2c([N+]([O-])=O)cnc2C	Mol_0534
	O=C(O)CSc(n1N)nnc1-c2cc(OC)c(cc2)OCC	Mol_0535
	COc(cc1)ccc1OCCSc(n2N)nnc2-c3cc(OC)c(OC)c(c3)OC	Mol_0536
	c1ccccc1CSc(n2N)nnc2-c3cc(OC)c(O)cc3	Mol_0537
	c1ccccc1CSC(C)CSc(n2N)nnc2-c3ccc(Cl)cc3	Mol_0538
	COc(cc1)ccc1C(=O)C2CCN(CC2)C(=S)SCCn3c([N+]([O-])=O)cnc3C	Mol_0539
	Cc(c1)cc(C)cc1CSc(n2N)nnc2-c(cc3)ccc3C	Mol_0540
	c1ccccc1-c2nnc(n2N)Sc(c3)ccc(c34)cccc4	Mol_0541
	C1COCCN1c(cc2)ccc2NC(=O)CSc(n3N)nnc3-c4ccccc4	Mol_0542
	c1ccccc1NC(=O)CSc(n2N)nnc2-c3cc(OC)c(OC)c(c3)OC	Mol_0543
	c1ccccc1COC(=O)CSc(n2N)nnc2-c3cc(OC)c(OC)c(c3)OC	Mol_0544
	c1ccc(OC)cc1CCSc(n2N)nnc2-c3cc(c(cc3)OC)OCC	Mol_0545
	c1ccccc1N(C(C)C)C(=O)CSc(n2N)nnc2-c(cc3)ccc3C(C)(C)C	Mol_0546
	c1ccccc1N(c2ccccc2)C(=O)CSc(n3N)nnc3-c4ccc(cc4)OC(F)F	Mol_0547
	CCN(CC)C(=O)CSc(n1N)nnc1-c(cc2)ccc2C	Mol_0548
	Cc1ccc(cc1)OC(=O)CSc(n2N)nnc2-c(cc3)ccc3C	Mol_0549
	Cc1ccc(cc1)NC(=O)CSc(n2N)nnc2-c(cc3)ccc3C	Mol_0550
	Cc1ccc(C)n1/N=C(\C)c2ccc(cc2)NC(=O)CSc(n3N)nnc3-c4ccccc4	Mol_0551
	Cc(c1)cnc(c1C)NC(=O)CSc(n2N)nnc2-c3cc(F)ccc3	Mol_0552
	O=S1(=O)CC(CC1)N(CC)C(=O)CSc(n2N)nnc2-c3ccccc3	Mol_0553
	c1cccc(c1C)NC(=O)CSc(n2N)nnc2-c3ccc(cc3)S(=O)(=O)c4ccc(Br)cc4	Mol_0554
	CC(=O)Nc(c1)ccc(OC)c1NC(=O)CSc(n2N)nnc2-c3ccccc3	Mol_0555
	C1CCCCN1C(=S)SCC(=O)OC2CCN(CC2)C(=S)SCCn3c([N+]([O-])=O)cnc3C	Mol_0556
	O=C(O)CSc(n1N)nnc1-c2ccc(cc2)S(=O)(=O)c3ccc(Cl)cc3	Mol_0557
	c1ccc(C)c(c1C)NC(=O)CSc(n2N)nnc2-c(cc3)ccc3C	Mol_0558
	c1ccccc1C(c2ccccc2)Sc(n3N)nnc3-c4cc(OC)ccc4	Mol_0559
	FC(F)Oc(cc1)ccc1-c2nnc(n2N)SCc3ccccc3	Mol_0560
	c1cc([N+]([O-])=O)cc(c12)[nH]c(n2)CSc(n3N)nnc3-c4cc(Cl)ccc4	Mol_0561
	ONC(=O)CSc(n1N)nnc1-c2cc(Cl)ccc2	Mol_0562
	c1ccc(C)c(c1C)NC(=O)CSc(n2N)nnc2-c(cc3)ccc3C	Mol_0563
	C=C(C)c1ccc(cc1)-c2nnc(n2N)SCC(=O)NO	Mol_0564
	O=C(O1)C(C)(C)CC12CCN(CC2)C(=S)SCCn3c([N+]([O-])=O)cnc3C	Mol_0565
	c1ccccc1NC(=O)CSc(n2N)nnc2-c(c3C)cccc3	Mol_0566
	c1ccccc1C(c2ccccc2)NC(=O)C3C(Cc(c4C35C)cccc4)N(CC5)C(=S)SCCn6c([N+]([O-])=O)cnc6C	Mol_0567
	c1ccccc1C(=O)NNC(=O)CSc(n2N)nnc2-c3ccc(Cl)cc3	Mol_0568
	c1ccccc1C(c2ccccc2)(c3ccccc3)NC(=O)CSc(n4N)nnc4-c5ccc(Cl)cc5	Mol_0569
	c1cccc(c1C)NC(=O)CSc(n2N)nnc2-c3ccc(F)cc3	Mol_0570
	c1cccc(c1C)NC(=O)CSc(n2N)nnc2-c3ccc(Cl)cc3	Mol_0571
	CCC(C)NC(=O)CSc(n1N)nnc1-c(cc2C)ccc2	Mol_0572
	COc(cc1)ccc1C(=O)CSc(n2N)nnc2-c3cc(OC)ccc3	Mol_0573
	c1ccccc1NC(=O)CSc(n2N)nnc2-c3cc(Cl)ccc3	Mol_0574
	Cc1ccc(cc1)OCCSc(n2N)nnc2-c3cc(OC)c(OC)c(c3)OC	Mol_0575
	O=C(O)C(O)(C(=O)O)CS(=O)(=O)C1=CCSc(c12)cccc2.Cc3ncc([N+]([O-])=O)n3CCSC(=S)N4CCN(CC4)c5ccccn5	Mol_0576
	O=C(O)C(O)C(O1)C(O)C(C1=O)O.C2CCCN2C(=S)SCCn3c([N+]([O-])=O)cnc3C	Mol_0577
	O1COc(c12)ccc(c2)NC(=O)CSc(n3N)nnc3-c4ccccc4	Mol_0578
	c1ccccc1NC(=O)CSc(n2N)nnc2-c3ccc(cc3)S(=O)(=O)c4ccc(Cl)cc4	Mol_0579
	ClC(Cl)c1cc(cc(Cl)c1)NC(=O)CSc(n2N)nnc2-c3ccccc3	Mol_0580
	c1ccccc1N(C)C(=O)CSc(n2N)nnc2-c3cc(OC)c(OC)c(c3)OC	Mol_0581
	O1CCOc(c12)ccc(c2)NC(=O)CSc(n3N)nnc3-c4ccccc4	Mol_0582
	c1ccccc1CC2CCN(CC2)C(=O)CSc(n3N)nnc3-c(cc4)ccc4C	Mol_0583
	c1ccccc1CNC(=O)CSc(n2N)nnc2-c3cc(OC)c(OC)c(c3)OC	Mol_0584
	Clc1cccc(Cl)c1NC(=O)CSc(n2N)nnc2-c3ccc(cc3)S(=O)(=O)c4ccccc4	Mol_0585
	c1cccc(c12)[nH]c(n2)CSc(n3N)nnc3-c4ccc(cc4)S(=O)(=O)c5ccccc5	Mol_0586
	c1ccccc1C(=O)C(c2ccccc2)Sc(n3N)nnc3-c4cc(OC)ccc4	Mol_0587
	c1ccccc1-c2nnc(n2N)Sc3c(Cl)cc(Cl)cc3Cl	Mol_0588
	c1ccccc1C(F)S(=O)(=O)c(n2N)nnc2-c3ccccc3	Mol_0589
	C=C(C)CSc(n1N)nnc1-c2ccc(N)cc2	Mol_0590
	c1ccccc1-c2nnc(n2N)SCc3cc(F)cc(c34)COC(O4)c5ccccc5	Mol_0591
	c1ccccc1Cc2nc(on2)CSc(n3N)nnc3-c4ccc(cc4)OCC	Mol_0592
	c1ccccc1CCNC(=O)CSc(n2N)nnc2-c3ccc(cc3)S(=O)(=O)c4ccc(Br)cc4	Mol_0593
	CC(C)OC(=O)CSc(n1N)nnc1-c(cc2)ccc2C	Mol_0594
	CC(C)(C)OC(=O)CSc(n1N)nnc1-c(cc2)ccc2C	Mol_0595
	CNc(n1)n(CC)c(c12)ccc(c2)NC(=O)CSc(n3N)nnc3-c4ccccc4	Mol_0596
	c1ccccc1Cn(c(=O)[nH]c2=O)c(N)c2N(C)C(=O)CSc(n3N)nnc3-c4ccc(Cl)cc4	Mol_0597
	C1CCCN1C(=S)SCCC(=O)OC2CCN(CC2)C(=S)SCCn3c([N+]([O-])=O)cnc3C	Mol_0598
	Cc1ncc([N+]([O-])=O)n1CCSC(=S)N(CC2)CCC2OS(=O)(=O)C3CCCCC3	Mol_0599
	O=C(O1)C(C)CC12CCN(CC2)C(=S)SCCn3c([N+]([O-])=O)cnc3C	Mol_0600
	CCN(CC)C(=O)CSc(n1N)nnc1-c2ccc(cc2)OCC	Mol_0601
	C1CCCC1NC(=O)CSc(n2N)nnc2-c(cc3)ccc3C	Mol_0602
	c1ccccc1CC(c2ccccc2)Sc(n3N)nnc3-c(cc4C)ccc4	Mol_0603
	COc1cccc(OC)c1CSc(n2N)nnc2-c3cc(OC)ccc3	Mol_0604
	c1cc(F)ccc1CCSc(n2N)nnc2-c3ccc(cc3)OC	Mol_0605
	c1cccc(c12)[nH]c(n2)CSc(n3N)nnc3-c(cc4)ccc4C	Mol_0606
	c1cc(C)ccc1CSc(n2N)nnc2-c3cc(OC)ccc3	Mol_0607
	NC(=O)CSc(n1N)nnc1-c2ccc(cc2)S(=O)(=O)N(CC)CC	Mol_0608
	COc(cc1)c(OC)cc1C(=O)CSc(n2N)nnc2-c3cc(OC)c(cc3)OC	Mol_0609
	c1cccc(c1c23)n(CC)c2cnc(c3)NC(=O)CSc(n4N)nnc4-c5cc(OC)ccc5	Mol_0610
	c1ccccc1Cn(c(=O)[nH]c2=O)c(N)c2N(CCOC)C(=O)CSc(n3N)nnc3-c4ccccc4	Mol_0611
	O=C(O)COC12C(C1)CN(CC2)C(=S)SCCn3c([N+]([O-])=O)cnc3C	Mol_0612
	c1ccccc1CCNC(=O)CSc(n2N)nnc2-c3ccc(Cl)cc3	Mol_0613
	c1ccc(Br)cc1OC(=O)CSc(n2N)nnc2-c(cc3)ccc3C	Mol_0614
	c1ccccc1C(=O)C(c2ccccc2)Sc(n3N)nnc3-c4ccc(cc4)OC	Mol_0615
	CNC(=O)NC(=O)CSc(n1N)nnc1-c2cc(F)ccc2	Mol_0616
	c1cccc(OC)c1C(=O)CSc(n2N)nnc2-c3cc(OC)c(OC)c(c3)OC	Mol_0617
	CC(C)OC(=O)CSc(n1N)nnc1-c2cc(OC)ccc2	Mol_0618
	C1CCCC1NC(=O)CSc(n2N)nnc2-c(cc3C)ccc3	Mol_0619
	O=C(O)c1ccc(cc1)CSc(n2N)nnc2-c3ccc(cc3)OCC	Mol_0620
	c1cccc(c1C)NC(=O)CSc(n2N)nnc2-c(cc3)ccc3C(C)(C)C	Mol_0621
	c1ccc(C)c(c1C)NC(=O)CSc(n2N)nnc2-c3cc(ccc3)OCC	Mol_0622
	C1CCCC=C1CCNC(=O)CSc(n2N)nnc2-c3ccccc3	Mol_0623
	CCOc(cc1)ccc1NC(=O)CSc(n2N)nnc2-c3cc(ccc3)OCC	Mol_0624
	o1cccc1CNC(=O)NNC(=O)CSc(n2N)nnc2-c3ccccc3	Mol_0625
	c1ccccc1N(C)C(=O)CSc(n2N)nnc2-c(cc3C(F)(F)F)ccc3	Mol_0626
	C1CCCCC1N(c(c2C)cc(C)cc2)C(=O)CSc(n3N)nnc3-c4ccccc4	Mol_0627
	Cc1c(C)cnc(c1)NC(=O)CSc(n2N)nnc2-c3cc(OC(F)F)ccc3	Mol_0628
	c1ccccc1-c2nnc(n2N)Sc(c3Cl)cccc3Cl	Mol_0629
	C=C(C)CSc(n1N)nnc1-c2ccc(F)cc2	Mol_0630
	ClC(Cl)(Cl)c1ccc(cc1)Sc(n2N)nnc2-c3ccccc3	Mol_0631
	c1ccccc1-c2nnc(n2N)Sc3cc(Cl)ccc3	Mol_0632
	c1ccccc1C(c2ccccc2)Sc(n3N)nnc3-c4ccc(Cl)cc4	Mol_0633
	C=C(C)CSc(n1N)nnc1-c2ccc(Cl)cc2	Mol_0634
	Cc(c1)ccc(C)c1CSc(n2N)nnc2-c(cc3)ccc3C	Mol_0635
	C1CCCN1CC(=O)OC2CCN(CC2)C(=S)SCCn3c([N+]([O-])=O)cnc3C	Mol_0636
	CC(C)NC(=O)OC1CCN(CC1)C(=S)SCCn2c([N+]([O-])=O)cnc2C	Mol_0637
	C1CCCCN1C(=S)SCCC(=O)OC2CCN(CC2)C(=S)SCCn3c([N+]([O-])=O)cnc3C	Mol_0638
	FC(F)(F)SCC(=O)OC1CCN(CC1)C(=S)SCCn2c([N+]([O-])=O)cnc2C	Mol_0639
	c1ccccc1Cn(c(=O)[nH]c2=O)c(N)c2N(CC)C(=O)CSc(n3N)nnc3-c(cc4)ccc4C	Mol_0640
	O1CCC(C12C)CN(CC2)C(=S)SCCn3c([N+]([O-])=O)cnc3C	Mol_0641
	O=C(O)CSc(n1N)nnc1-c2cc(OC)c(OC)c(c2)OC	Mol_0642
	C=C(C)CSc(n1N)nnc1-c2cc(Cl)ccc2	Mol_0643
	O=C(O)CSc(n1N)nnc1-c2c(OC)cccc2	Mol_0644
	CCCN(CCC)C(=O)CSc(n1N)nnc1-c(cc2)ccc2C	Mol_0645
	COc(cc1)ccc1C(=O)CSc(n2N)nnc2-c3ccc(cc3)OC	Mol_0646
	CN(C)C(=O)CSc(n1N)nnc1-c(cc2)ccc2C(C)(C)C	Mol_0647
	c1ccccc1Cn(c(=O)[nH]c2=O)c(N)c2N(CC)C(=O)CSc(n3N)nnc3-c4cccnc4	Mol_0648
	c1ccccc1C(C(=O)O)Sc(n2N)nnc2-c3cc(F)ccc3	Mol_0649
	COc(cc1)c(OC)cc1C(=O)CSc(n2N)nnc2-c(cc3)ccc3C	Mol_0650
	O=C(O)c1ccc(cc1)OC(=O)CSc(n2N)nnc2-c(cc3)ccc3C	Mol_0651
	Cc1onc(C)c1CSc(n2N)nnc2-c3cccnc3	Mol_0652
	Cc1cc(ccc1)NC(=O)CSc(n2N)nnc2-c(cc3)ccc3C	Mol_0653
	c1ncccc1CSc(n2N)nnc2-c3ccc(cc3)OC	Mol_0654
	CCN(CC)C(=O)CSc(n1N)nnc1-c2ccc(S(=O)(=O)Cl)cc2	Mol_0655
	O=C1CCCN1C(=O)CSc(n2N)nnc2-c(cc3)ccc3C	Mol_0656
	C1COCCN1CCSc(n2N)nnc2-c3c(F)cccc3	Mol_0657
	c1ccnc(Cl)c1NC(=O)CSc(n2N)nnc2-c(cc3)ccc3C	Mol_0658
	c1ccccc1CC(c2ccccc2)Sc(n3N)nnc3-c4cc(OC)ccc4	Mol_0659
	c1ccc(F)cc1CCSc(n2N)nnc2-c3cc(OC)c(OC)c(c3)OC	Mol_0660
	c1ccc(OC)cc1NC(=O)CSc(n2N)nnc2-c3cc(OC)ccc3	Mol_0661
	c1cccc(C)c1C(=O)CSc(n2N)nnc2-c3cc(OC)c(OC)c(c3)OC	Mol_0662
	n1ccccc1NC(=O)CSc(n2N)nnc2-c3cc(OC)c(OC)c(c3)OC	Mol_0663
	Clc1c(Cl)ccc(c1)S(=O)(=O)c(cc2)ccc2OCCSc(n3N)nnc3-c4ccc(Cl)cc4	Mol_0664
	Cc1cc(C)cc(c1)NC(=O)CSc(n2N)nnc2-c3cc(ccc3)OCC	Mol_0665
	c1ccccc1CN(C)C(=O)CSc(n2N)nnc2-c3cc(OC)c(OC)c(c3)OC	Mol_0666
	C1CCCC1NC(=O)CSc(n2N)nnc2-c3cc(OC)ccc3	Mol_0667
	C1CCCCN1CC(=O)OC2CCN(CC2)C(=S)SCCn3c([N+]([O-])=O)cnc3C	Mol_0668
	c1cccc(c1c23)n(CCCC(=O)O)c2ccc(c3)NC(=O)CSc(n4N)nnc4-c(cc5)ccc5C	Mol_0669
	c1ccccc1Cn(c(=O)[nH]c2=O)c(N)c2N(C)C(=O)CSc(n3N)nnc3-c(cc4)ccc4C(C)(C)C	Mol_0670
	O=c1[nH]c(=O)n(CC(C)C)c(N)c1N(CCOC)C(=O)CSc(n2N)nnc2-c3ccccc3	Mol_0671
	C=C(C)CSc(n1N)nnc1-c(cc2)ccc2C(C)(C)C	Mol_0672
	O=C(O)CSc(n1N)nnc1-c2c(F)cccc2	Mol_0673
	COc(c1)cc(OC)cc1-c2nnc(n2N)Sc3ccccc3	Mol_0674
	c1cc(Cl)ccc1C(=O)CSc(n2N)nnc2-c3ccc(Cl)cc3	Mol_0675
	CCN(CC)C(=O)CSc(n1N)nnc1-c2ccc(F)cc2	Mol_0676
	C1CC1NC(=O)CSc(n2N)nnc2-c(cc3)ccc3C	Mol_0677
	c1cc(Cl)ccc1\C=C\CSc(n2N)nnc2-c(cc3)ccc3C	Mol_0678
	O=C(O)CSc(n1N)nnc1-c2ccc(cc2)OC(F)F	Mol_0679
	c1cccc(Cl)c1CSc(n2N)nnc2-c3cc(Cl)ccc3	Mol_0680
	CC(C)OC(=O)CSc(n1N)nnc1-c2ccc(N)cc2	Mol_0681
	NC(=O)CSc(n1N)nnc1-c2ccc(cc2)S(=O)(=O)c3ccc(Cl)cc3	Mol_0682
	CCN(CC)C(=O)CSc(n1N)nnc1-c2ccc(Cl)cc2	Mol_0683
	CC(C)(C)c(cc1)ccc1C(=O)CSc(n2N)nnc2-c(cc3)ccc3C	Mol_0684
	Cc1cc(C)cc(c1)NC(=O)CSc(n2N)nnc2-c(cc3)ccc3C	Mol_0685
	c1ccccc1NC(=O)c2ccc(cc2)-c3nnc(n3N)SC	Mol_0686
	c1ccc(C)c(c1C)NC(=O)CSc(n2N)nnc2-c3ccc(F)cc3	Mol_0687
	CCC(C)NC(=O)CSc(n1N)nnc1-c2ccc(Cl)cc2	Mol_0688
	CCN(CC)C(=O)CSc(n1N)nnc1-c2cc(F)ccc2	Mol_0689
	c1ccc(C)c(c1C)NC(=O)CSc(n2N)nnc2-c3ccc(Cl)cc3	Mol_0690
	s1ccnc1NC(=O)CSc(n2N)nnc2-c(cc3)ccc3C	Mol_0691
	O=C(O)c1ccc(cc1)CSc(n2N)nnc2-c3ccc(cc3)OC	Mol_0692
	c1ccccc1CCSc(n2N)nnc2-c3c(OC)cc(cc3)OC	Mol_0693
	CCOc(cc1)ccc1-c2nnc(n2N)SCc3cnc(N(C)C)nc3	Mol_0694
	COc(cc1)ccc1OCCSc(n2N)nnc2-c3c(F)cccc3	Mol_0695
	CCC1CCN(CC1)C(=S)Sc(n2N)nnc2-c3ccccc3	Mol_0696
	CCN(CC)C(=O)CSc(n1N)nnc1-c2cc(Cl)ccc2	Mol_0697
	c1cccc(Cl)c1NC(=O)CSc(n2N)nnc2-c3ccc(Cl)cc3	Mol_0698
	c1ccccc1/C=C(\c2ccc(Br)cc2)Sc(n3N)nnc3-c(cc4)ccc4C	Mol_0699
	Cc1cc(ccc1)N(C)C(=O)CSc(n2N)nnc2-c(cc3)ccc3C	Mol_0700
	O=C(O)C1CCN(CC1)C(=O)CSc(n2N)nnc2-c(cc3)ccc3C	Mol_0701
	c1cccc(OC)c1C(=O)CSc(n2N)nnc2-c3cc(Cl)ccc3	Mol_0702
	COc(cc1)ccc1NC(=O)CSc(n2N)nnc2-c3cc(OC)ccc3	Mol_0703
	c1cccc(OC)c1NC(=O)CSc(n2N)nnc2-c3cc(OC)c(cc3)OC	Mol_0704
	c1cccc(c12)N(CCC2)C(=O)CSc(n3N)nnc3-c(cc4)ccc4C	Mol_0705
	Cc1ncc([N+]([O-])=O)n1CCS(=O)(=O)NCC2CCCO2	Mol_0706
	c1cccc(c12)[nH]c(n2)CSc(n3N)nnc3-c4ccc(cc4)S(=O)(=O)N	Mol_0707
	c1ccccc1C(=O)NNC(=O)CSc(n2N)nnc2-c3cc(F)ccc3	Mol_0708
	c1cccc(OC)c1NC(=O)CSc(n2N)nnc2-c3ccc(F)cc3	Mol_0709
	c1cccc(c1C)NC(=O)CSc(n2N)nnc2-c3cc(F)ccc3	Mol_0710
	c1ccccc1CN(CC)CCSc(n2N)nnc2-c3c(OCC)cccc3	Mol_0711
	O=c1n(C)c(=O)n(C)c(N)c1C(=O)CSc(n2N)nnc2-c3ccc(F)cc3	Mol_0712
	c1cccc(OCC)c1-c2nnc(c(N)c2C)Sc(n3N)nnc3-c4ccccc4	Mol_0713
	O=C(O)c1cc(ccc1)CSc(n2N)nnc2-c3ccc(cc3)OC	Mol_0714
	COc(c1)cc(OC)cc1NC(=O)CSc(n2N)nnc2-c3cc(OC)ccc3	Mol_0715
	c1ccccc1CCNC(=O)CSc(n2N)nnc2-c3cc(OC)c(OC)c(c3)OC	Mol_0716
	c1cccc(c12)CCCC2NC(=O)CSc(n3N)nnc3-c(cc4)ccc4C	Mol_0717
	CCOc(ccc1)cc1-c2nnc(n2N)SCc(n3)[nH]c(c34)cccc4	Mol_0718
	c1ncccc1NC(=O)CSc(n2N)nnc2-c3cc(OC)ccc3	Mol_0719
	COc(cc1)c(OC)cc1C(=O)CSc(n2N)nnc2-c3cc(ccc3)OC(C)C	Mol_0720
	c1ccccc1CCN(C(=O)C)C(=O)CSc(n2N)nnc2-c3ccc(cc3)OC	Mol_0721
	CC(=O)Nc(c1)ccc(OC)c1NC(=O)NC(=O)CSc(n2N)nnc2-c3ccccc3	Mol_0722
	c1c(N)ccc(c12)Sc3c(cccc3)N2C(=O)CSc(n4N)nnc4-c5ccc(cc5)OC	Mol_0723
	COc(cc1)c(OC)cc1C(C2CC)N(CCC2)C(=O)CSc(n3N)nnc3-c4ccccc4	Mol_0724
	c1ccccc1Cn(c(=O)[nH]c2=O)c(N)c2N(CC)C(=O)CSc(n3N)nnc3-c4ccc(Cl)cc4	Mol_0725
	C1CCCCN1CCC(=O)OC2CCN(CC2)C(=S)SCCn3c([N+]([O-])=O)cnc3C	Mol_0726
	c1ccccc1Cn(c(=O)[nH]c2=O)c(N)c2N(CC)C(=O)CSc(n3N)nnc3-c4ccc(F)cc4	Mol_0727
	ClC(Cl)(Cl)C(=O)NC(=O)C1CCCN1C(=S)SCCn2c([N+]([O-])=O)cnc2C	Mol_0728
	c1ccccc1Cn(nn2)c(N)c2N(CC)C(=O)CSc(n3N)nnc3-c4cc(F)ccc4	Mol_0729
	c1ccccc1Cn(c(=O)[nH]c2=O)c(N)c2N(C)C(=O)CSc(n3N)nnc3-c4cc(Cl)ccc4	Mol_0730
	Cc1ccc(cc1)-c2nnc(n2N)SC	Mol_0731
	FC(F)Oc(cc1)ccc1C(SCC2=O)N2C(=S)SCCn3c([N+]([O-])=O)cnc3C	Mol_0732
	N#CCSc(n1N)nnc1-c2ccc(F)cc2	Mol_0733
	N#CCSc(n1N)nnc1-c2ccc(Cl)cc2	Mol_0734
	C=C(C)CSc(n1N)nnc1-c2ccc(cc2)OC	Mol_0735
	c1cccc(c12)[nH]c(n2)Sc(n3N)nnc3-c4ccccc4	Mol_0736
	c1cc(F)ccc1CSc(n2N)nnc2-c3cc(F)ccc3	Mol_0737
	c1ccccc1-c2nnc(n2N)Sc(c3Cl)cc(Cl)cc3Cl	Mol_0738
	CC(C)OC(=O)CSc(n1N)nnc1-c2ccc(Cl)cc2	Mol_0739
	CCN(CC)C(=O)CSc(n1N)nnc1-c(cc2)ccc2C(C)(C)C	Mol_0740
	C1COCCN1C(=O)CSc(n2N)nnc2-c(cc3)ccc3C	Mol_0741
	Cc(c1)c(C)c(C)cc1C(=O)CSc(n2N)nnc2-c3ccncc3	Mol_0742
	c1cccc(c12)nnc(n2)CSc(n3N)nnc3-c4ccc(Cl)cc4	Mol_0743
	O=C(O)c1ccc(cc1)CSc(n2N)nnc2-c3ccc(Cl)cc3	Mol_0744
	c1ccccc1CCC(c2ccccc2)(c3ccccc3)Sc(n4N)nnc4-c(cc5)ccc5C	Mol_0745
	NC(=O)CSc(n1N)nnc1-c2cc(ccc2)S(=O)(=O)N(CC)CC	Mol_0746
	COc(cc1)c(OC)cc1C(=O)CSc(n2N)nnc2-c3cc(OC)c(OC)c(c3)OC	Mol_0747
	COc(c1)c(OC)c(OC)cc1CSc(n2N)nnc2-c3cc(OC)ccc3	Mol_0748
	O=C(O)c1ccc(cc1)CSc(n2N)nnc2-c3cc(Cl)ccc3	Mol_0749
	c1cccc(F)c1CSc(n2N)nnc2-c3cc(OC)c(OC)c(c3)OC	Mol_0750
	CC(C)OC(=O)CSc(n1N)nnc1-c2cc(Cl)ccc2	Mol_0751
	O=C(O)c1cc(ccc1)CSc(n2N)nnc2-c3ccc(Cl)cc3	Mol_0752
	c1ccccc1C(C(=O)O)Sc(n2N)nnc2-c3ccc(cc3)OC(F)F	Mol_0753
	C1CCCC1NC(=O)CSc(n2N)nnc2-c(c3C)cccc3	Mol_0754
	c1ccc(C)c(c1C)NC(=O)CSc(n2N)nnc2-c(cc3)ccc3C(C)(C)C	Mol_0755
	c1nc(N)nc(c1C(F)(F)F)CSc(n2N)nnc2-c(cc3)ccc3C	Mol_0756
	Cc(c1)ccc(C)c1CSc(n2N)nnc2-c3cc(OC)ccc3	Mol_0757
	CC(C)OC(=O)CSc(n1N)nnc1-c2cc(F)ccc2	Mol_0758
	COc(cc1)c(OC)cc1C(=O)CSc(n2N)nnc2-c3ccc(cc3)OC	Mol_0759
	CC(C)NC(=O)CSc(n1N)nnc1-c2cc(Cl)ccc2	Mol_0760
	CCCN(CCC)C(=O)CSc(n1N)nnc1-c2ccc(cc2)S(=O)(=O)C	Mol_0761
	c1cccc(F)c1C(=O)CSc(n2N)nnc2-c3cc(OC)c(OC)c(c3)OC	Mol_0762
	CCOc(cc1)ccc1-c2nnc(n2N)SCc(n3)[nH]c(c34)cccc4	Mol_0763
	c1ccc(C)cc1COC(=O)CSc(n2N)nnc2-c3cc(OC)ccc3	Mol_0764
	c1cccc(OC)c1NC(=O)CSc(n2N)nnc2-c3cc(OC)c(OC)c(c3)OC	Mol_0765
	c1cccc(c1C)NC(=O)NC(=O)CSc(n2N)nnc2-c3ccc(F)cc3	Mol_0766
	c1cccc(OC)c1NC(=O)CSc(n2N)nnc2-c3ccc(Cl)cc3	Mol_0767
	COc(cc1)ccc1N(C)C(=O)CSc(n2N)nnc2-c3cc(OC)ccc3	Mol_0768
	CCOC(=O)C1CCN(CC1)C(=S)Sc(n2N)nnc2-c3ccccc3	Mol_0769
	C1CCCCC1NC(=O)CSc(n2N)nnc2-c3cc(ccc3)OCC	Mol_0770
	CN(C)C(=O)c1ccc(cc1)CSc(n2N)nnc2-c3cc(ccc3)OCC	Mol_0771
	c1cccc(c1C(F)(F)F)NC(=O)CSc(n2N)nnc2-c3ccc(cc3)S(=O)(=O)c4ccccc4	Mol_0772
	O1CCCC1CNC(=O)C(C)Sc(n2N)nnc2-c3ccccc3	Mol_0773
	c1ccccc1CCN(C)C(=O)CSc(n2N)nnc2-c3cc(OC)c(OC)c(c3)OC	Mol_0774
	COc(cc1)ccc1NC(=O)CSc(n2N)nnc2-c3cc(ccc3)OCC	Mol_0775
	COc(c1)cc(OC)cc1NC(=O)CSc(n2N)nnc2-c3cc(ccc3)OCC	Mol_0776
	O=C(O)c1ccc(cc1)SCC(=O)NNC(=O)CSc(n2N)nnc2-c3cc(OC)ccc3	Mol_0777
	c1cccc(c1C(=O)O)NC(=O)CSc(n2N)nnc2-c3cc(OC)c(OC)c(c3)OC	Mol_0778
	O1CCCC1CNC(=O)CSc(n2N)nnc2-c3ccc(cc3)S(=O)(=O)c4ccccc4	Mol_0779
	c1ccccc1CC2CCN(CC2)C(=O)CSc(n3N)nnc3-c4cc(OC)ccc4	Mol_0780
	C1COCCN1CC(=O)OC2CCN(CC2)C(=S)SCCn3c([N+]([O-])=O)cnc3C	Mol_0781
	c1ccccc1Cn(c(=O)[nH]c2=O)c(N)c2N(C)C(=O)CSc(n3N)nnc3-c4cc(F)ccc4	Mol_0782
	Cc1ncc([N+]([O-])=O)n1CCNC(=O)c2ccc(o2)-c3c(cccc3)S(=O)(=O)N(CC)CC	Mol_0783
	c1cc([N+]([O-])=O)cc(c12)n(C)c(n2)NC(=O)CSc(n3N)nnc3-c4c(Cl)cccc4	Mol_0784
	Cc1cc(ccc1)-c2nnc(n2N)SCC(=O)N(CC)c3c(N)n(c(=O)[nH]c3=O)Cc4ccccc4	Mol_0785
	c1ccccc1Cn(c(=O)[nH]c2=O)c(N)c2N(CC(C)C)C(=O)CSc(n3N)nnc3-c(cc4)ccc4C	Mol_0786
	CC(O)C(N)C(=O)NCC1N(CCCO1)C(=S)SCCn2c([N+]([O-])=O)cnc2C	Mol_0787
	c1ccccc1C(c2ccccc2)Sc(n3N)nnc3-c4cc(F)ccc4	Mol_0788
	c1ccccc1C(c2ccccc2)Sc(n3N)nnc3-c4cc(Cl)ccc4	Mol_0789
	NC(=O)CSc(n1N)nnc1-c2cc(OC)c(OC)c(c2)OC	Mol_0790
	CCN(CC)C(=O)CSc(n1N)nnc1-c2ccc(cc2)OC	Mol_0791
	CCCN(CCC)C(=O)CSc(n1N)nnc1-c2ccc(F)cc2	Mol_0792
	CC(C)OC(=O)CSc(n1N)nnc1-c(cc2)ccc2C(C)(C)C	Mol_0793
	COc(cc1)ccc1NC(=O)CSc(n2N)nnc2-c3ccc(cc3)OC	Mol_0794
	c1ccc(C)cc1CSc(n2N)nnc2-c3cc(OC)c(cc3)OC	Mol_0795
	Cc1ccc(cc1)NC(=O)CSc(n2N)nnc2-c3ccc(F)cc3	Mol_0796
	CC(C)NC(=O)CSc(n1N)nnc1-c(cc2)ccc2C(C)(C)C	Mol_0797
	CCOc(cc1)ccc1-c2nnc(n2N)SCc3ccc(F)cc3	Mol_0798
	CC1(C)CC(CCO1)Cn2c([N+]([O-])=O)cnc2C	Mol_0799
	Cc1cccc(C)c1CSc(n2N)nnc2-c3cc(OC)c(OC)c(c3)OC	Mol_0800
	CCCN(CCC)C(=O)CSc(n1N)nnc1-c2ccc(Cl)cc2	Mol_0801
	CC(C)OC(=O)CSc(n1N)nnc1-c2ccc(cc2)OC	Mol_0802
	CC(C)OC(=O)CSc(n1N)nnc1-c(cc2)ccc2C(C)(C)C	Mol_0803
	COC(=O)c1c(cccc1)S(=O)(=O)n2c([N+]([O-])=O)cnc2C	Mol_0804
	c1ccc(C)cc1CSc(n2N)nnc2-c3ccc(cc3)OC	Mol_0805
	c1ccc(C)c(c1C)NC(=O)CSc(n2N)nnc2-c3cc(F)ccc3	Mol_0806
	O=C(O)c1ccc(cc1)CSc(n2N)nnc2-c3cc(OC)c(cc3)OC	Mol_0807
	c1ccc(C)c(c1C)NC(=O)CSc(n2N)nnc2-c3cc(Cl)ccc3	Mol_0808
	CCCN(CCC)C(=O)CSc(n1N)nnc1-c2cc(Cl)ccc2	Mol_0809
	c1cccc(c12)[nH]c(n2)CSc(n3N)nnc3-c4ccc(cc4)OC	Mol_0810
	n1oc(C)cc1CSc(n2N)nnc2-c3cc(OC)ccc3	Mol_0811
	C1CCCC1NC(=O)CSc(n2N)nnc2-c(cc3)ccc3C(C)(C)C	Mol_0812
	Cc1cc(c(O)cc1)NC(=O)CSc(n2N)nnc2-c(cc3C)ccc3	Mol_0813
	c1ccccc1C(O)(c2ccccc2)CSc(n3N)nnc3-c4ccc(cc4)OC(F)F	Mol_0814
	c1ccccc1NC(=O)CSc(n2N)nnc2-c3c(OCC)cccc3	Mol_0815
	c1ccc(Cl)cc1N(C)C(=O)CSc(n2N)nnc2-c3cc(Cl)ccc3	Mol_0816
	c1ccccc1CC(c2ccccc2)Sc(n3N)nnc3-c4cc(OC)c(cc4)OC	Mol_0817
	c1ccc(O)cc1NC(=O)CSc(n2N)nnc2-c(cc3C)ccc3	Mol_0818
	c1cccc(c1C)NC(=O)CSc(n2N)nnc2-c3cc(OC)c(OC)c(c3)OC	Mol_0819
	c1cccc(F)c1Cc2nnc(n2N)SCC(=O)NNC(=O)CSc(n3N)nnc3-c4ccc(Cl)cc4	Mol_0820
	c1cccc(c12)[nH]c(n2)CSc(n3N)nnc3-c4cc(OC)ccc4	Mol_0821
	C1COCCN1C(=O)CSc(n2N)nnc2-c3cc(OC)ccc3	Mol_0822
	c1ccc(Br)cc1C(=O)CSc(n2N)nnc2-c3cc(OC)c(OC)c(c3)OC	Mol_0823
	c1cccc(c12)[nH]cc2C(=O)C(c3ccccc3)Sc(n4N)nnc4-c(cc5)ccc5C	Mol_0824
	CC(=O)c1ccc(cc1)NC(=O)CSc(n2N)nnc2-c3cc(Cl)ccc3	Mol_0825
	Cc(c1)cc(C)c(c1C)NC(=O)CSc(n2N)nnc2-c3cc(OC)ccc3	Mol_0826
	c1cccc(c12)NC(=O)CN2C(=O)CSc(n3N)nnc3-c(cc4)ccc4C	Mol_0827
	CNC(=O)CSc(n1N)nnc1-c2cc(cnc2)-c3c(OC)cccc3	Mol_0828
	c1cccc(c12)NC(=O)C(C)(C)N2C(=O)CSc(n3N)nnc3-c(cc4)ccc4C	Mol_0829
	c1ccccc1CCCNC(=O)CSc(n2N)nnc2-c3cc(OC)c(OC)c(c3)OC	Mol_0830
	C1CCCCC1N(C)C(=O)CSc(n2N)nnc2-c3cc(ccc3)OCC	Mol_0831
	c1ccccc1CC2CCN(CC2)C(=O)CSc(n3N)nnc3-c4ccc(cc4)OC	Mol_0832
	s1ccnc1NC(=O)CSc(n2N)nnc2-c3cc(ccc3)OCC	Mol_0833
	CCOc1c(OCC)ccc(c1)NC(=O)CSc(n2N)nnc2-c3cc(OC)ccc3	Mol_0834
	Clc1cccc(F)c1NC(=O)CSc(n2N)nnc2-c3ccc(cc3)S(=O)(=O)c4ccccc4	Mol_0835
	c1ccccc1C(O)(C(=O)O)CSc(n2N)nnc2-c3cc(ccc3)S(=O)(=O)N(CC)CC	Mol_0836
	c1cccc(c12)N(CCC2)C(=O)CSc(n3N)nnc3-c4ccc(cc4)S(=O)(=O)c5ccccc5	Mol_0837
	c1ccccc1Cn(c(=O)[nH]c2=O)c(N)c2N(CC)C(=O)CSc(n3N)nnc3-c(cc4)ccc4C(C)(C)C	Mol_0838
	COc(cc1)ccc1-c2nnc(n2N)SCC(=O)Nc(c3)ccc4n(c(c5c34)cccc5)CCc6ccccc6	Mol_0839
	c1cccc(c12)CCCC2NC(=O)CSc(n3N)nnc3-c4cc(ccc4)OCC	Mol_0840
	C1COCCN1CCC(=O)OC2CCN(CC2)C(=S)SCCn3c([N+]([O-])=O)cnc3C	Mol_0841
	c1ccccc1Cn(c(=O)[nH]c2=O)c(N)c2N(CCOC)C(=O)CSc(n3N)nnc3-c4ccc(Br)cc4	Mol_0842
	CC(C)c1ccc(cc1)NC(=O)CSc(n2N)nnc2-c(cc3)ccc3C	Mol_0843
	C=C(C)CSc(n1N)nnc1-c2cc(OC)c(cc2)OC	Mol_0844
	Cc1cc(ccc1)NC(=O)CSc(n2N)nnc2-c3ccc(Cl)cc3	Mol_0845
	COc1c(OC)ccc(c1)NC(=O)CSc(n2N)nnc2-c3cc(OC)ccc3	Mol_0846
	c1cccc(c1c23)n(CC)c2ccc(c3)NC(=O)CSc(n4N)nnc4-c5ccc(cc5)OCC	Mol_0847
	c1cc(Br)ccc1C(=O)CSc(n2N)nnc2-c3cc(OC)c(OC)c(c3)OC	Mol_0848
	CCOc(cc1)ccc1NC(=O)CSc(n2N)nnc2-c3cc(ccc3)OC(C)C	Mol_0849
	c1ccccc1CC2CCN(CC2)C(=O)CSc(n3N)nnc3-c4ccc(Cl)cc4	Mol_0850
	c1ccnc(Cl)c1NC(=O)CSc(n2N)nnc2-c3ccc(Cl)cc3	Mol_0851
	CCSc(n1N)nnc1-c2cc(OC)c(OC)c(c2)OC	Mol_0852
	c1ccccc1Cn(c(=O)[nH]c2=O)c(N)c2N(CC)C(=O)CSc(n3N)nnc3-c4cc(Cl)ccc4	Mol_0853
	c1cc(Cl)ccc1NC(=O)CSc(n2N)nnc2-c3ccc(Cl)cc3	Mol_0854
	c1cccc(c12)oc(=O)cc2CSc(n3N)nnc3-c4ccc(cc4)OC	Mol_0855
	c1ccccc1CC(c2ccccc2)Sc(n3N)nnc3-c4cc(OC)c(OC)c(c4)OC	Mol_0856
	Cc1cc(ccc1)N(CC2)CCN2C(=O)CSc(n3N)nnc3-c(cc4)ccc4C	Mol_0857
	Cc1c(C)cccc1NC(=O)CSc(n2N)nnc2-c3ccc(Cl)cc3	Mol_0858
	c1ccccc1Cn(c(=O)[nH]c2=O)c(N)c2N(CCOC)C(=O)CSc(n3N)nnc3-c(cc4)ccc4C	Mol_0859
	c1cccc(c12)cc3c(cccc3)c2NC(=O)CSc(n4N)nnc4-c5ccc(cc5)S(=O)(=O)c6ccc(Br)cc6	Mol_0860
	NC(=O)CSc(n1N)nnc1-c2ccc(cc2)OC(F)F	Mol_0861
	c1cc(Cl)cc(Cl)c1C(O)(Cn2cncn2)CSc(n3N)nnc3-c4ccccc4	Mol_0862
	CCCN(CCC)C(=O)CSc(n1N)nnc1-c2ccc(N(C)C)nc2	Mol_0863
	CC(C)CNC(=O)CSc(n1N)nnc1-c2ccc(Cl)cc2	Mol_0864
	Cc1cc(ccc1)OC(=O)CSc(n2N)nnc2-c3cc(OC)c(cc3)OC	Mol_0865
	c1ccccc1Cn(c(=O)[nH]c2=O)c(N)c2N(CC)C(=O)CSc(n3N)nnc3-c4ccc(cc4)OC	Mol_0866
	Cc1cc(ccc1)NC(=O)CSc(n2N)nnc2-c3cc(ccc3)OC(C)C	Mol_0867
	c1cccc(c12)nnc(n2)NC(=O)CSc(n3N)nnc3-c4cc(Cl)ccc4	Mol_0868
	CNC(=O)CSc(n1N)nnc1-c2c(OCC)cccc2	Mol_0869
	C1CCCCC1NC(=O)CSc(n2N)nnc2-c(cc3)ccc3C(C)(C)C	Mol_0870
	O=C(O)CSc(n1N)nnc1-c2c(Cl)cccc2Cl	Mol_0871
	C1CCCC1NC(=O)CSc(n2N)nnc2-c3ccc(cc3)OC	Mol_0872
	COc1c(OC)ccc(c1)NC(=O)CSc(n2N)nnc2-c3cc(ccc3)OCC	Mol_0873
	Nc1nc(N)nc(c1C)CSc(n2N)nnc2-c(cc3)ccc3C	Mol_0874
	Cc1ccc(cc1)NC(=O)CSc(n2N)nnc2-c(c3C)cccc3	Mol_0875
	CC(C)(C)c1ccc(cc1)NC(=O)CSc(n2N)nnc2-c(cc3)ccc3C	Mol_0876
	NC(=O)CSc(n1N)nnc1-c2cc(ccc2)S(=O)(=O)N(C)CC	Mol_0877
	c1ccccc1CNC(=O)NC(=O)CSc(n2N)nnc2-c3ccc(cc3)S(=O)(=O)c4ccc(Cl)cc4	Mol_0878
	c1ccc(Cl)cc1-c2nnc(n2N)Sc3ccccc3	Mol_0879
	Cc1ncc([N+]([O-])=O)n1CC(=O)c2cc(C)c(c(C)c2)OC(C)C	Mol_0880
	CC(C)(C)c1ccc(cc1)CSc(n2N)nnc2-c3ccc(Cl)cc3	Mol_0881
	c1cccc(c12)cc(F)cc2CSc(n3N)nnc3-c4ccc(cc4)OC	Mol_0882
	ONC(=O)c1ccc(cc1)CSc(n2N)nnc2-c3ccc(cc3)OC	Mol_0883
	Cc1ccc(cc1)NC(=O)CSc(n2N)nnc2-c(cc3)ccc3C(C)(C)C	Mol_0884
	c1cccc(c1C)Nc(nc(n2)N)nc2CCSc(n3N)nnc3-c4ccc(cc4)OC	Mol_0885
	O=C(O)CSc(n1N)nnc1-c2cc(c(cc2)OC(F)F)OCC3CC3	Mol_0886
	O=C(O)c1ccc(cc1)CSc(n2N)nnc2-c3cc(OC)c(OC)c(c3)OC	Mol_0887
	Cc1c(C)ccc(c1)NC(=O)CSc(n2N)nnc2-c(cc3)ccc3C	Mol_0888
	O=CCSc(n1N)nnc1-c2c(N)cccc2	Mol_0889
	CC1CCCCN1CC(=O)OC2CCN(CC2)C(=S)SCCn3c([N+]([O-])=O)cnc3C	Mol_0890
	Cc1cc(no1)NC(=O)CSc(n2N)nnc2-c(cc3)ccc3C	Mol_0891
	CCCN(CCC)C(=O)CSc(n1N)nnc1-c(cc2)ccc2C(C)(C)C	Mol_0892
	C=C(C)CSc(n1N)nnc1-c2c(O)cccc2	Mol_0893
	CC(C)Oc(ccc1)cc1-c2nnc(n2N)SCc3cc(C)c(c(C)c3)OCCSc(n4N)nnc4-c5c(F)cccc5	Mol_0894
	c1ccccc1Cn(c(=O)[nH]c2=O)c(N)c2N(C)C(=O)CSc(n3N)nnc3-c4cc(OC(F)F)c(cc4)OC(F)F	Mol_0895
	c1c(Cl)ccc(Cl)c1C(O)(Cn2cncn2)CSc(n3N)nnc3-c4ccccc4	Mol_0896
	c1cccc(c1c23)n(CCC)c2ccc(c3)NC(=O)CSc(n4N)nnc4-c(cc5)ccc5C(C)(C)C	Mol_0897
	c1ccc(Cl)cc1C2(C#N)CCN(C(C23)CCC3)C(=S)SCCn4c([N+]([O-])=O)cnc4C	Mol_0898
	COc(c1)cc(cc1C)NC(=O)CSc(n2N)nnc2-c3cc(OC)ccc3	Mol_0899
	c1ccccc1C(=O)NNC(=O)CSc(n2N)nnc2-c3ccc(cc3)OC(F)F	Mol_0900
	Cc1ccc(cc1)NC(=O)CSc(n2N)nnc2-c3cc(OCC)c(cc3)OCC	Mol_0901
	ClC(Cl)(Cl)c1cc(on1)CSc(n2N)nnc2-c3ccc(Cl)cc3	Mol_0902
	Cc1onc(C)c1CSc(n2N)nnc2-c3cc(OC)ccc3	Mol_0903
	Cc1ccc([N+]([O-])=O)n1CCSc(cc2)ccc(c23)nnc3-c4cc(OC)c(OC)c(c4)OC	Mol_0904
	COC(=O)/C(=C/OC)c1c(cccc1)CSc(n2N)nnc2-c(cc3)ccc3C	Mol_0905
	c1ccccc1CCn(c(=O)[nH]c2=O)c(N)c2N(CC(C)C)C(=O)CSc(n3N)nnc3-c4ccc(cc4)OC	Mol_0906
	c1ccccc1CCn(c(=O)[nH]c2=O)c(N)c2N(CC)C(=O)CSc(n3N)nnc3-c4cc(OC)c(OC)c(c4)OC	Mol_0907
	c1ccccc1Cn(c(=O)[nH]c2=O)c(N)c2N(C)C(=O)CSc(n3N)nnc3-c4ccc(cc4)OC(F)F	Mol_0908
	c1ccccc1Cn(c(=O)[nH]c2=O)c(N)c2N(CC)C(=O)CSc(n3N)nnc3-c4cc(F)ccc4	Mol_0909
	c1cccc(c1c23)n(CC)c2ccc(c3)NC(=O)CSc(n4N)nnc4-c5cc(OC)ccc5	Mol_0910
	c1cccc(c12)CCCC2NC(=O)CSc(n3N)nnc3-c4cc(OC)ccc4	Mol_0911
	c1cccc(c12)CCCC2NC(=O)CSc(n3N)nnc3-c4cc(OCC)c(cc4)OCC	Mol_0912
	c1cccc(c1C)NC(=O)c2ccc(cc2)CSc(n3N)nnc3-c4ccc(cc4)OCC	Mol_0913
	c1ccccc1CC2CCN(C2)C(=O)CSc(n3N)nnc3-c4ccc(cc4)OC	Mol_0914
	C1COCCN1c(cc2)ccc2NC(=O)CSc(n3N)nnc3-c4ccc(cc4)S(=O)(=O)c5ccccc5	Mol_0915
	c1cccc(c1C(F)(F)F)NC(=O)CSc(n2N)nnc2-c3ccc(cc3)S(=O)(=O)c4ccc(Br)cc4	Mol_0916
	c1ccnc(Cl)c1NC(=O)CSc(n2N)nnc2-c3cc(ccc3)OCC	Mol_0917
	CC1CN(CCO1)C(=O)CSc(n2N)nnc2-c3cc(OC)ccc3	Mol_0918
	Cc1ncc([N+]([O-])=O)n1NC(=O)CSc(o2)nnc2-c3c(OC)cccc3	Mol_0919
	c1ccccc1CCN(C(C)C)C(=O)CSc(n2N)nnc2-c3cc(OC)c(OC)c(c3)OC	Mol_0920
	c1cccc(c1C(C)C)-c(nn2)cc(N)c2CSc(n3N)nnc3-c4cc(OC)c(OC)c(c4)OC	Mol_0921
	COc1c(OC)cc(cc1OC)NC(=O)CSc(n2N)nnc2-c3cc(ccc3)OCC	Mol_0922
	c1cccc(F)c1NC(=O)CSc(n2N)nnc2-c3cc(OC)c(OC)c(c3)OC	Mol_0923
	c1cccc(c12)n(C)c(N)c(c2=O)C(=O)CSc(n3N)nnc3-c4c(F)cccc4	Mol_0924
	c1cccc(c12)[nH]c(n2)CSc(n3N)nnc3-c4ccc(cc4)S(=O)(=O)c5ccc(Cl)cc5	Mol_0925
	c1cccc(OC)c1NC(=O)CSc(n2N)nnc2-c3cc(Cl)ccc3	Mol_0926
	c1cccc(c12)N(C)C(N)C(C2=O)C(=O)CSc(n3N)nnc3-c4c(F)cccc4	Mol_0927
	Cc1cc(ccc1)NC(=O)CSc(n2N)nnc2-c3cc(OC(F)F)ccc3	Mol_0928
	c1ccccc1CCNC(=O)CSc(n2N)nnc2-c3ccc(cc3)OC(F)F	Mol_0929
	O=C(O)c1ccc(cc1)CSc(n2N)nnc2-c3cc(ccc3)S(=O)(=O)N(C)C	Mol_0930
	CC(C)(C)c1ccc(cc1)NC(=O)CSc(n2N)nnc2-c3cc(OC)ccc3	Mol_0931
	NC(=O)CSc(n1N)nnc1-c2cc(OC(F)F)cc(c2)S(=O)(=O)c3ccccc3	Mol_0932
	c1cccc(c12)nc(Cl)cc2NC(=O)CSc(n3N)nnc3-c4ccc(Cl)cc4	Mol_0933
	o1cccc1CNC(=O)CSc(n2N)nnc2-c3ccc(cc3)S(=O)(=O)C	Mol_0934
	O=C1CCCN1C(=O)CSc(n2N)nnc2-c3ccc(cc3)OC	Mol_0935
	C1CCCCC1NC(=O)CSc(n2N)nnc2-c3ccc(cc3)OC	Mol_0936
	c1ccc(OC)cc1C(=O)CSc(n2N)nnc2-c3cc(OC)c(cc3)OC	Mol_0937
	CCN(CC)C(=O)CSc(n1N)nnc1-c2cc(ccc2)S(=O)(=O)N(CC)CC	Mol_0938
	Fc1c(Cl)nn(c1)CCSc(n2-c(c3N)cccc3)nnc2-c4ccccc4	Mol_0939
	c1ccc(OC)cc1NC(=O)CSc(n2N)nnc2-c3cc(OC)cc(c3)OC	Mol_0940
	c1ccc(OC)cc1NC(=O)CSc(n2N)nnc2-c3ccc(cc3)OC	Mol_0941
	c1cccc(c12)ccc(Cl)c2NC(=O)CSc(n3N)nnc3-c4ccc(Cl)cc4	Mol_0942
	C1CCCC1NC(=O)CSc(n2N)nnc2-c3ccc(cc3)OCC	Mol_0943
	Clc1cccc(Cl)c1CSc(n2N)nnc2-c3cc(ccc3)S(=O)(=O)N(C)C	Mol_0944
	Cc1cc(C)cc(c1)NC(=O)CSc(n2N)nnc2-c3ccc(cc3)OCC	Mol_0945
	C1CCCCCC1NC(=O)CSc(n2N)nnc2-c3ccc(cc3)OC	Mol_0946
	COc(cc1)ccc1C(=O)CSc(n2N)nnc2-c3cc(F)ccc3	Mol_0947
	Cc1c(C)cccc1NC(=O)CSc(n2N)nnc2-c(cc3)ccc3C(C)(C)C	Mol_0948
	CC(C)NC(=O)CSc(n1N)nnc1-c2ccc(cc2)S(=O)(=O)c(cc3)ccc3F	Mol_0949
	c1cccc(c12)[nH]c(n2)CSc(n3N)nnc3-c4cc(OC)cc(c4)OC	Mol_0950
	C1CC1NC(=O)CSc(n2N)nnc2-c(cc3)ccc3C(C)(C)C	Mol_0951
	CCN(CC)C(=O)CSc(n1N)nnc1-c2cc(OC)c(cc2)OC	Mol_0952
	COc(cc1)ccc1C(=O)CSc(n2N)nnc2-c3ccc(F)cc3	Mol_0953
	CC(C)CNC(=O)CSc(n1N)nnc1-c(cc2)ccc2C(C)(C)C	Mol_0954
	c1cccc(c12)[nH]c(n2)CSc(n3N)nnc3-c4ccc(Cl)cc4	Mol_0955
	Cc1c(C)cccc1NC(=O)CSc(n2N)nnc2-c(c3C)cccc3	Mol_0956
	COc(cc1)ccc1NC(=O)CSc(n2N)nnc2-c(cc3)ccc3C	Mol_0957
	Cc1c(C)cc(O)c(c1)NC(=O)CSc(n2N)nnc2-c(cc3)ccc3C	Mol_0958
	Cc1cc(C)cc(c1)NC(=O)CSc(n2N)nnc2-c(c3C)cccc3	Mol_0959
	c1ccc(C)cc1CSc(n2N)nnc2-c3cc(OC)c(OC)c(c3)OC	Mol_0960
	C1CCCC1NC(=O)CSc(n2N)nnc2-c3ccc(Cl)cc3	Mol_0961
	c1ccccc1N(C)C(=O)CSc(n2N)nnc2-c3c(F)cccc3	Mol_0962
	COC(=O)c1c(cccc1)Sc(n2N)nnc2-c3ccc(Cl)cc3	Mol_0963
	CCCN(CC)C(=O)CSc(n1N)nnc1-c2ccc(Cl)cc2	Mol_0964
	C1CCCC1N(CC)C(=O)CSc(n2N)nnc2-c(cc3)ccc3C	Mol_0965
	COc(cc1)ccc1C(=O)CSc(n2N)nnc2-c(c3C)cccc3	Mol_0966
	OC(O)(O)CSc(n1N)nnc1-c2ccc(cc2)OC(F)F	Mol_0967
	c1cccc(Cl)c1C(=O)c2ccc(cc2)-c3nnc(n3N)SC	Mol_0968
	Cc1onc(C)c1CSc(n2N)nnc2-c3ccc(N)cc3	Mol_0969
	CCN(CC)C(=O)CSc(n1N)nnc1-c2c(O)cccc2	Mol_0970
	N#CCSc(n1N)nnc1-c2c(Cl)cccc2	Mol_0971
	c1ccccc1C(c2ccccc2)Sc(n3N)nnc3-c4cc(Cl)cc(Cl)c4	Mol_0972
	O=C1CSC(=O)N1CC(=O)OC2CCN(CC2)C(=S)SCCn3c([N+]([O-])=O)cnc3C	Mol_0973
	c1ccccc1Cn(c(=O)[nH]c2=O)c(N)c2N(CCOC)C(=O)CSc(n3N)nnc3-c4ccc(F)cc4	Mol_0974
	c1cc(Cl)ccc1C(\c2c(C)nccc2)=C/C3CCN(CC3)C(=O)CSc(n4N)nnc4-c5ccccc5	Mol_0975
	c1ccccc1Cn(c(=O)[nH]c2=O)c(N)c2N(CCOC)C(=O)CSc(n3N)nnc3-c4ccc(Cl)cc4	Mol_0976
	c1cccc(c1c23)n(CCC)c2ccc(c3)NC(=O)CSc(n4N)nnc4-c5cc(OC)c(cc5)OC	Mol_0977
	c1cccc(c1c23)n(CCO)c2ccc(c3)NC(=O)CSc(n4N)nnc4-c5cc(OC)c(cc5)OC	Mol_0978
	c1ccccc1-n(c(c2c34)cccc2)c3ccc(c4)NC(=O)CSc(n5N)nnc5-c6ccc(cc6)OCC	Mol_0979
	c1cccc(c12)CCC2NC(=O)CSc(n3N)nnc3-c4ccc(cc4)S(=O)(=O)N(CC)CC	Mol_0980
	c1cccc(c12)CCCC2NC(=O)CSc(n3N)nnc3-c4ccc(cc4)OC	Mol_0981
	Cc1cc(c(cc1)OC)NC(=O)CSc(n2N)nnc2-c3cc(ccc3)OCC	Mol_0982
	COc(cc1)c(OC)cc1CNC(=O)CSc(n2N)nnc2-c3cc(ccc3)OCC	Mol_0983
	c1cccc(c12)sc(n2)NC(=O)CSc(n3N)nnc3-c4ccc(cc4)OC	Mol_0984
	COc(cc1)ccc1NC(=O)CSc(n2N)nnc2-c3cc(ccc3)OC(C)C	Mol_0985
	c1ncccc1NC(=O)CSc(n2N)nnc2-c3cc(OC)c(OC)c(c3)OC	Mol_0986
	c1cccc(c12)N(CCC2)C(=O)CSc(n3N)nnc3-c4ccc(cc4)OC	Mol_0987
	C1CCCC1NC(=O)CSc(n2N)nnc2-c3ccc(cc3)S(=O)(=O)N(CC)CC	Mol_0988
	Cc1c(C)cccc1NC(=O)CSc(n2N)nnc2-c3cc(ccc3)OC(C)C	Mol_0989
	c1cccc(Cl)c1CNC(=O)CSc(n2N)nnc2-c3cc(OC)c(OC)c(c3)OC	Mol_0990
	c1ccc(OC)cc1NC(=O)CSc(n2N)nnc2-c3cc(ccc3)OC(C)C	Mol_0991
	c1cccc(c12)[nH]cc2C(=O)C(c3ccccc3)Sc(n4N)nnc4-c(cc5C)ccc5	Mol_0992
	Cc1cc(c(cc1)OC)NC(=O)CSc(n2N)nnc2-c3cc(OC)ccc3	Mol_0993
	CC(C)(C)c1cc(ccc1)NC(=O)CSc(n2N)nnc2-c3cc(OC)ccc3	Mol_0994
	c1cccc(F)c1CNC(=O)CSc(n2N)nnc2-c3cc(OC)c(OC)c(c3)OC	Mol_0995
	CCOc(cc1)ccc1NC(=O)CSc(n2N)nnc2-c(c3C)cccc3	Mol_0996
	c1cc(Cl)ccc1CSc(n2N)nnc2-c3cc(ccc3)S(=O)(=O)N(C)C	Mol_0997
	c1cccc(c1C(F)(F)F)NC(=O)CSc(n2N)nnc2-c3ccc(Cl)cc3	Mol_0998
	C1CCCCC1NC(=O)CSc(n2N)nnc2-c3ccc(cc3)OCC	Mol_0999
	Cc1cc(no1)NC(=O)CSc(n2N)nnc2-c3cc(F)ccc3	Mol_1000
	Cc1c(C)cccc1NC(=O)CSc(n2N)nnc2-c3cc(Cl)ccc3	Mol_1001
	O=C(O)C1CCN(CC1)C(=O)CSc(n2N)nnc2-c3ccc(cc3)OC	Mol_1002
	C1CCCCC1NC(=O)CSc(n2N)nnc2-c3cc(Cl)ccc3	Mol_1003
	Cc1cc(c(cc1)OC)NC(=O)CSc(n2N)nnc2-c(cc3C)ccc3	Mol_1004
	c1cccc(c1C)Nc(nc(n2)N)nc2CSc(n3N)nnc3-c(cc4)ccc4C	Mol_1005
	O=C(O)c1ccc(cc1)N(CC(C)C)C(=O)CSc(n2N)nnc2-c(cc3)ccc3C	Mol_1006
	c1ccccc1C(=C)NC(=O)CSc(n2N)nnc2-c3c(OC)cccc3	Mol_1007
	CNC(=O)CSc(n1N)nnc1-c2cc(ccc2)S(=O)(=O)N(CC)CC	Mol_1008
	O=C(O)CSc(n1N)nnc1-c2cc(O)c(cc2)S(=O)(=O)c3ccc(Br)cc3	Mol_1009
	c1cc(F)ccc1CSc(n2N)nnc2-c3cc(ccc3)S(=O)(=O)N(C)C	Mol_1010
	c1cccc(c12)[nH]c(n2)CSc(n3N)nnc3-c4cc(OC)c(cc4)OC	Mol_1011
	COc(c1)ccc(Br)c1C(=O)CSc(n2N)nnc2-c3cc(OC)c(cc3)OC	Mol_1012
	s1ccnc1NC(=O)CSc(n2N)nnc2-c3ccc(cc3)OC	Mol_1013
	c1ccc(OC)cc1C(=O)CSc(n2N)nnc2-c3cc(OC)c(OC)c(c3)OC	Mol_1014
	Cc1cc(ccc1)OC(=O)CSc(n2N)nnc2-c3cc(OC)c(OC)c(c3)OC	Mol_1015
	FC(F)Oc(cc1)ccc1-c2nnc(n2N)Sc(c3[N+]([O-])=O)ccc(c3)[N+]([O-])=O	Mol_1016
	C1CCCC1NC(=O)CSc(n2N)nnc2-c3cc(OC)c(cc3)OC	Mol_1017
	COc1c(OC)ccc(c1)NC(=O)CSc(n2N)nnc2-c(cc3C)ccc3	Mol_1018
	Cc1cc(ccc1)NC(=O)CSc(n2N)nnc2-c3ccc(cc3)OC	Mol_1019
	c1cc(C(F)(F)F)ccc1C(=O)CSc(n2N)nnc2-c3ccc(cc3)OCC	Mol_1020
	c1cc(C)ccc1C(=O)CSc(n2N)nnc2-c3cc(OC)c(OC)c(c3)OC	Mol_1021
	c1cc(F)ccc1NC(=O)CSc(n2N)nnc2-c3cc(F)ccc3	Mol_1022
	c1cc(Cl)ccc1NC(=O)CSc(n2N)nnc2-c(c3C)cccc3	Mol_1023
	c1ccc(Cl)cc1NC(=O)CSc(n2N)nnc2-c3ccc(Cl)cc3	Mol_1024
	CC(C)OC(=O)CSc(n1N)nnc1-c2ccc(cc2)OC(F)F	Mol_1025
	Cc1onc(C)c1CSc(n2N)nnc2-c3cc(Cl)ccc3	Mol_1026
	CC(C)(C)C(=O)NNC(=O)CSc(n1N)nnc1-c2ccc(cc2)NC	Mol_1027
	Clc1cccc(Cl)c1NC(=O)CSc(n2N)nnc2-c3cc(Cl)ccc3	Mol_1028
	c1cc(Cl)ccc1C(=O)CSc(n2N)nnc2-c3cc(OC)cc(c3)OC	Mol_1029
	CC(C)(C)NC(=O)NC(=O)CSc(n1N)nnc1-c2ccc(Cl)cc2	Mol_1030
	c1cccc(Cl)c1NC(=O)CSc(n2N)nnc2-c(c3C)cccc3	Mol_1031
	c1ccccc1NC(=O)CSc(n2N)nnc2-c(c3C(C)(C)C)cccc3	Mol_1032
	CC1CCCN(C1)C(=O)CSc(n2N)nnc2-c(cc3)ccc3C	Mol_1033
	C1CCCCC1NC(=O)CSc(n2N)nnc2-c3ccc(Cl)cc3	Mol_1034
	O=C(O)CN(C)C(=O)CSc(n1N)nnc1-c2c(F)cccc2	Mol_1035
	CCCNC(=O)NC(=O)CSc(n1N)nnc1-c2ccc(F)cc2	Mol_1036
	CC(C)NC(=O)NC(=O)CSc(n1N)nnc1-c2ccc(F)cc2	Mol_1037
	COCCNC(=O)CSc(n1N)nnc1-c2ccc(Cl)cc2	Mol_1038
	CCOc(cc1)ccc1-c2nnc(n2N)SCc3cc(C)no3	Mol_1039
	COc(cc1)ccc1NC(=O)CSc(n2N)nnc2-c3cc(OC)cc(c3)OC	Mol_1040
	CCCc1ccc(cc1)NC(=O)CSc(n2N)nnc2-c(cc3)ccc3C	Mol_1041
	COc1c(OC)ccc(c1)NC(=O)CSc(n2N)nnc2-c3cc(OC)c(cc3)OC	Mol_1042
	Cc1onc(C)c1CSc(n2N)nnc2-c3ccc(Cl)cc3	Mol_1043
	c1cc(C)ccc1CSc(n2N)nnc2-c3cc(OC)c(OC)c(c3)OC	Mol_1044
	CCN(CC)S(=O)(=O)c(ccc1)cc1-c2nnc(n2N)SC	Mol_1045
	Cc1onc(C)c1CSc(n2N)nnc2-c3ccc(F)cc3	Mol_1046
	C1CCCCN1C(=O)CSc(n2N)nnc2-c3ccc(Cl)cc3	Mol_1047
	C=C(C)CSc(n1N)nnc1-c2c(Cl)cccc2	Mol_1048
	c1cc(F)ccc1CSc(n2N)nnc2-c3ccc(Cl)cc3	Mol_1049
	C=C(C)CSc(n1N)nnc1-c2cc(OC)cc(c2)OC	Mol_1050
	N#CC(C)Sc(n1N)nnc1-c(cc2)ccc2C	Mol_1051
	c1ccccc1-c2nnc(n2N)S(=O)(=O)c3ccccc3	Mol_1052
	c1ccccc1Cn(c(=O)[nH]c2=O)c(N)c2N(CC)C(=O)CSc(n3N)nnc3-c4cc(OC)c(OC)c(c4)OC	Mol_1053
	O=c1[nH]c(=O)n(CC(=O)O)c(N)c1N(CC)C(=O)CSc(n2N)nnc2-c3cc(Cl)ccc3	Mol_1054
	O1COCc(c12)cc(Cl)cc2CSc(n3N)nnc3-c4cc(ccc4)S(=O)(=O)N(C)C	Mol_1055
	c1cccc(c12)CCCC2NC(=O)CSc(n3N)nnc3-c4cc(c(cc4)OC)OCC	Mol_1056
	c1ccccc1C(C)C(=O)NNC(=O)CSc(n2N)nnc2-c3cc(ccc3)S(=O)(=O)N(CC)CC	Mol_1057
	c1cccc(c12)CCCC2NC(=O)CSc(n3N)nnc3-c4cc(OC)cc(c4)OC	Mol_1058
	c1cccc(c1c23)n(CC)c2ccc(c3)NC(=O)CSc(n4N)nnc4-c5ccc(cc5)OC	Mol_1059
	c1cccc(c1c23)n(CC)c2ccc(c3)NC(=O)CSc(n4N)nnc4-c5ccc(cc5)OC	Mol_1060
	c1cc(Cl)ccc1-c2nnc(n2N)SCc3cc(F)cc(c34)COC(O4)c5ccccc5	Mol_1061
	COC(=O)/C(=C/OC)c1c(cccc1)CSc(n2N)nnc2-c3ccc(cc3)OC	Mol_1062
	c1ccccc1CCNC(=O)NC(=O)CSc(n2N)nnc2-c3ccc(cc3)OC(F)F	Mol_1063
	c1cccc(c1C)-c2nnc(n2N)SCC(=O)Nc(cc3)ccc3-c(c4)cc(C)cc4C(=O)O	Mol_1064
	C1CCCCC1NC(=O)CSc(n2N)nnc2-c3ccc(cc3)S(=O)(=O)N(CC)CC	Mol_1065
	CCc1ccc(cc1)NC(=O)CSc(n2N)nnc2-c3cc(ccc3)OC(C)C	Mol_1066
	c1cc(C)ccc1CCN(C)C(=O)CSc(n2N)nnc2-c3cc(OC)ccc3	Mol_1067
	CCOc(cc1)ccc1-c2nnc(n2N)SCc3nnc(c(C)c3C)-c4c(OC)cccc4	Mol_1068
	COc(cc1)ccc1NC(=O)CSc(n2N)nnc2-c3cc(ccc3)OC(C)(C)C	Mol_1069
	c1cccc(c12)CCCC2NC(=O)CSc(n3N)nnc3-c4ccc(Cl)cc4	Mol_1070
	c1ccnc(Cl)c1NC(=O)CSc(n2N)nnc2-c3ccc(cc3)S(=O)(=O)c4ccc(Cl)cc4	Mol_1071
	Cc1c(C)cccc1NC(=O)CSc(n2N)nnc2-c3cc(OC(F)F)ccc3	Mol_1072
	C1CCCCC1NC(=O)CSc(n2N)nnc2-c3cc(OC)c(cc3)OC	Mol_1073
	O=c1n(C)c(=O)n(C)c(N)c1C(=O)CSc(n2N)nnc2-c3c(F)cccc3	Mol_1074
	O=C1CCCN1C(=O)CSc(n2N)nnc2-c3cc(OC)c(cc3)OC	Mol_1075
	Cc1cc(ccc1)N(C)C(=O)CSc(n2N)nnc2-c3cc(OC)c(cc3)OC	Mol_1076
	c1ccc(Cl)cc1CSc(n2N)nnc2-c3cc(ccc3)S(=O)(=O)N(C)C	Mol_1077
	c1cccc(c12)N(CCC2)C(=O)CSc(n3N)nnc3-c4ccc(Cl)cc4	Mol_1078
	c1ccc(C)c(c1C)N(C)C(=O)CSc(n2N)nnc2-c3cc(OC)c(OC)c(c3)OC	Mol_1079
	c1ccnc(Cl)c1NC(=O)CSc(n2N)nnc2-c3cc(Cl)ccc3	Mol_1080
	CCn(c(C)c1)c(N)c1C(=O)CSc(n2N)nnc2-c3c(F)cccc3	Mol_1081
	c1ccc(OC)c(c1C)NC(=O)CSc(n2N)nnc2-c3ccc(cc3)OC	Mol_1082
	[O-][N+](=O)c(c1)ccc(c1[N+]([O-])=O)Sc(n2N)nnc2-c3ccc(cc3)S(=O)(=O)c4ccc(Cl)cc4	Mol_1083
	Cc1cc(C)c(c(C)c1C)NC(=O)CSc(n2N)nnc2-c3cc(F)ccc3	Mol_1084
	s1ccnc1NC(=O)CSc(n2N)nnc2-c3ccc(cc3)OCC	Mol_1085
	C1CCCCC1N(C)C(=O)CSc(n2N)nnc2-c3cc(F)ccc3	Mol_1086
	Cc1cnc(s1)NC(=O)CSc(n2N)nnc2-c3c(Cl)cccc3	Mol_1087
	CC(C)(C)c1ccc(cc1)OC(=O)CSc(n2N)nnc2-c3cc(OCC)c(cc3)OCC	Mol_1088
	c1cccc(c12)[nH]c(n2)CSc(n3N)nnc3-c4cc(OC)c(OC)c(c4)OC	Mol_1089
	COc(c1)ccc(Br)c1C(=O)CSc(n2N)nnc2-c3cc(OC)c(OC)c(c3)OC	Mol_1090
	c1cc(C)c(C)cc1C(=O)CSc(n2N)nnc2-c3cc(OC)c(OC)c(c3)OC	Mol_1091
	Cc1cc(no1)NC(=O)CSc(n2N)nnc2-c3ccc(F)cc3	Mol_1092
	Clc1cccc(c1Cl)NC(=O)CSc(n2N)nnc2-c3ccc(Cl)cc3	Mol_1093
	COc(cc1)ccc1C(=O)CSc(n2N)nnc2-c3cc(OC)c(OC)c(c3)OC	Mol_1094
	c1cc(C)ccc1\C=C\CSc(n2N)nnc2-c3cc(OC)c(OC)c(c3)OC	Mol_1095
	COc1c(OC)ccc(c1)NC(=O)CSc(n2N)nnc2-c(cc3)ccc3C	Mol_1096
	ClCC(=O)NC(=O)NC(=O)CSc(n1N)nnc1-c2cc(Cl)ccc2	Mol_1097
	S1CCN=C1NC(=O)CSc(n2N)nnc2-c(cc3)ccc3C	Mol_1098
	c1ccccc1/C=N/n2c(SCc3nnc(n3N)SC)nnc2-c4ccccc4	Mol_1099
	Cc(c1)ccc(c1C)NC(=O)CSc(n2N)nnc2-c(c3C)cccc3	Mol_1100
	c1ccc(Cl)cc1CSc(n2N)nnc2-c3cc(OC)c(OC)c(c3)OC	Mol_1101
	c1cccc(Cl)c1-c2nnc(n2N)Sc(c3[N+]([O-])=O)ccc(c3)[N+]([O-])=O	Mol_1102
	CC(C)ONC(=O)CSc(n1N)nnc1-c2cc(OC)c(cc2)OC	Mol_1103
	Cc1cc(c(cc1)OC)NC(=O)CSc(n2N)nnc2-c(cc3)ccc3C	Mol_1104
	Cc(c1)ccc(C)c1CSc(n2N)nnc2-c3ccc(cc3)OC	Mol_1105
	CN(C)C(=O)CSc(n1N)nnc1-c2c(OC)cccc2	Mol_1106
	C=C(C)CSc(n1N)nnc1-c2cc(OC)c(N)cc2	Mol_1107
	COc(c1)c(OC)c(OC)cc1CSc(n2N)nnc2-c3ccc(cc3)OC	Mol_1108
	O=C(O)c1ccc(cc1)CSc(n2N)nnc2-c3cc(F)cc(F)c3	Mol_1109
	CC(C)(C)c1ccc(cc1)-c2nnc(n2N)SCc3c(C)noc3C	Mol_1110
	N#CC(C)Sc(n1N)nnc1-c2cc(OC)ccc2	Mol_1111
	c1cc(Cl)ccc1C(=O)NNC(=O)CSc(n2N)nnc2-c3ccc(Cl)cc3	Mol_1112
	c1ccccc1Cn(c(=O)[nH]c2=O)c(N)c2N(CC)C(=O)CSc(n3N)nnc3-c4ccc(cc4)OC(F)F	Mol_1113
	c1ccccc1/C=N/n2c(nc(c23)cccc3[N+]([O-])=O)NC(=O)CSc(n4N)nnc4-c5c(N)cccc5	Mol_1114
	c1ccccc1Cn(c(=O)[nH]c2=O)c(N)c2N(CCOC)C(=O)CSc(n3N)nnc3-c(cc4)ccc4C(C)(C)C	Mol_1115
	c1ccccc1Cn(c(=O)[nH]c2=O)c(N)c2N(CCOC)C(=O)CSc(n3N)nnc3-c(cc4)ccc4C(C)C	Mol_1116
	c1cccc(c12)C(=O)C(C2=O)Sc(n3N)nnc3-c4ccc(Cl)cc4	Mol_1117
	c1cccc(c1c23)n(CCC(C)C)c2ccc(c3)NC(=O)CSc(n4N)nnc4-c5ccc(cc5)OC	Mol_1118
	c1cc([N+]([O-])=O)cc(c12)[nH]c(n2)NC(=O)CSc(n3N)nnc3-c4c(OC)cccc4	Mol_1119
	C1COCCN1c(cc2)ccc2NC(=O)CSc(n3N)nnc3-c4cc(ccc4)OCC	Mol_1120
	c1cccc(c1c23)n(CC)c2ccc(c3)NC(=O)CSc(n4N)nnc4-c5cc(OC)c(cc5)OC	Mol_1121
	c1cccc(c12)[nH]cc2C(=O)C(c3ccccc3)Sc(n4N)nnc4-c5cc(OC)ccc5	Mol_1122
	c1cccc(c12)N(CCC2)C(=O)CSc(n3N)nnc3-c4ccc(cc4)S(=O)(=O)N(CC)CC	Mol_1123
	c1cccc(c1c23)n(CC)c2ccc(c3)NC(=O)CSc(n4N)nnc4-c5cc(OC)c(OC)c(c5)OC	Mol_1124
	c1ccccc1C(=C2C#N)C(c3ccccc3)N(C2c4cc(Cl)ccc4)C(=O)CSc(n5N)nnc5-c6ccccc6	Mol_1125
	c1cccc(c12)OCC(C)N2C(=O)CSc(n3N)nnc3-c4cc(OCC)c(cc4)OCC	Mol_1126
	c1cccc(c1C)-c2nnc(n2N)SCC(=O)N(CC)c3c(N)n(c(=O)[nH]c3=O)Cc4ccccc4	Mol_1127
	c1cc([N+]([O-])=O)cc(c12)[nH]c(n2)NC(=O)CSc(n3N)nnc3-c4c(N)cccc4	Mol_1128
	c1cccc(c12)ccc(c2OC)NC(=O)CSc(n3N)nnc3-c4cc(ccc4)OC(C)C	Mol_1129
	c1cccc(c12)CCCC2NC(=O)CSc(n3N)nnc3-c4cc(OC)c(cc4)OC	Mol_1130
	COc1cc(N)cc(c1OC)NC(=O)CSc(n2N)nnc2-c3cc(ccc3)OCC	Mol_1131
	COc(cc1)ccc1-c2nnc(n2N)SCC(=O)Nc3c(O)cc(O)c(c3)S(=O)(=O)c4ccccc4	Mol_1132
	O1CCOc(c12)ccc(c2)NC(=O)CSc(n3N)nnc3-c4cc(ccc4)OCC	Mol_1133
	C=C(C)Sc(n1N)nnc1-c(cc2)ccc2C	Mol_1134
	c1cccc(c12)NC(=O)C(C)(C)N2C(=O)CSc(n3N)nnc3-c4ccc(cc4)OC	Mol_1135
	COC(=O)/C(=C/OC)c1c(cccc1)CSc(n2N)nnc2-c(cc3)ccc3C(C)(C)C	Mol_1136
	Cc(c1)ccc(c1C)NC(=O)CSc(n2N)nnc2-c3cc(ccc3)OC(C)(C)C	Mol_1137
	C1CCC1NC(=O)CSc(n2N)nnc2-c3cc(ccc3)S(=O)(=O)N(C)C	Mol_1138
	C1CCCC1NC(=O)CSc(n2N)nnc2-c3cc(ccc3)S(=O)(=O)N(C)C	Mol_1139
	c1cccc(c12)[nH]c(n2)CSc(n3N)nnc3-c4cc(ccc4)S(=O)(=O)N(C)C	Mol_1140
	c1cccc(c12)N(CCC2)C(=O)CSc(n3N)nnc3-c4cc(OC)c(cc4)OC	Mol_1141
	c1cccc(c12)[nH]cc2C(=O)C(c3ccccc3)Sc(n4N)nnc4-c(cc5)ccc5C(C)(C)C	Mol_1142
	Cc1cc(C)cc(c1)NC(=O)NC(=O)CSc(n2N)nnc2-c3cc(OC(F)F)ccc3	Mol_1143
	Cc1cc(ccc1)NC(=O)CSc(n2N)nnc2-c3ccc(cc3)S(=O)(=O)N(CC)CC	Mol_1144
	Cc1c(OC)c(cc(n1)C)NC(=O)CSc(n2N)nnc2-c3cc(OC)ccc3	Mol_1145
	C1CCCC1NC(=O)NC(=O)CSc(n2N)nnc2-c3ccc(cc3)S(=O)(=O)c4ccc(Br)cc4	Mol_1146
	c1cccc(c12)NC(C)C(C)N2C(=O)CSc(n3N)nnc3-c4ccc(cc4)OC	Mol_1147
	Cc1cc(ccc1)NC(=O)CSc(n2N)nnc2-c3cc(OC)c(OC)c(c3)OC	Mol_1148
	c1cc(F)ccc1NC(=O)CSc(n2N)nnc2-c3ccc(cc3)S(=O)(=O)c4ccc(Br)cc4	Mol_1149
	Cc1ccc(cc1)NC(=O)NC(=O)CSc(n2N)nnc2-c3cc(F)ccc3	Mol_1150
	Cc1cc(F)c(cc1)NC(=O)CSc(n2N)nnc2-c3ccc(cc3)OC	Mol_1151
	Cc1ccc(cc1)NC(=O)NC(=O)CSc(n2N)nnc2-c3cc(Cl)ccc3	Mol_1152
	O=C(O)c1csc(n1)CSc(n2N)nnc2-c3cc(OC)c(cc3)OC	Mol_1153
	COc(cc1)ccc1NC(=O)CSc(n2N)nnc2-c3cc(Cl)ccc3	Mol_1154
	CCc1c(C)c(c(C)cc1C)NC(=O)CSc(n2N)nnc2-c(cc3C)ccc3	Mol_1155
	c1cccc(c1C(F)(F)F)NC(=O)CSc(n2N)nnc2-c3cc(F)ccc3	Mol_1156
	FC(F)Oc(cc1)ccc1-c2nnc(n2N)SCc3cn(nn3)Cc4ccccc4	Mol_1157
	c1cccc(OC(F)F)c1NC(=O)CSc(n2N)nnc2-c3ccc(cc3)OC(F)F	Mol_1158
	FC(F)Oc(cc1)ccc1-c2nnc(n2N)SCCOc3c(Cl)cc(Cl)cc3	Mol_1159
	c1cc(C)cc(c1C)NC(=O)CSc(n2N)nnc2-c3ccc(cc3)OCC	Mol_1160
	O=C(O)c1ccc(cc1)NC(=O)CSc(n2N)nnc2-c3cc(OC)c(OC)c(c3)OC	Mol_1161
	c1cc(S(F)(F)(F)F)ccc1NC(=O)CSc(n2N)nnc2-c3ccc(cc3)OC(F)F	Mol_1162
	c1cccc(c1C(F)F)NC(=O)CSc(n2N)nnc2-c3cc(F)ccc3	Mol_1163
	o1cccc1CNC(=O)CSc(n2N)nnc2-c3ccc(cc3)OC	Mol_1164
	CCN(CC)S(=O)(=O)c(ccc1)cc1-c2nnc(n2N)SCc3c(C)ccc(C)c3	Mol_1165
	Cc1cc(ccc1)NC(=O)NC(=O)CSc(n2N)nnc2-c3ccc(Cl)cc3	Mol_1166
	c1cc(Cl)ccc1C(O)(C(=O)O)CSc(n2N)nnc2-c3cc(F)ccc3	Mol_1167
	NS(=O)(=O)c(c1)ccc(Cl)c1NC(=O)CSc(n2N)nnc2-c(cc3)ccc3C	Mol_1168
	c1cc(Cl)ccc1C(=O)CSc(n2N)nnc2-c3cc(OC)c(OC)c(c3)OC	Mol_1169
	C1CCCC1NC(=O)CSc(n2N)nnc2-c3cc(OC)cc(c3)OC	Mol_1170
	COC(=O)c1c(cccc1)Sc(n2N)nnc2-c3cc(OC)c(OC)c(c3)OC	Mol_1171
	COc(cc1)ccc1NC(=O)CSc(n2N)nnc2-c(c3C)cccc3	Mol_1172
	C1COCCN1C(=O)CSc(n2N)nnc2-c3cc(Cl)ccc3	Mol_1173
	c1cc(F)ccc1C(=O)CSc(n2N)nnc2-c3cc(OC)c(OC)c(c3)OC	Mol_1174
	O=C(O)c1ccc(cc1)CSc(n2N)nnc2-c3ccc(cc3)OC(F)F	Mol_1175
	C1CCCCC1N(C)C(=O)CSc(n2N)nnc2-c3ccc(F)cc3	Mol_1176
	c1cccc(c12)[nH]c(n2)CSc(n3N)nnc3-c4cc(Cl)ccc4	Mol_1177
	C1CCC(C1=O)NC(=O)CSc(n2N)nnc2-c(cc3)ccc3C	Mol_1178
	COc1c(OC)cc(cc1OC)NC(=O)CSc(n2N)nnc2-c(cc3)ccc3C	Mol_1179
	Cc1ccc(cc1)NC(=O)CSc(n2N)nnc2-c3ccc(cc3)OC(C)C	Mol_1180
	Cc1ccc(cc1)OC(=O)CSc(n2N)nnc2-c3cc(OC)c(OC)c(c3)OC	Mol_1181
	COc1c(OC)ccc(c1)NC(=O)CSc(n2N)nnc2-c(cc(c3C)OC)cc3OC	Mol_1182
	COc(cc1)cc(OC)c1C(=O)CSc(n2N)nnc2-c3cc(OC)c(cc3)OC	Mol_1183
	C1CCCCC1N(C)C(=O)CSc(n2N)nnc2-c3ccc(Cl)cc3	Mol_1184
	Cc1cc(no1)NC(=O)CSc(n2N)nnc2-c3ccc(cc3)OC	Mol_1185
	COc(cc1)c(C)c(C)c1C(=O)CSc(n2N)nnc2-c(c3C)cccc3	Mol_1186
	c1cccc(c12)[nH]c(n2)CSc(n3N)nnc3-c4cc(F)ccc4	Mol_1187
	C1COCCN1C(=O)CSc(n2N)nnc2-c3cc(F)ccc3	Mol_1188
	C=C(C)CN(C)C(=O)CSc(n1N)nnc1-c2ccc(cc2)OC	Mol_1189
	c1cc(Cl)cc(Cl)c1NC(=O)CSc(n2N)nnc2-c3cc(Cl)ccc3	Mol_1190
	C1CC1NC(=O)CSc(n2N)nnc2-c3cc(OC)c(cc3)OC	Mol_1191
	COc1c(OC)ccc(c1)N(C(=O)C)C(=O)CSc(n2N)nnc2-c(cc3)ccc3C	Mol_1192
	Cc1c(C)ccc(c1)NC(=O)NC(=O)CSc(n2N)nnc2-c(cc3)ccc3C	Mol_1193
	Cc1c(C)ccc(c1)NC(=O)CSc(n2N)nnc2-c(cc3)ccc3C(C)C	Mol_1194
	c1ccccc1Cn(c(=O)[nH]c2=O)c(N)c2N(CCOC)C(=O)CSc(n3N)nnc3-c4cc(Cl)ccc4	Mol_1195
	c1ccccc1Cn(c(=O)[nH]c2=O)c(N)c2N(CCOC)C(=O)CSc(n3N)nnc3-c4cc(OC)c(cc4)OC	Mol_1196
	Cc1onc(C)c1CSc(n2N)nnc2-c3ccc(cc3)OC	Mol_1197
	O=C(O)c1ccc(cc1)CSc(n2N)nnc2-c3cc(Cl)c(Cl)cc3	Mol_1198
	CC(C)OC(=O)CSc(n1N)nnc1-c2c(Cl)cccc2	Mol_1199
	c1cc(F)ccc1CSc(n2N)nnc2-c3cc(OC)c(OC)c(c3)OC	Mol_1200
	o1nc(C)cc1CSc(n2N)nnc2-c3ccc(cc3)OC	Mol_1201
	Cc(c1)nc(C)c(C)c1CSc(n2N)nnc2-c3ccc(cc3)OC	Mol_1202
	CC(C)OC(=O)CSc(n1N)nnc1-c2cc(Cl)c(Cl)cc2	Mol_1203
	O=C(O)c1ccc(cc1)CSc(n2N)nnc2-c3c(Cl)cccc3	Mol_1204
	Cc(c1)ccc(C)c1CSc(n2N)nnc2-c3cc(OC)c(cc3)OC	Mol_1205
	Nc(n1)nc(N)cc1CSc(n2N)nnc2-c3ccc(cc3)OC	Mol_1206
	c1ccccc1C(=O)CSc(n2N)nnc2-c3c(Cl)cc(Cl)cc3	Mol_1207
	C1COCCN1C(=O)CSc(n2N)nnc2-c3ccc(Cl)cc3	Mol_1208
	O=C(O)c1ccc(cc1)CSc(n2N)nnc2-c3c(F)cccc3	Mol_1209
	CC(C)Oc(cc1)ccc1-c2nnc(n2N)SCc3cc(F)cc(c34)COC(O4)c5ccccc5	Mol_1210
	ClC(Cl)(Cl)c1ccc(cc1)CSc(n2N)nnc2-c3ccc(Cl)cc3	Mol_1211
	C=C(C)CSc(n1N)nnc1-c2cc(OC)c(OC)c(c2)OC	Mol_1212
	C=C(C)CSc(n1N)nnc1-c(cc2)cc(Cl)c2C	Mol_1213
	c1cccc(c12)CCCC2NC(=O)CSc(n3N)nnc3-c4cc(OC)c(OC)c(c4)OC	Mol_1214
	c1cc([N+]([O-])=O)cc(c12)[nH]c(n2)NC(=O)CSc(n3N)nnc3-c4c(F)cccc4	Mol_1215
	COc(cc1)ccc1C(=O)C(CSc(c23)cccc2)N3C(=O)CSc(n4N)nnc4-c5ccc(cc5)OC	Mol_1216
	c1ccccc1Cn(c(=O)[nH]c2=O)c(N)c2C(C)Sc(n3N)nnc3-c4ccc(cc4)OC(F)F	Mol_1217
	CCN(CC)S(=O)(=O)c(ccc1)cc1-c2nnc(n2N)SCc(n3)[nH]c(c34)cccc4	Mol_1218
	C1CCCC1NC(=O)CSc(n2N)nnc2-c3cc(ccc3)S(=O)(=O)N(CC)CC	Mol_1219
	c1cccc(c12)cccc2CCNC(=O)CSc(n3N)nnc3-c4cc(OC)c(OC)c(c4)OC	Mol_1220
	CC(=O)Sc(n1N)nnc1-c2ccc(cc2)OC	Mol_1221
	c1cccc(c1C(F)(F)F)CNC(=O)CSc(n2N)nnc2-c3cc(OC)c(OC)c(c3)OC	Mol_1222
	COc(cc1)ccc1NC(=O)NC(=O)CSc(n2N)nnc2-c3cc(ccc3)OC(C)C	Mol_1223
	c1cccc(N)c1NC(=O)c2ccc(cc2)CSc(n3N)nnc3-c4cc(OC)cc(c4)OC	Mol_1224
	O=c1[nH]c(=O)n(CC(C)C)c(N)c1N(C)C(=O)CSc(n2N)nnc2-c(cc3)ccc3C(C)C	Mol_1225
	C1CCCCC1NC(=O)CSc(n2N)nnc2-c3cc(ccc3)S(=O)(=O)N(C)C	Mol_1226
	c1cccc(c12)[nH]cc2C(=O)C(c3ccccc3)Sc(n4N)nnc4-c5ccc(cc5)OC	Mol_1227
	c1ccccc1C(C)Sc(n2N)nnc2-c3c(F)cccc3	Mol_1228
	c1ccc(C)cc1CCNC(=O)CSc(n2N)nnc2-c3cc(OCC)c(OCC)c(c3)OCC	Mol_1229
	FC(F)Oc(cc1)ccc1-c2nnc(n2N)SCC(=O)NC(=O)NC(=O)NCCc3ccccc3	Mol_1230
	c1ccc(OC)cc1NC(=O)CSc(n2N)nnc2-c3cc(OC)c(OC)c(c3)OC	Mol_1231
	CCOc(cc1)ccc1NC(=O)CSc(n2N)nnc2-c3cc(OC)c(cc3)OC	Mol_1232
	CCOc(c(cc1)OC)cc1CNC(=O)CSc(n2N)nnc2-c3cc(OC)c(OC)c(c3)OC	Mol_1233
	c1cccc(Cl)c1Cn(cc2)c(=O)cc2CSc(n3N)nnc3-c4ccc(Cl)cc4	Mol_1234
	C1COCCN1C(=O)CSc(n2N)nnc2-c3ccc(cc3)S(=O)(=O)N(CC)CC	Mol_1235
	COc1c(OC)ccc(c1)NC(=O)CSc(n2N)nnc2-c3ccc(cc3)OCC	Mol_1236
	C1CCCCC1N(CC)C(=O)CSc(n2N)nnc2-c3cc(F)ccc3	Mol_1237
	O=c1n(C)n(CC)c(N)c1C(=O)CSc(n2N)nnc2-c3c(F)cccc3	Mol_1238
	CC(C)NC(=O)CSc(n1N)nnc1-c2cc(ccc2)S(=O)(=O)N(CC)CC	Mol_1239
	COc1c(OC)ccc(c1)NC(=O)CSc(n2N)nnc2-c3cc(F)ccc3	Mol_1240
	Cc1c(C)csc1NC(=O)CSc(n2N)nnc2-c3cc(F)ccc3	Mol_1241
	Clc1ccc(nc1)NC(=O)CSc(n2N)nnc2-c3c(OC)cccc3	Mol_1242
	c1ccc(OC)cc1NC(=O)CSc(n2N)nnc2-c3cc(OC)c(OC)c(c3)OC	Mol_1243
	c1ccccc1Cn(c(=O)[nH]c2=O)c(N)c2N(CCOC)C(=O)CSc(n3N)nnc3-c4cc(F)ccc4	Mol_1244
	c1ccccc1Cn(c(=O)[nH]c2=O)c(N)c2N(CCOC)C(=O)CSc(n3N)nnc3-c4cc(OC)c(OC)c(c4)OC	Mol_1245
	FC(F)(F)C(=O)NN(C)C(=O)CSc(n1N)nnc1-c2c(F)cccc2	Mol_1246
	Cc1ccc(cc1)OCCSc(n2N)nnc2-c3c(O)c(OC)ccc3	Mol_1247
	COc1c(OC)ccc(c1)NC(=O)CSc(n2N)nnc2-c3cc(OC)c(OC)c(c3)OC	Mol_1248
	COc(cc1)cc(OC)c1NC(=O)CSc(n2N)nnc2-c3ccc(cc3)OC	Mol_1249
	Cc1ccc(cc1)NC(=O)CSc(n2N)nnc2-c3cc(OC)c(OC)c(c3)OC	Mol_1250
	C1CCCCC1N(C)C(=O)CSc(n2N)nnc2-c(cc3)ccc3C(C)(C)C	Mol_1251
	COc(cc1)ccc1NC(=O)CSc(n2N)nnc2-c3cc(OC)c(cc3)OC	Mol_1252
	COc1c(OC)ccc(c1)NC(=O)CSc(n2N)nnc2-c3ccc(cc3)OC	Mol_1253
	C1CCCC(C1C)NC(=O)CSc(n2N)nnc2-c3ccc(F)cc3	Mol_1254
	C1COCCN1C(=O)CSc(n2N)nnc2-c3cc(OC)c(cc3)OC	Mol_1255
	Cc1csc(n1)NC(=O)CSc(n2N)nnc2-c3ccc(Cl)cc3	Mol_1256
	COc(c(=O)c1)c(OC)c(OC)cc1CSc(n2N)nnc2-c3ccc(cc3)OC	Mol_1257
	C1CCCC1NC(=O)NC(=O)CSc(n2N)nnc2-c3ccc(Cl)cc3	Mol_1258
	Cc1cc(c(cc1)OC)NC(=O)CSc(n2N)nnc2-c3cc(OC)c(cc3)OC	Mol_1259
	COc(cc1)cc(OC)c1C(=O)CSc(n2N)nnc2-c3cc(OC)c(OC)c(c3)OC	Mol_1260
	c1cc(C)cc(C)c1C(=O)CSc(n2N)nnc2-c3cc(OC)c(OC)c(c3)OC	Mol_1261
	Cc1cc(c(cc1)OC)NC(=O)CSc(n2N)nnc2-c3cc(OC)c(cc3)OC	Mol_1262
	CC(=O)Nc(cc1)ccc1NC(=O)CSc(n2N)nnc2-c3cc(OC)c(OC)c(c3)OC	Mol_1263
	COc(cc1)ccc1NC(=O)CSc(n2N)nnc2-c(cc3)ccc3C(C)C	Mol_1264
	c1cc(C)ccc1CNC(=O)CSc(n2N)nnc2-c3cc(OC)c(cc3)OC	Mol_1265
	c1cc(C)ccc1CCNC(=O)CSc(n2N)nnc2-c3ccc(cc3)OC	Mol_1266
	ClCC(=O)N(C)C(=O)CSc(n1N)nnc1-c2ccc(cc2)OC(F)F	Mol_1267
	c1cc(Cl)ccc1-c(n2N)nnc2CSc(n3N)nnc3Nc(c4C)cccc4	Mol_1268
	COc1c(OC)ccc(c1)NC(=O)CSc(n2N)nnc2-c3cc(OC)cc(c3)OC	Mol_1269
	c1cc(Cl)ccc1\C=C\CSc(n2N)nnc2-c3cc(OC)c(OC)c(c3)OC	Mol_1270
	O=C1CCCN1C(=O)CSc(n2N)nnc2-c3cc(OC)cc(c3)OC	Mol_1271
	o1cccc1CNC(=O)CSc(n2N)nnc2-c3ccc(F)cc3	Mol_1272
	c1ccccc1C(C)NC(=O)CSc(n2N)nnc2-c3c(OC)cccc3	Mol_1273
	o1cccc1CNC(=O)CSc(n2N)nnc2-c(c3C)cccc3	Mol_1274
	COCCN(C(=O)C)C(=O)CSc(n1N)nnc1-c2ccc(Cl)cc2	Mol_1275
	O=S1(=O)CC(CC1)NC(=O)CSc(n2N)nnc2-c(cc3)ccc3C	Mol_1276
	c1ccccc1C(=O)NNC(=O)CSc(n2N)nnc2-c3c(OC)cccc3	Mol_1277
	COc1c(OC)ccc(c1)NC(=O)CSc(n2N)nnc2-c3ccc(cc3)OC	Mol_1278
	c1cc(Cl)ccc1NC(=O)CSc(n2N)nnc2-c3cc(F)ccc3	Mol_1279
	Clc1cccc(c1Cl)NC(=O)CSc(n2N)nnc2-c3ccc(F)cc3	Mol_1280
	c1c(Cl)c(Cl)cc(Cl)c1NC(=O)CSc(n2N)nnc2-c(cc3)ccc3C(C)(C)C	Mol_1281
	COc(cc1)ccc1NC(=O)CSc(n2N)nnc2-c(cc3C)cc(c3)OC	Mol_1282
	CC(=O)Oc(cc1)c(OC)cc1CSc(n2N)nnc2-c(cc3)ccc3C	Mol_1283
	COc1c(OC)ccc(c1)NC(=O)CSc(n2N)nnc2-c3cc(OC)c(OC)c(c3)OC	Mol_1284
	Clc1cccc(c1Cl)NC(=O)CSc(n2N)nnc2-c3cc(Cl)ccc3	Mol_1285
	COc(cc1)ccc1NC(=O)CSc(n2N)nnc2-c(cc3)ccc3C(C)(C)C	Mol_1286
	Cc1csc(n1)NC(=O)CSc(n2N)nnc2-c(cc3)ccc3C(C)(C)C	Mol_1287
	COc(c1)cc(OC)cc1NC(=O)CSc(n2N)nnc2-c3cc(OC)c(cc3)OC	Mol_1288
	o1cccc1CNC(=O)CSc(n2N)nnc2-c3ccc(Cl)cc3	Mol_1289
	COc(c1)cc(cc1C)NC(=O)CSc(n2N)nnc2-c3ccc(cc3)OC	Mol_1290
	CCCCn(c(=O)n(C)c1=O)c(N)c1N(CCOC)C(=O)CSc(n2N)nnc2-c3ccc(F)cc3	Mol_1291
	c1ccccc1C(n2cccc2)Sc(n3N)nnc3-c4ccc(cc4)OC(F)F	Mol_1292
	CC(C)OC(=O)CSc(n1N)nnc1-c2cc(OC)c(OC)c(c2)OC	Mol_1293
	c1cc(Cl)cc(Cl)c1NC(=O)CSc(n2N)nnc2-c3ccc(Cl)cc3	Mol_1294
	CC(C)OC(=O)CSc(n1N)nnc1-c2cc(OC)c(OC)c(c2)OC	Mol_1295
	Cc(c1)ccc(Cl)c1CSc(n2N)nnc2-c3ccc(cc3)OC	Mol_1296
	CCN(CC)C(=O)CSc(n1N)nnc1-c2cc(OC)c(OC)c(c2)OC	Mol_1297
	c1c(F)c(Cl)cc(Cl)c1CSc(n2N)nnc2-c3cc(Cl)ccc3	Mol_1298
	COc1c(OC)cc(cc1OC)NC(=O)CSc(n2N)nnc2-c3cc(OC)c(OC)c(c3)OC	Mol_1299
	c1cc(F)ccc1NC(=O)CSc(n2N)nnc2-c3ccc(Cl)cc3	Mol_1300
	o1nc(N)cc1CSc(n2N)nnc2-c3ccc(cc3)OC	Mol_1301
	c1c(Cl)ccc(Cl)c1NC(=O)CSc(n2N)nnc2-c3ccc(Cl)cc3	Mol_1302
	c1cc(Cl)ccc1NC(=O)CSc(n2N)nnc2-c3ccc(F)cc3	Mol_1303
	CC(C)OC(=O)CSc(n1N)nnc1-c2c(OC)cccc2	Mol_1304
	o1cccc1C(C(=O)O)Sc(n2N)nnc2-c3ccc(Cl)cc3	Mol_1305
	CN(C)S(=O)(=O)c(ccc1)cc1-c2nnc(n2N)SCc(c3C)nc(N)nc3Nc4ccccc4	Mol_1306
	c1ccccc1/C=N/n2c(-c3c(OC)cccc3)nnc2CSc(n4N)nnc4-c5ccc(cc5)OCC	Mol_1307
	c1c(Cl)cc(F)cc1CSc(n2N)nnc2-c3ccc(Cl)cc3	Mol_1308
	O=C1CCCN1C(=O)CSc(n2N)nnc2-c3cc(ccc3)S(=O)(=O)N(CC)CC	Mol_1309
	c1ccccc1Cn(c(=O)[nH]c2=O)c(N)c2N(C)C(=O)CSc(n3N)nnc3-c4c(Cl)cccc4	Mol_1310
	C1CCCCC1NC(=O)CSc(n2N)nnc2-c3cc(ccc3)S(=O)(=O)N(CC)CC	Mol_1311
	COC(=O)/C(=C/OC)c1c(cccc1)CSc(n2N)nnc2-c3cc(OC)c(OC)c(c3)OC	Mol_1312
	O1CCOc(c12)ccc(c2)NC(=O)CSc(n3N)nnc3-c4cc(OC)ccc4	Mol_1313
	Cc1ccc(cc1)OCCSc(n2N)nnc2-c3cc(c(cc3)OC)OCC4CCOC4	Mol_1314
	C1CCCCCC1NC(=O)CSc(n2N)nnc2-c3cc(ccc3)S(=O)(=O)N(CC)CC	Mol_1315
	CCCc1cc(ccc1)NC(=O)CSc(n2N)nnc2-c3cc(ccc3)OC(C)C	Mol_1316
	C1CCCCCCC1NC(=O)CSc(n2N)nnc2-c3cc(ccc3)S(=O)(=O)N(CC)CC	Mol_1317
	O=c1n(C)c(=O)n(CC(C)C)c(N)c1C(=O)CSc(n2N)nnc2-c3c(F)cccc3	Mol_1318
	c1ccc(C)c(c1C)NC(=O)CSc(n2N)nnc2-c3cc(ccc3)S(=O)(=O)N(CC)CC	Mol_1319
	n1oc(C)cc1CNC(=O)CSc(n2N)nnc2-c3cc(F)ccc3	Mol_1320
	Cc1ccc(cc1)NC(=O)CSc(n2N)nnc2-c3cc(OCC)c(OC)c(c3)OC	Mol_1321
	O1CCCC1NC(=O)CSc(n2N)nnc2-c3cc(Cl)ccc3	Mol_1322
	C1CCCCC1NC(=O)NC(=O)CSc(n2N)nnc2-c3cc(Cl)ccc3	Mol_1323
	CCOc(cc1)ccc1NC(=O)CSc(n2N)nnc2-c3cc(OC)c(OC)c(c3)OC	Mol_1324
	c1ccc(OC)cc1CNC(=O)CSc(n2N)nnc2-c3cc(OC)c(OC)c(c3)OC	Mol_1325
	Cc1cc(F)c(cc1)NC(=O)CSc(n2N)nnc2-c3cc(OC)c(OC)c(c3)OC	Mol_1326
	c1cccc(c12)N(CCC2)C(=O)CSc(n3N)nnc3-c4cc(Cl)ccc4	Mol_1327
	O1CCCC1CNC(=O)CSc(n2N)nnc2-c(cc3)ccc3C(C)(C)C	Mol_1328
	c1ccc(Cl)cc1NC(=O)CSc(n2N)nnc2-c3cc(OC)c(OC)c(c3)OC	Mol_1329
	CCN(CC)S(=O)(=O)c(ccc1)cc1-c2nnc(n2N)SCc3c(C)noc3C	Mol_1330
	Cc1cc(ccc1)NC(=O)CSc(n2N)nnc2-c3ccc(cc3)OC(F)F	Mol_1331
	c1ccccc1C(=C(S2)C(=O)C)Nn(c23)c(nn3)-c4ccccc4	Mol_1332
	CC(C)(C)c(cc1)cc(c12)n(C)c(n2)NC(=O)CSc(n3N)nnc3-c(cc4)ccc4C	Mol_1333
	CC(C)C(C)CNC(=O)NC(=O)CSc(n1N)nnc1-c2cc(F)ccc2	Mol_1334
	O=c1[nH]c(=O)n(CC)c(N)c1C(=O)CSc(n2N)nnc2-c3c(F)cccc3	Mol_1335
	c1ccccc1CSc(n2S(=O)(=O)c3ccccc3)nnc2-c4ccccc4	Mol_1336
	c1cc(S(=O)(=O)N)ccc1NC(=O)CSc(n2N)nnc2-c3cc(OC)c(OC)c(c3)OC	Mol_1337
	NC(=O)CSc(n1N)nnc1-c(c2C)ccc(C)c2	Mol_1338
	c1ccc(OC)cc1CNC(=O)CSc(n2N)nnc2-c3cc(OC)c(cc3)OC	Mol_1339
	c1ccc(Cl)cc1CN(C)C(=O)CSc(n2N)nnc2-c(cc3)ccc3C(C)(C)C	Mol_1340
	c1cccc(c12)[nH]cc2C(=O)C3C(c4ccccc4)CN(CC3)C(=O)CSc(n5N)nnc5-c(cc6)ccc6C	Mol_1341
	C1CCCC(C1C)NC(=O)CSc(n2N)nnc2-c(cc3)ccc3C(C)(C)C	Mol_1342
	CCc(cc1)cc(C)c1C(=O)CSc(n2N)nnc2-c3ccc(cc3)OC	Mol_1343
	COc(cc1)ccc1NC(=O)CSc(n2N)nnc2-c3cc(OC)c(OC)c(c3)OC	Mol_1344
	c1ccccc1CCNC(=O)CSc(n2N)nnc2-c3c(OC)cccc3	Mol_1345
	COc(c1)ccc(OC)c1NC(=O)CSc(n2N)nnc2-c3cc(OC)c(cc3)OC	Mol_1346
	c1ccccc1-c2nnc(SCC([O-])=O)n2CCOc(c3C)cc(cc3)OC	Mol_1347
	O1CCOc(c12)ccc(c2)NC(=O)CSc(n3N)nnc3-c(cc4)ccc4C	Mol_1348
	Cc1cc(no1)NC(=O)CSc(n2N)nnc2-c3cc(OC)c(cc3)OC	Mol_1349
	c1cc(C)ccc1CNC(=O)CSc(n2N)nnc2-c3cc(OC)c(OC)c(c3)OC	Mol_1350
	c1cc(F)c(F)cc1C(=O)CSc(n2N)nnc2-c3cc(OC)c(OC)c(c3)OC	Mol_1351
	c1cc(C(F)(F)F)ccc1C(=O)CSc(n2N)nnc2-c(cc3)ccc3C(=O)N(CC)CC	Mol_1352
	COc(cc1)c(OC)cc1CNC(=O)CSc(n2N)nnc2-c3cc(OC)c(OC)c(c3)OC	Mol_1353
	Cc1c(C)ccc(c1)NC(=O)CSc(n2N)nnc2-c3cc(OC)c(OC)c(c3)OC	Mol_1354
	c1cccc(OC)c1NC(=O)CSc(n2N)nnc2-c3ccccn3	Mol_1355
	N#CC(C)Sc(n1N)nnc1-c2cc(ccc2)S(=O)(=O)N(CC)CC	Mol_1356
	COc1c(OC)ccc(c1)NC(=O)CSc(n2N)nnc2-c(c3C)cccc3	Mol_1357
	Cc1ccc(cc1)N(C)C(=O)CSc(n2N)nnc2-c3cc(OC)c(OC)c(c3)OC	Mol_1358
	Cc1cc(ccc1)OCCSc(n2N)nnc2-c3c(OC)ccc(c3)OC	Mol_1359
	C1CCCC1NC(=O)CSc(n2N)nnc2-c3c(OC)cccc3	Mol_1360
	C1CCCC1NC(=O)CSc(n2N)nnc2-c3cc(OC)c(OC)c(c3)OC	Mol_1361
	Clc1cccc(F)c1CSc(n2N)nnc2-c3cc(OC)c(OC)c(c3)OC	Mol_1362
	c1cccc(N)c1NC(=O)CSc(n2N)nnc2-c3c(OCC)cccc3	Mol_1363
	c1c(Cl)c(Cl)cc(Cl)c1NC(=O)CSc(n2N)nnc2-c3cc(F)ccc3	Mol_1364
	c1cc(C(F)F)ccc1C(=O)CSc(n2N)nnc2-c3cc(OC)c(OC)c(c3)OC	Mol_1365
	O=S1(=O)CC(CC1)N(C)C(=O)CSc(n2N)nnc2-c(cc3)ccc3C	Mol_1366
	CC(C)(C)c1ccc(cc1)-c2nnc(n2N)SC(C)C	Mol_1367
	c1ccc(Cl)cc1CCN(c2ccccc2)C(=O)CSc(n3N)nnc3-c4cc(OC)c(OC)c(c4)OC	Mol_1368
	CNC(=O)NC(=O)CSc(n1N)nnc1-c2c(OC)cccc2OC	Mol_1369
	FC(F)Oc(cc1)ccc1CSc(n2N)nnc2-c3cc(F)ccc3	Mol_1370
	c1cccc(OCC)c1-n2c(SCC(=O)NC)nnc2-c3ccccc3	Mol_1371
	Cc(c1)n(N)c(C)c1C(=O)CSc(n2N)nnc2-c3c(F)cccc3	Mol_1372
	COc(c1)cc(OC)cc1C(=O)CSc(n2N)nnc2-c3cc(OC)c(OC)c(c3)OC	Mol_1373
	c1ccccc1C(=O)NNC(=O)CSc(n2N)nnc2-c3c(Cl)cccc3	Mol_1374
	COc(cc1)ccc1OCCSc(n2N)nnc2-c(c(cc3)OC)cc3C	Mol_1375
	Cc1ccc(cc1)NC(=O)CSc(n2N)nnc2-c3c(Cl)cccc3	Mol_1376
	Cc1ncc([N+]([O-])=O)n1C2CC(SC2)c3c(O)cccc3	Mol_1377
	Cc1ccc(cc1)NC(=O)CSc(n2N)nnc2-c3c(F)cccc3	Mol_1378
	CC(C)NC(=O)CSc(n1N)nnc1-c2cc(OC)c(OC)c(c2)OC	Mol_1379
	FC(F)Oc(cc1)ccc1NC(=O)CSc(n2N)nnc2-c3ccc(cc3)OC(F)F	Mol_1380
	c1c(F)ccc(F)c1CSc(n2N)nnc2-c3cc(OC)c(OC)c(c3)OC	Mol_1381
	c1ccc(C)c(c1C)NC(=O)CSc(n2N)nnc2-c3c(F)cccc3	Mol_1382
	Cc1onc(C)c1CSc(n2N)nnc2-c3cc(OC)c(cc3)OC	Mol_1383
	c1cccc(c12)[nH]cc2C(=O)C(c3ccccc3)Sc(n4N)nnc4-c5cc(OC)c(cc5)OC	Mol_1384
	c1ccccc1Cn(c(=O)[nH]c2=O)c(N)c2N(C)C(=O)CSc(n3N)nnc3-c4c(F)cccc4	Mol_1385
	O=C(O)C1CCN(CC1)C(=O)CSc(n2N)nnc2-c3cc(ccc3)S(=O)(=O)N(CC)CC	Mol_1386
	c1cccc(c12)CCCC2NC(=O)NC(=O)CSc(n3N)nnc3-c4ccc(Cl)cc4	Mol_1387
	c1ccccc1C(c2ccccc2)OC3CCN(CC3)C(=O)CSc(n4N)nnc4-c5ccc(cc5)OC(F)F	Mol_1388
	c1cccc(c12)[nH]cc2C(=O)C(c3ccccc3)Sc(n4N)nnc4-c5cc(OC)c(OC)c(c5)OC	Mol_1389
	c1cc(C)c(C)cc1C(O)(C(=O)O)CSc(n2N)nnc2-c3cc(ccc3)S(=O)(=O)N(CC)CC	Mol_1390
	n1ccccc1NC(=O)CSc(n2N)nnc2-c3ccc(cc3)Sc(n4)[nH]c(c45)cccc5	Mol_1391
	c1cccc(F)c1C(O)(Cn2cncn2)CSc(n3N)nnc3-c4ccc(cc4)Oc5ccccc5	Mol_1392
	c1ccccc1Cn(c(=O)[nH]c2=O)c(N)c2N(CCOC)C(=O)CSc(n3N)nnc3-c4ccc(cc4)OC(F)F	Mol_1393
	c1cc(S(=O)(=O)Cl)ccc1Sc(n2N)nnc2-c3ccc(cc3)S(=O)(=O)c4ccc(Br)cc4	Mol_1394
	c1ccc(Cl)cc1-c2nnc(n2N)Sc3ccc(S(=O)(=O)Cl)cc3	Mol_1395
	[O-][N+](=O)c1cnc(N)c(c12)n(N)c(n2)Sc3ccccc3	Mol_1396
	Cc(c1)ccc(c1C)NC(=O)NC(=O)CSc(n2N)nnc2-c3cc(F)ccc3	Mol_1397
	c1cccc(c1C(F)(F)F)NC(=O)CSc(n2N)nnc2-c3ccc(cc3)OC(F)F	Mol_1398
	Cc1cc(c(cc1)OC)NC(=O)CSc(n2N)nnc2-c3cc(Cl)ccc3	Mol_1399
	FC(F)Oc(cc1)ccc1-c2nnc(n2N)SCc3nc(OC)cc(c34)cccc4	Mol_1400
	Cc(c1)ccc(c1C)NC(=O)NC(=O)CSc(n2N)nnc2-c3cc(Cl)ccc3	Mol_1401
	COc(c1)ccc(OC)c1CNC(=O)CSc(n2N)nnc2-c(cc3C)ccc3	Mol_1402
	Cc1cc(C)cc(c1)NC(=O)CSc(n2N)nnc2-c3cc(ccc3)S(=O)(=O)N(CC)CC	Mol_1403
	c1c(Cl)c(Cl)cc(Cl)c1NC(=O)CSc(n2N)nnc2-c3cc(OC(F)F)ccc3	Mol_1404
	c1ccc(C)cc1CN(C)C(=O)CSc(n2N)nnc2-c3cc(OC)c(OC)c(c3)OC	Mol_1405
	Cc1cc(ccc1)NC(=O)CSc(n2N)nnc2-c3cc(OC(C)C)c(O)c(c3)OC(C)C	Mol_1406
	c1ccc(OC)cc1NC(=O)CSc(n2N)nnc2-c3ccc(cc3)OC(C)C	Mol_1407
	CC(C)c1cc(ccc1)NC(=O)CSc(n2N)nnc2-c3cc(OC)c(OC)c(c3)OC	Mol_1408
	c1cc(Cl)ccc1-c2nnc(n2N)Sc3ccc(S(=O)(=O)Cl)cc3	Mol_1409
	O=C(O)C(C)Sc(n1N)nnc1-c2c(F)cccc2	Mol_1410
	COc(cc1)ccc1CNC(=O)CSc(n2N)nnc2-c3cc(OC)c(OC)c(c3)OC	Mol_1411
	C1CCCCCC1NC(=O)CSc(n2N)nnc2-c3cc(OC)c(OC)c(c3)OC	Mol_1412
	CCC(C)NC(=O)NC(=O)CSc(n1N)nnc1-c2c(Cl)cccc2	Mol_1413
	C1CCCCC1NC(=O)CSc(n2N)nnc2-c3cc(OC)c(OC)c(c3)OC	Mol_1414
	Cc1cc(c(cc1)OC)NC(=O)CSc(n2N)nnc2-c3ccc(cc3)OC	Mol_1415
	c1cc(C(F)(F)F)ccc1C(=O)CSc(n2N)nnc2-c3cc(OC)c(OC)c(c3)OC	Mol_1416
	FC(F)Oc(cc1)ccc1-c2nnc(n2N)SCc(n3)[nH]c(c34)cccc4	Mol_1417
	C1CCCC1NC(=O)CSc(n2N)nnc2-c3ccc(cc3)OC(F)F	Mol_1418
	C1CCCCC1NC(=O)CSc(n2N)nnc2-c3c(OC)cccc3	Mol_1419
	c1cc(F)ccc1NC(=O)CSc(n2N)nnc2-c3cc(OC)c(OC)c(c3)OC	Mol_1420
	Cc1cc(c(cc1)OC)NC(=O)CSc(n2N)nnc2-c3cc(OC)cc(c3)OC	Mol_1421
	COc(c1)cc(OC)c(c1C)NC(=O)CSc(n2N)nnc2-c3ccc(cc3)OC	Mol_1422
	Cc(c1)ccc(c12)[nH]c(n2)CSc(n3N)nnc3-c4cc(Cl)ccc4	Mol_1423
	COc(c1)ccc(c1C)NC(=O)CSc(n2N)nnc2-c(c3C)cccc3	Mol_1424
	c1cccc(N)c1NC(=O)CSc(n2N)nnc2-c3cc(F)c(Cl)cc3	Mol_1425
	c1cc(F)c(C)cc1C(=O)CSc(n2N)nnc2-c3cc(OC)c(OC)c(c3)OC	Mol_1426
	COc(cc1)cc(OC)c1NC(=O)CSc(n2N)nnc2-c3cc(OC)c(cc3)OC	Mol_1427
	c1cc(F)cc(F)c1C(=O)CSc(n2N)nnc2-c3cc(OC)c(OC)c(c3)OC	Mol_1428
	c1cccc(c1C)N(CC(=O)O)C(=O)CSc(n2N)nnc2-c3c(F)cccc3	Mol_1429
	c1ccccc1NC(=O)CSc(n2N)nnc2-c3cc(co3)S(=O)(=O)c4ccccc4	Mol_1430
	c1c(F)ccc(F)c1C(=O)CSc(n2N)nnc2-c3cc(OC)c(OC)c(c3)OC	Mol_1431
	O1CCN(C1=O)C(=O)CSc(n2N)nnc2-c3cc(OC)c(cc3)OC	Mol_1432
	c1cccc(c12)[nH]c(n2)NC(=O)CSc(n3N)nnc3-c(c4C)cccc4	Mol_1433
	CC(C)(C)Oc(cc1)ccc1C(=O)CSc(n2N)nnc2-c3cc(OC)c(cc3)OC	Mol_1434
	CC1CC(CC1)NC(=O)CSc(n2N)nnc2-c(cc3)ccc3C(C)(C)C	Mol_1435
	Cc1cc(c(cc1)OC)NC(=O)CSc(n2N)nnc2-c3cc(OC)c(OC)c(c3)OC	Mol_1436
	CCC1CCCCN1C(=O)CSc(n2N)nnc2-c3ccc(F)cc3	Mol_1437
	c1cccc(c12)[nH]cc2C(=O)C(C(=O)O)Sc(n3N)nnc3-c(cc4)ccc4C	Mol_1438
	CC(C)(C)c1ccc(cc1)OC(=O)CSc(n2N)nnc2-c3cc(OC)c(OC)c(c3)OC	Mol_1439
	Fc1c(Cl)cc(cc1)NC(=O)CSc(n2N)nnc2-c3cc(Cl)ccc3	Mol_1440
	Cc1cc(c(cc1)OC)NC(=O)CSc(n2N)nnc2-c3ccc(cc3)OC	Mol_1441
	c1ccccc1-c2nc(-c3ccc(F)cc3)n(n2)CCSc(n4-c5c(OCC)cccc5)nnc4-c6cc(OC)c(OC)c(c6)OC	Mol_1442
	c1cccc(c12)CCC2NC(=O)CSc(n3N)nnc3-c4cc(ccc4)S(=O)(=O)N(CC)CC	Mol_1443
	CCCCn(c(=O)[nH]c1=O)c(N)c1N(CCOC)C(=O)CSc(n2N)nnc2-c(cc3)ccc3C	Mol_1444
	FC(F)Oc(cc1)ccc1-c2nnc(n2N)SCc3cc(F)cc(c34)COC(O4)c5ccccc5	Mol_1445
	c1c(F)c([N+]([O-])=O)cc(c12)[nH]c(n2)NC(=O)CSc(n3N)nnc3-c4c(N)cccc4	Mol_1446
	O1CCCC1CNC(=O)C(=O)N(CC(=O)O)CCS(=O)(=O)CCn2c([N+]([O-])=O)cnc2C	Mol_1447
	c1ccccc1-c2nnc(n2N)SC(O)(Cn3cncc3Cl)CSc(n4N)nnc4Cc(c5)ccc(c56)cccc6	Mol_1448
	O=c1[nH]c(=O)n(CCC)c(N)c1N(CCOC)C(=O)CSc(n2N)nnc2-c3ccc(F)cc3	Mol_1449
	O=S1(=O)CC(CC1)N(CCO)C(=O)CSc(n2N)nnc2-c3cc(ccc3)OCC	Mol_1450
	Cc1ncc([N+]([O-])=O)n1CCSC(=S)N(CC2)CCC23c4c(cc(Cl)cc4)C(c5cc(OC(F)(F)F)ccc5)=NC3c6c(OC)ccc(Cl)c6	Mol_1451
	n1oc(C)cc1C(=O)CSc(n2N)nnc2-c3c(F)cccc3	Mol_1452
	Fc1c(Cl)cc(cc1)NC(=O)CSc(n2N)nnc2-c3ccc(Cl)cc3	Mol_1453
	Clc1cc(Cl)cc(c1Cl)NC(=O)CSc(n2N)nnc2-c3ccc(Cl)cc3	Mol_1454
	C1CCCC1NC(=O)CSc(n2N)nnc2-c3c(F)cccc3	Mol_1455
	Cc1cc(C)cc(c1)NC(=O)CSc(n2N)nnc2-c3c(F)cccc3	Mol_1456
	c1cccc(c12)nnn(c2=O)CSc(n3N)nnc3-c4c(F)cccc4	Mol_1457
	C1CC1NC(=O)CSc(n2N)nnc2-c(cc3)cc(O)c3C	Mol_1458
	CC(C)(C)NC(=O)NC(=O)CSc(n1N)nnc1-c2c(F)cccc2	Mol_1459
	c1ccccc1NC(=O)CSc(n2N)nnc2-c3c(Cl)ccc(Cl)c3	Mol_1460
	c1c(F)ccc(F)c1NC(=O)CSc(n2N)nnc2-c3ccc(Cl)cc3	Mol_1461
	c1ccccc1NC(=O)CSc(n2N)nnc2-c3c(Cl)cc(Cl)cc3	Mol_1462
	C1CC1N(C)C(=O)CSc(n2N)nnc2-c3c(F)cccc3	Mol_1463
	C1CCCC1NC(=O)CSc(n2N)nnc2-c3c(Cl)cccc3	Mol_1464
	C1CCCCC1NC(=O)CSc(n2N)nnc2-c3c(N)cccc3	Mol_1465
	c1cc(Cl)c(F)cc1CSc(n2N)nnc2-c3ccc(cc3)OC	Mol_1466
	c1ccccc1-n(c2C)nc(C)c2CSc(n3N)nnc3-c4c(F)cccc4	Mol_1467
	c1cc(F)ccc1N(C)C(=O)CSc(n2N)nnc2-c3c(F)cccc3	Mol_1468
	Cc(c1)cc(C)c(c1C)OC(=O)CSc(n2N)nnc2-c(cc3OC)cc(OC)c3OC	Mol_1469
	FC(F)(F)c1ccc(cc1)CSc(n2N)nnc2-c3cc(OC)c(OC)c(c3)OC	Mol_1470
	O=C(O)c1ccc(cc1)CSc(n2N)nnc2-c(cc3)nc(c34)cccc4	Mol_1471
	c1cccc(c12)[nH]c(n2)CSc(n3N)nnc3-c4cc(Cl)c(Cl)cc4	Mol_1472
	c1cccc(F)c1-c2nnc(n2N)SCC(=O)NNC(=O)CSc(n3N)nnc3C(C4)ON=C4c5ccccc5	Mol_1473
	s1cccc1-c(o2)nnc2CSc(n3N)nnc3-c4cc(ccc4)S(=O)(=O)N(C)C	Mol_1474
	COc(cc1)ccc1C(=O)c2c(cccc2)NC(=O)CSc(n3N)nnc3-c4cc(OC)c(OC)c(c4)OC	Mol_1475
	O=C1CSC(=O)N1CCNC(=O)CSc(n2N)nnc2-c3ccc(cc3)S(=O)(=O)c4ccc(Br)cc4	Mol_1476
	O1CCOc(c12)ccc(c2)NC(=O)CSc(n3N)nnc3-c4cc(ccc4)OC(C)C	Mol_1477
	c1cccc(c1c23)n(CC)c2cnc(c3)NC(=O)CSc(n4N)nnc4-c5c(OC)cccc5	Mol_1478
	O=c1[nH]c(=O)n(CC(C)C)c(N)c1N(CC)C(=O)CSc(n2N)nnc2-c3ccc(F)cc3	Mol_1479
	c1cccc(OC)c1N(C(CC2)CS2(=O)=O)C(=O)CSc(n3N)nnc3-c(cc4)ccc4C	Mol_1480
	FC(F)(F)c1cc(ccc1)-c2nnc(n2N)SCC(=O)N(CCOC)c3c(N)n(c(=O)[nH]c3=O)Cc4ccccc4	Mol_1481
	CC1(C)OC(CCO1)SC(SCC2(C(=O)O)CC2)c3cc(ccc3)Cn4c([N+]([O-])=O)cnc4C	Mol_1482
	C1CCCCC1CNC(=O)CSc(n2N)nnc2-c3ccc(cc3)S(=O)(=O)N(CC)CC	Mol_1483
	c1ccccc1C(O)(c2ccccc2)CSc(n3N)nnc3-c4c(Cl)cc(Cl)cc4	Mol_1484
	O=S1(=O)CC(CC1)N(C)C(=O)CSc(n2N)nnc2-c3cc(F)ccc3	Mol_1485
	c1ccc(C)cc1CCNC(=O)CSc(n2N)nnc2-c3cc(OC)c(OC)c(c3)OC	Mol_1486
	c1cccc(N)c1NC(=O)c2ccc(cc2)Sc(n3N)nnc3-c4ccc(cc4)OCC	Mol_1487
	c1cccc(c12)CCCC2NC(=O)CSc(n3N)nnc3-c4cc(F)cc(F)c4	Mol_1488
	CCOc(c(cc1)OC)cc1CCNC(=O)CSc(n2N)nnc2-c3cc(OC)c(OC)c(c3)OC	Mol_1489
	c1cc(Cl)ccc1-c2nnc(n2N)Sc3ccc(Cl)cc3	Mol_1490
	c1ccccc1C(C(=O)O)Sc(n2N)nnc2-c(cc3)nc(c34)cccc4	Mol_1491
	CCOc(cc1)ccc1-c2nnc(n2N)Sc3nccc(C)c3C	Mol_1492
	c1ccnc(Cl)c1NC(=O)CSc(n2N)nnc2-c3ccc(cc3)OC(F)F	Mol_1493
	O1CCCC1CNC(=O)CSc(n2N)nnc2-c3cc(Cl)ccc3	Mol_1494
	O=C(O)c1cc(ccc1)Sc(n2N)nnc2-c3ccc(Cl)cc3	Mol_1495
	c1cccc(c12)[nH]cc2C(=O)C(c3ccc(cc3)OC)Sc(n4N)nnc4-c5ccc(cc5)OC	Mol_1496
	c1cc(Cl)ccc1C(C(=O)O)Sc(n2N)nnc2-c3c(Cl)cccc3	Mol_1497
	c1cc(Cl)ccc1Sc(n2N)nnc2-c3ccc(cc3)S(=O)(=O)c4ccc(Br)cc4	Mol_1498
	O1COc(c12)ccc(c2)CSc(n3N)nnc3-c4ccc(Cl)cc4	Mol_1499
	O1CCOc(c12)ccc(c2)N(C)C(=O)CSc(n3N)nnc3-c4cc(Cl)ccc4	Mol_1500
	CCN(CC)S(=O)(=O)c(ccc1)cc1-c2nnc(n2N)SCc3nnc(n3N)-c4cccs4	Mol_1501
	O=c1[nH]c(=O)n(CC(C)C)c(N)c1N(CC)C(=O)CSc(n2N)nnc2-c3cc(Cl)ccc3	Mol_1502
	c1onc(C)c1C(=O)c2c(ccc(Cl)c2)NC(=O)CS(=O)(=O)CCn3c([N+]([O-])=O)cnc3C	Mol_1503
	O=c1[nH]c(=O)n(CC(C)C)c(N)c1N(CC)C(=O)CSc(n2N)nnc2-c3cc(F)ccc3	Mol_1504
	CCCCn1c(N)c(cc1C)N(CCOC)C(=O)CSc(n2N)nnc2-c(cc3)ccc3C(C)(C)C	Mol_1505
	Cc1cc(c(cc1)OC)NC(=O)CSc(n2N)nnc2-c3ccc(Cl)cc3	Mol_1506
	c1cc(Cl)ccc1CNC(=O)CSc(n2N)nnc2-c3cc(OC)c(OC)c(c3)OC	Mol_1507
	CC(C)c1ccc(cc1)NC(=O)CSc(n2N)nnc2-c3cc(OC)c(OC)c(c3)OC	Mol_1508
	CC(C)(C)c1ccc(cc1)NC(=O)CSc(n2N)nnc2-c3cc(OC)c(OC)c(c3)OC	Mol_1509
	CCC(C)CNC(=O)NC(=O)CSc(n1N)nnc1-c2ccc(cc2)OC	Mol_1510
	c1cc(F)c(Cl)cc1C(=O)CSc(n2N)nnc2-c3cc(OC)c(OC)c(c3)OC	Mol_1511
	c1cc(C)cc(c1C)NC(=O)CSc(n2N)nnc2-c3cc(OC)c(OC)c(c3)OC	Mol_1512
	CCc1ccc(cc1)NC(=O)CSc(n2N)nnc2-c3cc(OC)c(OC)c(c3)OC	Mol_1513
	O1CCCC1CNC(=O)CSc(n2N)nnc2-c3ccc(Cl)cc3	Mol_1514
	C1CCCCC1NC(=O)CSc(n2N)nnc2-c3ccc(cc3)OC(F)F	Mol_1515
	s1ccnc1NC(=O)CSc(n2N)nnc2-c3cc(OC)c(OC)c(c3)OC	Mol_1516
	ClC(Cl)(Cl)C(=O)c1ccc(cc1)CSc(n2N)nnc2-c3cc(OC)c(OC)c(c3)OC	Mol_1517
	COc(cc1)cc(OC)c1NC(=O)CSc(n2N)nnc2-c3cc(OC)c(OC)c(c3)OC	Mol_1518
	O=S1(=O)CC(CC1)N(CC)C(=O)CSc(n2N)nnc2-c(cc3)ccc3C	Mol_1519
	c1cc(F)ccc1CNC(=O)CSc(n2N)nnc2-c3cc(OC)c(OC)c(c3)OC	Mol_1520
	CC(C)c1ccc(cc1)NC(=O)CSc(n2N)nnc2-c3cc(OC)c(O)c(c3)OC	Mol_1521
	Cc(c1)ccc(c1C)NC(=O)NC(=O)CSc(n2N)nnc2-c3ccc(F)cc3	Mol_1522
	CC(=O)Nc(c1)ccc(OC)c1NC(=O)CSc(n2N)nnc2-c3cc(OC)c(cc3)OC	Mol_1523
	c1cc(Cl)ccc1CCC(=O)CSc(n2N)nnc2-c3cc(OC)c(OC)c(c3)OC	Mol_1524
	Cc(c1)ccc(c1C)NC(=O)CSc(n2N)nnc2-c3cc(OC)c(OC)c(c3)OC	Mol_1525
	o1cccc1CNC(=O)CSc(n2N)nnc2-c3cc(Cl)ccc3	Mol_1526
	s1ccnc1NC(=O)CSc(n2N)nnc2-c3c(OC)cccc3	Mol_1527
	c1cc(F)ccc1NC(=O)CSc(n2N)nnc2-c3ccc(cc3)S(=O)(=O)c4ccc(Cl)cc4	Mol_1528
	CC(=O)Nc(c1)ccc(OC)c1NC(=O)CSc(n2N)nnc2-c(cc3)ccc3C	Mol_1529
	c1cc(Cl)cc(Cl)c1NC(=O)CSc(n2N)nnc2-c3cc(F)ccc3	Mol_1530
	c1cc(F)ccc1C(O)(Cn2cncn2)CSc(n3N)nnc3-c(cc4)ccc4C	Mol_1531
	c1cc(N)nc(C)c1CNC(=O)CSc(n2N)nnc2-c(cc3)ccc3C(C)C	Mol_1532
	c1cc(C)cc(c1C)NC(=O)CSc(n2N)nnc2-c3cc(OC)c(OC)c(c3)OC	Mol_1533
	Cc1cc(ccc1)-c2nnc(n2N)Sc(cc3)ccc3N(C)C	Mol_1534
	O=C(O)CSc(n1N)nnc1-c2c(Cl)cc(Cl)cc2	Mol_1535
	C=C(C)CSc(n1N)nnc1-c(c2)cc(C)c(c2C)OC	Mol_1536
	N#CC(C)Sc(n1N)nnc1-c2ccc(cc2)OC	Mol_1537
	c1cc(Cl)ccc1CSc(n2N)nnc2-c3c(F)cccc3	Mol_1538
	Cc1onc(C)c1CSc(n2N)nnc2-c3cc(c(cc3)OC)OCC(O4)C(O)C(OC)C4(c5ccc(Cl)cc5)c6ccccc6	Mol_1539
	c1cccc(c12)N(C)C(/C2(C)C)=C\C(=O)CCCSc(nnc3-c4ccccc4)n3NC(=O)c5ccccc5	Mol_1540
	c1ccccc1Cn(c(=O)[nH]c2=O)c(N)c2N(CC)C(=O)CSc(n3N)nnc3-c4c(Cl)cccc4	Mol_1541
	O=c1[nH]c(=O)n(CCC)c(N)c1N(CC)C(=O)CSc(n2N)nnc2-c3c(Cl)cccc3	Mol_1542
	c1ccccc1Cn(c(=O)[nH]c2=O)c(N)c2N(C)C(=O)CSc(n3N)nnc3-c4c(OC)cccc4	Mol_1543
	CCN(CC)S(=O)(=O)c(ccc1)cc1-c2nnc(n2N)SCc3nnc(o3)-c4cccs4	Mol_1544
	c1cccc(c12)CCCC2NC(=O)CSc(n3N)nnc3-c4ccc(cc4)OC(F)F	Mol_1545
	c1ccccc1C2(C(=O)O)C(=O)C(C(=O)O2)CSc(n3N)nnc3-c4ccc(cc4)OC(F)F	Mol_1546
	O1CCCC1Cn(c(C)c2)c(C)c2C(=O)CSc(n3N)nnc3-c4cc(F)ccc4	Mol_1547
	Cc(c1)ccc(c12)[nH]c(n2)CSc(n3N)nnc3-c4ccc(Cl)cc4	Mol_1548
	c1ccccc1NC(=O)CSc(n2N)nnc2-c3c(Cl)cc(Cl)c(F)c3	Mol_1549
	CC(C)NC(=O)NC(=O)CSc(n1N)nnc1-c2c(F)cccc2	Mol_1550
	C1CCCCC1NC(=O)CSc(n2N)nnc2-c3c(Cl)cccc3	Mol_1551
	C=C(C)CSc(n1N)nnc1-c2nc(nc(n2)N)Nc3ccccc3	Mol_1552
	C1CCCCC1NC(=O)CSc(n2N)nnc2-c3c(F)cccc3	Mol_1553
	COc(cc1)ccc1OCCSc(n2N)nnc2-c3c(Cl)cc(Cl)c(F)c3	Mol_1554
	c1ccccc1NC(=O)CSc(n2N)nnc2-c3c(O)ccc(Cl)c3	Mol_1555
	Cc1ccc(cc1)NC(=O)CSc(n2N)nnc2-c3c(OC)cccc3	Mol_1556
	c1cc(Cl)ccc1N(C)C(=O)CSc(n2N)nnc2-c3c(F)cccc3	Mol_1557
	C1CCCCC1N(C)C(=O)CSc(n2N)nnc2-c3c(O)cccc3	Mol_1558
	CC(C)OC(=O)CSc(n1N)nnc1-c2cc(Cl)c(F)cc2	Mol_1559
	Cc(n1)n(N)c(C)c1C(=O)CSc(n2N)nnc2-c3c(Cl)cc(Cl)cc3	Mol_1560
	c1cccc(c1C)-c(n2)occ2CSc(n3N)nnc3-c4c(F)cccc4	Mol_1561
	Cc(c1)cc(C)c(c1C)NC(=O)CSc(n2N)nnc2-c3c(F)cccc3	Mol_1562
	C1CCCCCC1NC(=O)CSc(n2N)nnc2-c3c(F)cccc3	Mol_1563
	c1c(F)c(F)c(F)cc1C(=O)CSc(n2N)nnc2-c(cc3OC)cc(OC)c3OC	Mol_1564
	c1cc(C)cc(c1C)NC(=O)CSc(n2N)nnc2-c3c(O)cccc3	Mol_1565
	CC(C)OC(=S)n1c([N+]([O-])=O)cnc1C	Mol_1566
	O1CCOc(c12)ccc(c2)NC(=O)CSc(n3N)nnc3-c(ccc4)cc4C(C)(C)C	Mol_1567
	FC(F)Oc(cc1)ccc1N(C)C(=O)CSc(n2N)nnc2-c3cc(Cl)ccc3	Mol_1568
	O1CCOc(c12)ccc(c2)NC(=O)CSc(n3N)nnc3-c4cc(OCC)c(cc4)OCC	Mol_1569
	O1CCOc(c12)ccc(c2)NC(=O)CSc(n3N)nnc3-c4ccc(cc4)OCC	Mol_1570
	O=S1(=O)CC(CC1)NC(=O)CSc(n2N)nnc2-c(ccc3)cc3C(C)(C)C	Mol_1571
	c1cccc(c1C)Nc(nc(n2)N)nc2CSc(n3N)nnc3-c4cc(OC)c(cc4)OC	Mol_1572
	CC(C)(C)c1cc(F)c(cc1)NC(=O)CSc(n2N)nnc2-c3cc(OC)c(OC)c(c3)OC	Mol_1573
	c1cccc(c12)C(=O)N(C2=O)CCNC(=O)CSc(n3N)nnc3-c4cc(F)cc(Cl)c4	Mol_1574
	O=S(=O)(Cl)c(c1)ccc(OC)c1NC(=O)CSc(n2N)nnc2-c3ccc(cc3)OC	Mol_1575
	Clc1cc(Cl)cc(c1Cl)NC(=O)CSc(n2N)nnc2-c3ccc(cc3)S(=O)(=O)c4ccc(Br)cc4	Mol_1576
	c1cc(C)ccc1CNC(=O)CSc(n2N)nnc2-c3cc(ccc3)S(=O)(=O)N(CC)CC	Mol_1577
	C1CC1COc2c(OC)ccc(c2)NC(=O)CSc(n3N)nnc3-c4cc(OC)c(OC)c(c4)OC	Mol_1578
	O=S1(=O)CC(CC1)N(C)C(=O)CSc(n2N)nnc2-c3cc(Cl)ccc3	Mol_1579
	O1CCOc(c12)cccc2NC(=O)CSc(n3N)nnc3-c4ccc(cc4)OC	Mol_1580
	c1ccc(F)cc1-c2nnc(n2N)SCc(c3C)nc(N)nc3Nc(c4C)cccc4	Mol_1581
	o1cccc1CNC(=O)CSc(n2N)nnc2-c3cc(OC(F)F)ccc3	Mol_1582
	Cc1onc(C)c1CSc(n2N)nnc2-c3c(Cl)cccc3	Mol_1583
	CCCCn(c(=O)[nH]c1=O)c(N)c1N(CCOC)C(=O)CSc(n2N)nnc2-c3ccc(F)cc3	Mol_1584
	c1ccccc1CC2CCCN(C2)C(=O)CSc(n3N)nnc3-c4cc(ccc4)S(=O)(=O)N(CC)CC	Mol_1585
	CSc(n1N)nnc1-c2c(Cl)cccc2	Mol_1586
	c1ccccc1/C=N/n2c(nnc2-c3ccccc3)SCCOc(c4OC)ccc(c4)OC	Mol_1587
	CC(C)NC(=O)c1ccc(cc1)CSc(n2N)nnc2-c3cc(OC)c(OC)c(c3)OC	Mol_1588
	c1cc(C)c(C)cc1CCNC(=O)CSc(n2N)nnc2-c3cc(OC)c(OC)c(c3)OC	Mol_1589
	O=S1(=O)CC(CC1)N(C)C(=O)CSc(n2N)nnc2-c3ccc(F)cc3	Mol_1590
	CN(C)c1ccc(cc1)NC(=O)CSc(n2N)nnc2-c3cc(OC)c(OC)c(c3)OC	Mol_1591
	CN(C)C(=O)c1ccc(cc1)-c2nnc(n2N)SCC3(C(=O)OCC)CCCCC3	Mol_1592
	c1ccccc1CCN(c2ccccc2)C(=O)CSc(n3N)nnc3-c4c(OC)cccc4	Mol_1593
	c1cc(C)ccc1CCNC(=O)CSc(n2N)nnc2-c3cc(OC)c(OC)c(c3)OC	Mol_1594
	C1CCCCN1c(cc2)ccc2C(=O)CSc(n3N)nnc3-c4cc(OC)c(OC)c(c4)OC	Mol_1595
	c1cc(S(=O)(=O)N)ccc1NC(=O)CSc(n2N)nnc2-c3c(OC)cccc3	Mol_1596
	O1CCOc(c12)ccc(c2)NC(=O)CSc(n3N)nnc3-c(c4C)cccc4	Mol_1597
	COc(cc1)c(OC)cc1CCNC(=O)CSc(n2N)nnc2-c3cc(OC)c(OC)c(c3)OC	Mol_1598
	c1cccc(c12)N(CCC2)C(=O)CSc(n3N)nnc3-c4cc(Cl)c(Cl)cc4	Mol_1599
	O=S1(=O)CC(CC1)NC(=O)CSc(n2N)nnc2-c(cc3)ccc3C(C)(C)C	Mol_1600
	COc1c(OC)ccc(c1)NC(=O)NC(=O)CSc(n2N)nnc2-c3cc(OC)c(OC)c(c3)OC	Mol_1601
	COc(cc1)c(OC)cc1CCNC(=O)CSc(n2N)nnc2-c3cc(OC)cc(c3)OC	Mol_1602
	o1cccc1CNC(=O)NC(=O)CSc(n2N)nnc2-c3ccc(Cl)cc3	Mol_1603
	Cc1cc(c(cc1)OC)NC(=O)CSc(n2N)nnc2-c(cc3)ccc3C(C)C	Mol_1604
	COc1c(O)cc(cc1)NC(=O)CSc(n2N)nnc2-c(c3C)cccc3	Mol_1605
	C1CCCCC1N(C)C(=O)CSc(n2N)nnc2-c3ccc(cc3)N(CCCl)CCCl	Mol_1606
	CC(C)(C)c1ccc(cc1)-c2nnc(n2N)SCC(=O)Nc3ccc(cc3)N4CCOCC4	Mol_1607
	c1ccccc1/C=N/n2c(-c3c(Cl)cccc3)nnc2CSc(n4N)nnc4-c(c5C)cccc5	Mol_1608
	O1COc(c12)ccc(c2)NC(=O)CSc(n3N)nnc3-c(c4C)cccc4	Mol_1609
	CNC(=O)NC(=O)CSc(n1N)nnc1-c2c(cccc2)S(=O)(=O)N(CC)CC	Mol_1610
	O=C1CSC(=O)N1CCNC(=O)CSc(n2N)nnc2-c3ccc(Cl)cc3	Mol_1611
	Cc(c1)ccc(c1C)NC(=O)NC(=O)CSc(n2N)nnc2-c(cc3)ccc3C(C)(C)C	Mol_1612
	O=c1[nH]c(=O)n(CC(C)C)c(N)c1N(CC)C(=O)CSc(n2N)nnc2-c(cc3)ccc3C(C)(C)C	Mol_1613
	C1CC1COc(c(cc2)OC(F)F)cc2-c3nnc(n3N)SCc(n4)[nH]c(c45)cccc5	Mol_1614
	c1ccccc1Cn(c(=O)[nH]c2=O)c(N)c2N(CC)C(=O)CSc(n3N)nnc3-c4c(F)cccc4	Mol_1615
	c1cccc(c12)N(CCC2)C(=O)CSc(n3N)nnc3-c4cc(ccc4)S(=O)(=O)N(CC)CC	Mol_1616
	CN(C)C(=S)SCCn1c([SH+]([O-])=O)cnc1C	Mol_1617
	c1cc(Cl)ccc1-c2nnc(n2N)Sc3ccc(cc3)S(=O)(=O)O	Mol_1618
	CC(C)(C)c1ccc(cc1)-c2nnc(n2N)S(=O)(=O)Cc3ccccc3	Mol_1619
	Fc1c(Cl)cc(cc1)NC(=O)CSc(n2N)nnc2-c3ccc(F)cc3	Mol_1620
	COc(cc1)ccc1NC(=O)CSc(n2N)nnc2-c3c(OC)cccc3	Mol_1621
	Cc1cc(no1)NC(=O)CSc(n2N)nnc2-c3c(F)cccc3	Mol_1622
	Cc(c1)cc(C)c(c1C)NC(=O)CSc(n2N)nnc2-c3cc(OC)c(OC)c(c3)OC	Mol_1623
	c1ccccc1NC(=O)CSc(n2N)nnc2-c3c(O)cc(Cl)c(F)c3	Mol_1624
	CCN(CC)S(=O)(=O)c(ccc1)cc1-c2nnc(n2N)Sc(cc3)ccc3F	Mol_1625
	COc1c(OC)cc(cc1OC)NC(=O)CSc(n2N)nnc2-c3cc(OC)cc(c3)OC	Mol_1626
	c1cc(Cl)cc(Cl)c1NC(=O)CSc(n2N)nnc2-c3ccc(F)cc3	Mol_1627
	Cc(c1)ccc(c12)[nH]c(n2)CSc(n3N)nnc3-c4ccc(cc4)OC	Mol_1628
	c1ccccc1NC(=O)CSc(n2N)nnc2-c3c(Cl)ccc(F)c3	Mol_1629
	Clc1cccc(F)c1N(C)C(=O)CSc(n2N)nnc2-c3c(F)cccc3	Mol_1630
	COc(c1)cc(OC)cc1NC(=O)CSc(n2N)nnc2-c3cc(OC)c(OC)c(c3)OC	Mol_1631
	c1ccnc(Cl)c1NC(=O)CSc(n2N)nnc2-c3c(O)cccc3	Mol_1632
	c1cc(Cl)cc(c1C(F)(F)F)NC(=O)CSc(n2N)nnc2-c3ccc(Cl)cc3	Mol_1633
	COc1c(OC)ccc(c1)NC(=O)CSc(n2N)nnc2-c3c(OC)cccc3	Mol_1634
	Cc(c1)ccc(c1C)NC(=O)CSc(n2N)nnc2-c3c(Cl)cccc3	Mol_1635
	Cc1c(C)cccc1NC(=O)CSc(n2N)nnc2-c3c(Cl)cccc3	Mol_1636
	COc(cc1)ccc1NC(=O)CSc(n2N)nnc2-c3c(OC)cccc3	Mol_1637
	COc(cc1)ccc1NC(=O)CSc(n2N)nnc2-c3ccc(cc3)S(=O)(=O)N4CCCCC4	Mol_1638
	c1ccc(Cl)cc1CCNC(=O)CSc(n2N)nnc2-c3cc(OC)c(OC)c(c3)OC	Mol_1639
	CC(=O)Nc(c1)ccc(OC)c1NC(=O)CSc(n2N)nnc2-c3cc(Cl)ccc3	Mol_1640
	c1ccc(F)cc1CCNC(=O)CSc(n2N)nnc2-c3cc(OC)c(OC)c(c3)OC	Mol_1641
	Cc1cc(c(cc1)OC)NC(=O)CSc(n2N)nnc2-c(ccc3)cc3CCC	Mol_1642
	O=c1[nH]c(=O)n(C(C)C)c(N)c1N(CC(C)C)C(=O)CSc(n2N)nnc2-c(cc3)ccc3C	Mol_1643
	CC(C)CNC(=O)c1ccc(cc1)NC(=O)CSc(n2N)nnc2-c3cc(F)ccc3	Mol_1644
	COc(cc1)ccc1C(=O)NNC(=O)CSc(n2N)nnc2-c3ccc(cc3)S(=O)(=O)N(CC)CC	Mol_1645
	ClCC(=O)OC1CCN(CC1)C(=S)SCCn2c(SC)ncc2[N+]([O-])=O	Mol_1646
	C1OCCN1c(cc2)ccc2NC(=O)CSc(n3N)nnc3-c4cc(F)ccc4	Mol_1647
	CC(=O)Nc(c1)ccc(OC)c1NC(=O)CSc(n2N)nnc2-c3cc(F)ccc3	Mol_1648
	C1COCCN1c(cc2)ccc2NC(=O)CSc(n3N)nnc3-c4ccc(cc4)S(=O)(=O)c5ccc(Br)cc5	Mol_1649
	C1COCCN1c(cc2)ccc2NC(=O)CSc(n3N)nnc3-c4c(OCC)cccc4	Mol_1650
	c1cccc(c12)CCC2CNC(=O)CSc(n3N)nnc3-c4cc(Cl)ccc4	Mol_1651
	Cc1cc(on1)NC(=O)CSc(n2N)nnc2-c3cc(ccc3)S(=O)(=O)N(CC)CC	Mol_1652
	c1ccccc1C(N2)N(C)C(N)C(C2=O)C(=O)CSc(n3N)nnc3-c4c(F)cccc4	Mol_1653
	c1ccc(Cl)cc1-c2nnc(n2N)Sc3ccc(Cl)cc3	Mol_1654
	COc1cc(ccc1)S(=O)(=O)c(c2)ccc(Cl)c2NC(=O)CSc(n3N)nnc3-c4ccc(cc4)OCC	Mol_1655
	Cc1onc(C)c1CSc(n2N)nnc2-c3cccc(c34)cccc4	Mol_1656
	c1ccccc1C(C(=O)O)Sc(n2N)nnc2-c3c(Cl)cc(Cl)c(F)c3	Mol_1657
	c1ccccc1C(C([O-])=O)Sc(n2N)nnc2-c3c(Cl)cc(Cl)cc3	Mol_1658
	Cc(c1)ccc(C)c1CSc(n2N)nnc2-c3c(OC)cccc3	Mol_1659
	C=C(C)CSc(n1N)nnc1-c2c(cccc2)-c3c(Cl)ccc(Cl)c3	Mol_1660
	c1cccc(c12)[nH]c(n2)CSc(n3N)nnc3-c4c(Br)cccc4	Mol_1661
	O1CCOc(c12)ccc(c2)NC(=O)CSc(n3N)nnc3-c(cc4)ccc4C(C)(C)C	Mol_1662
	CC(=O)Nc(c1)ccc(OC)c1NC(=O)CSc(n2N)nnc2-c3cc(OC)c(OC)c(c3)OC	Mol_1663
	CCCc1ccc(cc1)NC(=O)CSc(n2N)nnc2-c3cc(OC)c(OC)c(c3)OC	Mol_1664
	c1ccnc(Cl)c1NC(=O)CSc(n2N)nnc2-c3c(OC)cccc3	Mol_1665
	COCCN(C(C)C)C(=O)CSc(n1N)nnc1-c2ccc(cc2)OC(F)F	Mol_1666
	FC(F)(F)c1ccc(cc1)NC(=O)CSc(n2N)nnc2-c3cc(OC)c(OC)c(c3)OC	Mol_1667
	Cc1cc(Cl)c(cc1)NC(=O)CSc(n2N)nnc2-c3cc(OC)c(OC)c(c3)OC	Mol_1668
	C1COCCN1c(cc2)ccc2NC(=O)CSc(n3N)nnc3-c4ccc(cc4)OC	Mol_1669
	CN(C)c(cc1)ccc1CN(C)C(=O)CSc(n2N)nnc2-c3cc(OC)c(OC)c(c3)OC	Mol_1670
	COc(cc1)cc(OC)c1NC(=O)CSc(n2N)nnc2-c(cc3)ccc3C(C)C	Mol_1671
	c1cc(S(=O)(=O)N)ccc1NC(=O)CSc(n2N)nnc2-c3ccc(cc3)OC(F)F	Mol_1672
	C1CCCC1NC(=O)NC(=O)CSc(n2N)nnc2-c3ccc(cc3)OC(F)F	Mol_1673
	Cc1c(F)ccc(c1)NC(=O)CSc(n2N)nnc2-c3cc(OC)c(OC)c(c3)OC	Mol_1674
	COc(cc1)ccc1CCNC(=O)CSc(n2N)nnc2-c3cc(OC)c(OC)c(c3)OC	Mol_1675
	CC(=O)Nc(c1)ccc(OC)c1NC(=O)CSc(n2N)nnc2-c3ccc(cc3)OC	Mol_1676
	O=S1(=O)CC(CC1)N(C)C(=O)CSc(n2N)nnc2-c(cc3)ccc3C(C)(C)C	Mol_1677
	Cc(c1)cc(Cl)c(c1C)NC(=O)CSc(n2N)nnc2-c(cc3OC)cc(OC)c3OC	Mol_1678
	O=S1(=O)CC(CC1)N(C)C(=O)CSc(n2N)nnc2-c(cc3)ccc3C(C)(C)C	Mol_1679
	O1CCCC1CNC(=O)CSc(n2N)nnc2-c3cc(ccc3)S(=O)(=O)N(C)C	Mol_1680
	c1ccccc1Cn(c(=O)[nH]c2=O)c(N)c2N(C)C(=O)CSc(n3N)nnc3-c4c(Cl)cc(Cl)c(F)c4	Mol_1681
	O=c1[nH]c(=O)n(CC(C)C)c(N)c1N(CCOC)C(=O)CSc(n2N)nnc2-c(cc3)ccc3C	Mol_1682
	O1CCOc(c12)ccc(c2)NC(=O)CSc(n3N)nnc3-c4cc(OCC)c(cc4)OC(C)C	Mol_1683
	c1cc(C)cc(c1C)NC(=O)CSc(n2N)nnc2-c(cc3C)cc(c3)OCc4cccs4	Mol_1684
	ClC(Cl)(Cl)c1ccc(cc1)Sc(n2N)nnc2-c3ccc(S(=O)(=O)Cl)cc3	Mol_1685
	c1cc(F)ccc1CSc(n2N)nnc2-c3cc(F)cc(Cl)c3	Mol_1686
	C=C(C)CSc(n1N)nnc1-c2c(N)n(C)c(=O)n(C)c2=O	Mol_1687
	c1cc(Cl)ccc1NC(=O)CSc(n2N)nnc2-c3c(OC)cccc3	Mol_1688
	Cc1cc(no1)NC(=O)CSc(n2N)nnc2-c3cc(OC)c(OC)c(c3)OC	Mol_1689
	C1CCCCC1N(C)C(=O)CSc(n2N)nnc2-c3c(F)cccc3	Mol_1690
	Cc1ccc(cc1)NC(=O)NC(=O)CSc(n2N)nnc2-c3c(F)cccc3	Mol_1691
	C=C(C)CSc(n1N)nnc1-c2c(N)n(nn2)Cc3cc(C)ccc3	Mol_1692
	Cc(c1)cc(C)c(c1C)NC(=O)CSc(n2N)nnc2-c3c(OC)cccc3	Mol_1693
	c1cc(F)ccc1NC(=O)CSc(n2N)nnc2-c3ccc(cc3)OC(F)F	Mol_1694
	Clc1cccc(Cl)c1NC(=O)CSc(n2N)nnc2-c3cc(F)cc(Cl)c3	Mol_1695
	c1ccc(C)c(c1C)NC(=O)NC(=O)CSc(n2N)nnc2-c3c(F)cccc3	Mol_1696
	CC(C)CNC(=O)NC(=O)CSc(n1N)nnc1-c2c(F)cccc2	Mol_1697
	c1ccccc1C(=O)NNC(=O)CSc(n2N)nnc2-c3c(Cl)cc(Cl)cc3	Mol_1698
	C1CCCCC1N(C)C(=O)CSc(n2N)nnc2-c3c(Cl)cccc3	Mol_1699
	c1ccccc1CNC(=O)CSc(n2N)nnc2-c3c(Cl)cc(Cl)c(F)c3	Mol_1700
	Cc1c(C)csc1NC(=O)CSc(n2N)nnc2-c3c(F)cccc3	Mol_1701
	COc(cc1)ccc1NC(=O)CSc(n2N)nnc2-c3c(F)cccc3	Mol_1702
	c1ccc(Cl)cc1N(C)C(=O)CSc(n2N)nnc2-c3c(Cl)cccc3	Mol_1703
	c1cccc(Cl)c1NC(=O)CSc(n2N)nnc2-c3c(OC)cccc3	Mol_1704
	c1cc(C)cc(c1C)NC(=O)CSc(n2N)nnc2-c3c(Cl)cccc3	Mol_1705
	s1cccc1CNC(=O)CSc(n2N)nnc2-c3cc(ccc3)S(=O)(=O)N(CC)CC	Mol_1706
	c1cc(Br)ccc1N(CCOC)C(=O)CSc(n2N)nnc2-c3ccc(cc3)OC(F)F	Mol_1707
	O1COc(c12)ccc(c2)NC(=O)CSc(n3N)nnc3-c4ccc(cc4)S(=O)(=O)c5ccc(Br)cc5	Mol_1708
	FC(F)Oc(cc1)ccc1-c2nnc(n2N)SCc3nc(nc(n3)N)Nc(c4C)cccc4	Mol_1709
	c1cc(C)ccc1CCNC(=O)CSc(n2N)nnc2-c3cc(ccc3)S(=O)(=O)N(CC)CC	Mol_1710
	o1cccc1CNC(=O)CSc(n2N)nnc2-c3ccc(cc3)S(=O)(=O)N4CCCCCC4	Mol_1711
	CC1CCC(CC1)NC(=O)CSc(n2N)nnc2-c3cc(ccc3)S(=O)(=O)N(CC)CC	Mol_1712
	Cc1ccc(cc1)-c2nnc(n2N)SCC(=O)N(CC3)CCC3C(=O)NCc4cccs4	Mol_1713
	O1CCCC1CNC(=O)CSc(n2N)nnc2-c3ccc(cc3)S(=O)(=O)c(cc4)ccc4F	Mol_1714
	c1ccccc1Cn2c(C)cc(c2C)NC(=O)CSc(n3N)nnc3-c4c(Cl)cc(Cl)c(F)c4	Mol_1715
	CCCCn(c(=O)[nH]c1=O)c(N)c1N(CCOC)C(=O)CSc(n2N)nnc2-c(cc3)ccc3C(C)C	Mol_1716
	CCCCn(c(=O)[nH]c1=O)c(N)c1N(CCOC)C(=O)CSc(n2N)nnc2-c(cc3)ccc3C(C)(C)C	Mol_1717
	C1COCCN1C(=O)CSc(n2N)nnc2-c3c(Cl)cccc3	Mol_1718
	C1COCCN1C(=O)CSc(n2N)nnc2-c3c(F)cccc3	Mol_1719
	o1cccc1CNC(=O)CSc(n2N)nnc2-c3c(N)cccc3	Mol_1720
	CCOC(=O)C1CCN(CC1)C(=S)n2c([N+]([O-])=O)cnc2C	Mol_1721
	Cc1onc(C)c1CSc(n2N)nnc2-c3cc(OC)c(OC)c(c3)OC	Mol_1722
	Clc1cccc(c1Cl)NC(=O)CSc(n2N)nnc2-c3c(Cl)cccc3	Mol_1723
	CCN(CC)CCSc(n1N)nnc1-c2c(OC)ccc(c2)OC	Mol_1724
	O1COc(c12)ccc(c2)NC(=O)CSc(n3N)nnc3-c4cc(Cl)ccc4	Mol_1725
	O1CCOc(c12)ccc(c2)NC(=O)CSc(n3N)nnc3-c4ccc(cc4)OC	Mol_1726
	O1COc(c12)ccc(c2)NC(=O)CSc(n3N)nnc3-c4cc(F)ccc4	Mol_1727
	Clc1cccc(c1N)NC(=O)CSc(n2N)nnc2-c3c(OCC)cccc3	Mol_1728
	c1cc(Cl)ccc1CCNC(=O)CSc(n2N)nnc2-c3cc(OC)c(OC)c(c3)OC	Mol_1729
	o1cccc1CNC(=O)NC(=O)NC(=O)CSc(n2N)nnc2-c3ccc(Cl)cc3	Mol_1730
	c1cc(F)ccc1CCNC(=O)CSc(n2N)nnc2-c3cc(OC)c(OC)c(c3)OC	Mol_1731
	COc(cc1)ccc1NCCNC(=O)CSc(n2N)nnc2-c3cc(OC)c(OC)c(c3)OC	Mol_1732
	c1cc(F)c(C)cc1CNC(=O)CSc(n2N)nnc2-c3cc(OC)c(OC)c(c3)OC	Mol_1733
	O1CCOc(c12)ccc(c2)NC(=O)CSc(n3N)nnc3-c4cc(OC)cc(c4)OC	Mol_1734
	C1COCCN1c(cc2)ccc2NC(=O)CSc(n3N)nnc3-c4cc(F)ccc4	Mol_1735
	o1cccc1CNC(=O)CSc(n2N)nnc2-c3ccc(cc3)OC(F)F	Mol_1736
	CC(=O)Nc(c1)ccc(OC)c1NC(=O)CSc(n2N)nnc2-c3ccc(F)cc3	Mol_1737
	O=S1(=O)CC(CC1)N(C)C(=O)CSc(n2N)nnc2-c3ccc(cc3)OC	Mol_1738
	C1CCCC=C1CCNC(=O)CSc(n2N)nnc2-c(cc3)ccc3C(C)(C)C	Mol_1739
	C1COCCN1c(cc2)ccc2NC(=O)CSc(n3N)nnc3-c4cc(Cl)ccc4	Mol_1740
	Cc1ccc(cc1)NC(=O)CSc(n2N)nnc2-c3cc(OC(C)C)cc(c3)OC(F)F	Mol_1741
	COc(cc1)c(OC)cc1CCNC(=O)CSc(n2N)nnc2-c(cc3)ccc3C(C)(C)C	Mol_1742
	Clc1cccc(c1Cl)NC(=O)CSc(n2N)nnc2-c3ccc(cc3)OC(F)F	Mol_1743
	C1CCCCC1NC(=O)NC(=O)CSc(n2N)nnc2-c3c(OC)cccc3	Mol_1744
	C1CCCCC1N(CC)C(=O)CSc(n2N)nnc2-c3ccc(cc3)OC(F)F	Mol_1745
	CC(=O)Nc(c1)ccc(OC)c1NC(=O)CSc(n2N)nnc2-c3ccc(Cl)cc3	Mol_1746
	O1COc(c12)ccc(c2)NC(=O)CSc(n3N)nnc3-c4ccc(cc4)OC	Mol_1747
	C1COCCN1c(cc2)ccc2NC(=O)CSc(n3N)nnc3-c4cc(OC)cc(c4)OC	Mol_1748
	c1cccc(c1c23)n(CC)c2ccc(c3)NC(=O)CSc(n4N)nnc4-c5c(O)cccc5	Mol_1749
	c1cccc(c12)CCCC2NC(=O)NC(=O)CSc(n3N)nnc3-c4ccc(cc4)OC(F)F	Mol_1750
	O1CCCC1CNC(=O)CSc(n2N)nnc2-c3cc(ccc3)S(=O)(=O)N(CC)CC	Mol_1751
	c1ccccc1Cn(c(=O)[nH]c2=O)c(N)c2N(CCCC)C(=O)CSc(n3N)nnc3-c4c(Cl)cccc4	Mol_1752
	n1cccn1-c(cccc2)c2C(=O)N(c(cc3)ccc3C)C(=O)CSc(n4N)nnc4-c5ccc(cc5)OC(F)F	Mol_1753
	O=S1(=O)CC(CC1)NC(=O)CSc(n2N)nnc2-c3ccc(cc3)S(=O)(=O)N(CC)CC	Mol_1754
	c1cccc(c12)[nH]c(n2)CSc(n3N)nnc3-c4cc(F)cc(Cl)c4	Mol_1755
	c1cc(Cl)ccc1-c2nnc(n2N)Sc3cc(Cl)cc(Cl)c3	Mol_1756
	Cc1csc(n1)NC(=O)CSc(n2N)nnc2-c3c(Cl)cccc3	Mol_1757
	CC(C)CCNC(=O)NC(=O)CSc(n1N)nnc1-c2c(F)cccc2	Mol_1758
	C1CCCC1NC(=O)NC(=O)CSc(n2N)nnc2-c3c(Cl)cccc3	Mol_1759
	C1CCCC1NC(=O)NC(=O)CSc(n2N)nnc2-c3c(F)cccc3	Mol_1760
	C1CCCCC1(C#N)NC(=O)CSc(n2N)nnc2-c3ccc(Cl)cc3	Mol_1761
	C1CCCCC1CNC(=O)CSc(n2N)nnc2-c3c(OC)cccc3	Mol_1762
	C1CCCCC1N(CC)C(=O)CSc(n2N)nnc2-c3c(F)cccc3	Mol_1763
	c1ccccc1-c(nn2)n(c23)N=C(CS3)c4ccc([N+]([O-])=O)cc4	Mol_1764
	c1c(Cl)ccc(Cl)c1N(C)C(=O)CSc(n2N)nnc2-c3c(F)cccc3	Mol_1765
	C1CCCC(C1C)NC(=O)CSc(n2N)nnc2-c3cc(ccc3)S(=O)(=O)N(CC)CC	Mol_1766
	c1cc(F)ccc1CNC(=O)CSc(n2N)nnc2-c3c(OC)cccc3	Mol_1767
	n1ccccc1NC(=O)CSc(n2N)nnc2-c3c(Cl)cc(Cl)c(F)c3	Mol_1768
	Cc1ccc(cc1)NC(=O)CSc(n2N)nnc2-c3cc(F)c(Cl)c(Cl)c3	Mol_1769
	O1COc(c12)ccc(c2)Cn(c(C)c3)c(C)c3C(=O)CSc(n4N)nnc4-c5ccc(F)cc5	Mol_1770
	COc1c(OC)ccc(c1)NC(=O)CSc(n2N)nnc2-c3cc(ccc3)S(=O)(=O)N(CC)CC	Mol_1771
	c1cccc(OC)c1NC(=O)CSc(n2N)nnc2-c3cccc(c34)cccc4	Mol_1772
	c1ccccc1C(=O)NNC(=O)CSc(n2N)nnc2-c3c(Cl)cc(Cl)c(F)c3	Mol_1773
	O1CCCC1CNC(=O)NC(=O)CSc(n2N)nnc2-c3cc(Cl)ccc3	Mol_1774
	C1COCCN1c(cc2)ccc2NC(=O)CSc(n3N)nnc3-c4ccc(Cl)cc4	Mol_1775
	CCCCn(c(=O)[nH]c1=O)c(N)c1N(CC(C)C)C(=O)CSc(n2N)nnc2-c3cc(OC)c(cc3)OC	Mol_1776
	c1cccc(c1C)NC(=O)CSc(n2N)nnc2-c3c(Cl)cc(Cl)c(F)c3	Mol_1777
	Cc1c(C)n(C2CC2)c(=O)c(c1)NC(=O)CSc(n3N)nnc3-c4cc(F)ccc4	Mol_1778
	c1cccc(c12)cccc2NC(=O)CSc(n3N)nnc3-c4c(OC)cccc4	Mol_1779
	c1cccc(N)c1Nc2nc(N)nc(c2C#N)CSc(n3N)nnc3-c4ccc(cc4)OC	Mol_1780
	c1ccccc1Cn(c(=O)[nH]c2=O)c(N)c2N(C(C)CC)C(=O)CSc(n3N)nnc3-c4c(F)cccc4	Mol_1781
	c1ccccc1Cn(c(=O)[nH]c2=O)c(N)c2N(CC)C(=O)CSc(n3N)nnc3-c4c(Cl)c(F)ccc4	Mol_1782
	c1ccccc1Cn(c(=O)[nH]c2=O)c(N)c2N(CCOC)C(=O)CSc(n3N)nnc3-c4c(Cl)cccc4	Mol_1783
	C1CCCCN1S(=O)(=O)c(c2)ccc(Cl)c2NC(=O)CSc(n3N)nnc3-c4ccc(cc4)OCC	Mol_1784
	c1ccccc1Cn(c(=O)[nH]c2=O)c(N)c2N(CC)C(=O)CSc(n3N)nnc3-c4c(Cl)cc(Cl)cc4	Mol_1785
	O=c1[nH]c(=O)n(CC(C)C)c(N)c1N(CCOC)C(=O)CSc(n2N)nnc2-c(cc3)ccc3C(C)C	Mol_1786
	c1ccccc1OC(C)C(=O)Nn2c(ncc2C)NC(=O)CSc(n3N)nnc3-c4c(F)cccc4	Mol_1787
	C1CCCC1NC(=O)CSc(n2N)nnc2-c3c(cccc3)S(=O)(=O)N(CC)CC	Mol_1788
	C1COCCN1CCNC(=O)CSc(n2N)nnc2-c3c(OC)cccc3	Mol_1789
	O1CCOc(c12)ccc(c2)NC(=O)CSc(n3N)nnc3-c4cc(OC)c(cc4)OC	Mol_1790
	Cc(c1)ccc(c1C)NC(=O)NC(=O)CSc(n2N)nnc2-c3ccc(cc3)OC(F)F	Mol_1791
	C1CCCCN1c(cc2)ccc2NC(=O)CSc(n3N)nnc3-c4cc(OC)c(OC)c(c4)OC	Mol_1792
	c1cc(S(=O)(=O)N)ccc1NC(=O)CSc(n2N)nnc2-c3c(OC(C)C)cccc3	Mol_1793
	CC(=O)Nc(c1)ccc(OC)c1NC(=O)CSc(n2N)nnc2-c(cc3)ccc3C(C)C	Mol_1794
	c1cc(Cl)cc(Cl)c1C(O)(Cn2cncn2)CSc(n3N)nnc3-c4cc(Cl)ccc4	Mol_1795
	O1CCCC1CNC(=O)C(C)Sc(n2N)nnc2-c(cc3)ccc3C(=O)O	Mol_1796
	CC(C)OC(=O)CSc(n1N)nnc1-c(c2)cc(OC)c(OC)c2-c3ccc(Cl)cc3	Mol_1797
	CCCc1c(C)cc(cc1)NC(=O)CSc(n2N)nnc2-c3cc(OC)c(cc3)OC	Mol_1798
	O=S1(=O)CC(CC1)NC(=O)CSc(n2N)nnc2-c3cc(OC)c(cc3)OC	Mol_1799
	Cc1cc(c(cc1)OC)NC(=O)CSc(n2N)nnc2-c3ccc(cc3)OC(C)C	Mol_1800
	c1ccccc1/C=C/C(c2ccccc2)=C/CSc(n3N)nnc3-c4c(Cl)cccc4	Mol_1801
	C1CCCCC1NC(=O)CSc(n2N)nnc2-c3c(Cl)cccc3Cl	Mol_1802
	COc(cc1)ccc1-c2nnc(n2N)Sc3ccc(Cl)cc3	Mol_1803
	CC(=O)Sc(n1N)nnc1-c2c(OC)cccc2	Mol_1804
	c1ccccc1C(c2ccccc2)Sc(n3N)nnc3-c4c(Cl)c(Cl)ccc4	Mol_1805
	O=c1[nH]c(=O)n(CC(C)C)c(N)c1N(CCOC)C(=O)CSc(n2N)nnc2-c3cc(Cl)ccc3	Mol_1806
	O=c1[nH]c(=O)n(CC(C)C)c(N)c1N(CCOC)C(=O)CSc(n2N)nnc2-c3cc(F)ccc3	Mol_1807
	CCCCn(c(=O)[nH]c1=O)c(N)c1N(CCOC)C(=O)CSc(n2N)nnc2-c(cc3)ccc3C(F)(F)F	Mol_1808
	c1cccc(F)c1C(O)(Cn2cncn2)CSc(n3N)nnc3-c4ccc(cc4)OC(F)F	Mol_1809
	C1S(=O)CCC1N(CC)C(=O)CSc(n2N)nnc2-c3ccc(cc3)OC(F)F	Mol_1810
	C1CCCCC1CCNC(=O)CSc(n2N)nnc2-c3cc(ccc3)S(=O)(=O)N(CC)CC	Mol_1811
	c1ccc(OC)c(c1C)NC(=O)CSc(n2N)nnc2-c3cc(ccc3)S(=O)(=O)N(CC)CC	Mol_1812
	C1CCCCC(C1C)NC(=O)CSc(n2N)nnc2-c3cc(ccc3)S(=O)(=O)N(CC)CC	Mol_1813
	O=C1CSC(=O)N1CCNC(=O)CSc(n2N)nnc2-c3ccc(cc3)OCC(F)(F)F	Mol_1814
	c1ccc(Cl)cc1CCNC(=O)NC(=O)CSc(n2N)nnc2-c3cc(OC)c(OC)c(c3)OC	Mol_1815
	c1ccccc1CCNC(=O)CSc(n2N)nnc2-c3c(Cl)cc(Cl)c(F)c3	Mol_1816
	O1COc(c12)ccc(c2)NC(=O)CSc(n3N)nnc3-c4ccc(Cl)cc4	Mol_1817
	COc1c(OC)cc(cc1OC)NC(=O)CSc(n2N)nnc2-c(cc3C)cc(c3)OC	Mol_1818
	c1ccccc1NC(=O)NC(=O)CSc(n2N)nnc2-c3c(Cl)cc(Cl)c(F)c3	Mol_1819
	Cc1cc(no1)NC(=O)CSc(n2N)nnc2-c3cc(Cl)c(F)cc3	Mol_1820
	COC(=O)C(C)Sc(n1N)nnc1-c2cc(ccc2)S(=O)(=O)N(CC)CC	Mol_1821
	Cc1cc(on1)NC(=O)CSc(n2N)nnc2-c3cc(OC)c(OC)c(c3)OC	Mol_1822
	FC(F)(F)COc(cc1)ccc1-c2nnc(n2N)SCc3c(Cl)c(F)cc(F)c3	Mol_1823
	Cc1cc(c(cc1)OC)NC(=O)CSc(n2N)nnc2-c3c(O)cccc3	Mol_1824
	COc1c(OC)ccc(c1)NC(=O)CSc(n2N)nnc2-c3c(F)cccc3	Mol_1825
	c1occc1CNC(=O)CSc(n2N)nnc2-c3c(OC)cccc3	Mol_1826
	c1ccc(Cl)cc1CSc(n2N)nnc2-c3c(F)cccc3	Mol_1827
	c1ccccc1Cn(c(=O)[nH]c2=O)c(N)c2N(CCOC)C(=O)CSc(n3N)nnc3-c4cc(Cl)c(cc4)OC(C)C	Mol_1828
	O=c1[nH]c(=O)n(CC(C)C)c(N)c1N(CCOC)C(=O)CSc(n2N)nnc2-c3ccc(Cl)cc3	Mol_1829
	O1CCCC1CCNC(=O)N(CC)C(=O)CSc(n2N)nnc2-c(cc3)ccc3C(F)(F)F	Mol_1830
	Cc1ccc(cc1)-c2nnc(n2N)SCC(=O)Nc3c(Cl)ccc(c3)S(=O)(=O)N(C4)CCCC4C	Mol_1831
	O=c1[nH]c(=O)n(CC(C)C)c(N)c1N(CCOC)C(=O)CSc(n2N)nnc2-c3ccc(cc3)OC	Mol_1832
	c1ccccc1Cn(c(=O)[nH]c2=O)c(N)c2C(C)Sc(n3N)nnc3-c4c(Cl)c(Cl)ccc4	Mol_1833
	C1CCCCC1NC(=O)CSc(n2N)nnc2-c3c(cccc3)S(=O)(=O)N(CC)CC	Mol_1834
	O1CCOc(c12)ccc(c2)NC(=O)CSc(n3N)nnc3-c4cc(OC)c(OC)c(c4)OC	Mol_1835
	O=S1(=O)CC(CC1)N(CC)C(=O)CSc(n2N)nnc2-c(cc3)ccc3C(F)(F)F	Mol_1836
	C1COCCN1c(cc2)ccc2NC(=O)CSc(n3N)nnc3-c4c(OC)cccc4	Mol_1837
	O1CCCC1CNC(=O)CSc(n2N)nnc2-c3c(OC)cccc3	Mol_1838
	O1CCCC1CNC(=O)CSc(n2N)nnc2-c3cc(OC)c(OC)c(c3)OC	Mol_1839
	COc(cc1)c(OC)cc1CCN(C(C)C)C(=O)CSc(n2N)nnc2-c3cc(OC)c(OC)c(c3)OC	Mol_1840
	CC(C)Oc(cc1)ccc1-c2nnc(n2N)SCc(n3)c(=O)[nH]c(c34)ccc(C)c4	Mol_1841
	Fc1c(Cl)cc(cc1)N(C)C(=O)CSc(n2N)nnc2-c3cc(OC)c(OC)c(c3)OC	Mol_1842
	CC(=O)Nc(c1)ccc(OC)c1NC(=O)CSc(n2N)nnc2-c3ccccn3	Mol_1843
	C1CCCCCC1NC(=O)CSc(n2N)nnc2-c3c(cccc3)S(=O)(=O)N(CC)CC	Mol_1844
	CC1CCCN(C1)c(cc2)ccc2C(=O)CSc(n3N)nnc3-c4ccc(cc4)OC	Mol_1845
	C1CCCC1CNC(=O)CSc(n2N)nnc2-c3c(F)cccc3	Mol_1846
	c1cc(Cl)cc(Cl)c1NC(=O)CSc(n2N)nnc2-c3c(Cl)cccc3	Mol_1847
	CC(C)CNC(=O)CSc(n1N)nnc1-c2c(Cl)c(Cl)ccc2	Mol_1848
	c1cccc(Cl)c1NC(=O)CSc(n2N)nnc2-c3c(Cl)cc(Cl)cc3	Mol_1849
	C1CCC1CNC(=O)CSc(n2N)nnc2-c3c(Cl)cccc3	Mol_1850
	O=C(O)CSc(n1N)nnc1-c2c(Cl)cc(Cl)c(F)c2	Mol_1851
	c1ccccc1C(c2ccccc2)Sc(n3N)nnc3-c4c(Cl)cc(Cl)cc4	Mol_1852
	N#CCSc(n1N)nnc1-c2c(Cl)cc(Cl)cc2	Mol_1853
	O1COc(c12)ccc(c2)Cn(c(C)c3)c(C)c3C(=O)CSc(n4N)nnc4-c(cc5)ccc5C(F)F	Mol_1854
	O1CCOc(c12)ccc(c2)NC(=O)CSc(n3N)nnc3-c4cc(ccc4)S(=O)(=O)N(CC)CC	Mol_1855
	Cc1ccc(cc1)S(=O)(=O)N(c2c(OC)cc(cc2)OC)C(=O)CSc(n3N)nnc3-c4cc(OC)c(OC)c(c4)OC	Mol_1856
	C1CCCC=C1CCN(SC)C(=O)CSc(n2N)nnc2-c3cc(c(cc3)OC)OCC	Mol_1857
	C1CCCC(C1C)NC(=O)CSc(n2N)nnc2-c3cc(OC)c(OC)c(c3)OC	Mol_1858
	s1cccc1CNC(=O)CSc(n2N)nnc2-c3c(OC)cccc3	Mol_1859
	C1CCCC(C1C)NC(=O)CSc(n2N)nnc2-c3c(OC)cccc3	Mol_1860
	c1cc(F)c(Cl)cc1C(=O)CSc(n2N)nnc2-c3ccc(cc3)OC(F)F	Mol_1861
	COc(cc1)ccc1NC(=O)NC(=O)CSc(n2N)nnc2-c3c(F)cccc3	Mol_1862
	CCc1ccc(cc1)NC(=O)CSc(n2N)nnc2-c3cc(F)cc(Cl)c3	Mol_1863
	c1cc(Cl)ccc1C(=O)NNC(=O)CSc(n2N)nnc2-c3c(OC)cccc3	Mol_1864
	o1cccc1CNC(=O)CSc(n2N)nnc2-c3c(OC)cccc3	Mol_1865
	CC(C)CCNC(=O)NC(=O)NC(=O)CSc(n1N)nnc1-c2c(F)cccc2	Mol_1866
	c1ccccc1CCN(c2ccc(F)cc2)C(=O)CSc(n3N)nnc3-c4c(F)cccc4	Mol_1867
	O=S1(=O)CC(CC1)N(C)C(=O)CSc(n2N)nnc2-c3c(O)cccc3	Mol_1868
	CC(C)Oc(cc1)ccc1-c2nnc(n2N)SCc(n3)[nH]c(c34)ccc(C)c4	Mol_1869
	COc1c(OC)cc(cc1OC)NC(=O)CSc(n2N)nnc2-c3c(F)cccc3	Mol_1870
	C1CCCC1NC(=O)NC(=O)NC(=O)CSc(n2N)nnc2-c3c(F)cccc3	Mol_1871
	c1cccc(c1C#N)-c2nnc(n2N)SCC(=O)Nc(n3)[nH]c(c34)cccc4	Mol_1872
	C=CC(C)NC(=O)NC(=O)CSc(n1N)nnc1-c2c(F)cccc2	Mol_1873
	O=c1n(C)c(=O)n(C)c(N)c1C(=O)CSc(n2N)nnc2-c3c(F)cc(F)cc3	Mol_1874
	FCCNC(=O)CN(C)C(=O)CSc(n1N)nnc1-c2c(F)cccc2	Mol_1875
	Cc1ccc(c(C)c1C)NC(=O)NC(=O)CSc(n2N)nnc2-c3c(F)cccc3	Mol_1876
	Cc1c(C)ccc(c1)NC(=O)NC(=O)CSc(n2N)nnc2-c3c(F)cccc3	Mol_1877
	Cc(c1)cnc(c1C)NC(=O)CSc(n2N)nnc2-c3c(Cl)cc(Cl)c(F)c3	Mol_1878
	CCN(C1)CCn(c12)c(nn2)CSc(n3N)nnc3-c4c(OCC)cccc4	Mol_1879
	C1COCCN1CCNC(=O)CSc(n2N)nnc2-c3c(Cl)cccc3	Mol_1880
	c1ccccc1Cn(c(=O)[nH]c2=O)c(N)c2N(CCOC)C(=O)CSc(n3N)nnc3-c4cc(Cl)c(cc4)OC(F)F	Mol_1881
	c1ccccc1CS(=O)(=O)c(n2N)nnc2-c3cc(OC)c(OC)c(c3)OC	Mol_1882
	c1ccccc1Cn(c(=O)[nH]c2=O)c(N)c2N(CCOC)C(=O)CSc(n3N)nnc3-c4c(F)cccc4	Mol_1883
	C1CCCCC1NC(=O)Sc(n2N)nnc2-c3ccc(Cl)cc3	Mol_1884
	c1cccc(c12)[nH]c(n2)CSc(n3N)nnc3-c4c(O)cccc4	Mol_1885
	O=c1[nH]c(=O)n(CC(C)C)c(N)c1N(CCOC)C(=O)CSc(n2N)nnc2-c(cc3)ccc3C(C)(C)C	Mol_1886
	CCOc(cc1)ccc1/C=N/n2c(SC)nnc2-c3ccccc3	Mol_1887
	COc(cc1)c(OC)cc1/C=C/Sc(n2N)nnc2-c3cc(OC)c(OC)c(c3)OC	Mol_1888
	c1ccccc1Cn(c(=O)[nH]c2=O)c(N)c2N(CC)C(=O)CSc(n3N)nnc3-c4c(Cl)ccc(F)c4	Mol_1889
	o1cccc1CNC(=O)NC(=O)CSc(n2N)nnc2-c3ccc(cc3)OC(F)F	Mol_1890
	O1CCCC1CNC(=O)CSc(n2N)nnc2-c3ccc(cc3)OC(F)F	Mol_1891
	C1CCCCN1c(cc2)ccc2N(C(C)C)C(=O)CSc(n3N)nnc3-c4cc(OC)cc(c4)OC	Mol_1892
	CCC(C)NC(=O)CN(CCC)C(=O)CSc(n1N)nnc1-c2c(F)cccc2	Mol_1893
	CNC(=O)NC(=O)CN(CC(C)C)C(=O)CSc(n1N)nnc1-c2c(F)cccc2	Mol_1894
	O1CCOc(c12)ccc(c2)NC(=O)CSc(n3N)nnc3-c4c(OCC)cccc4	Mol_1895
	c1cc(C)ccc1CCNC(=O)c2ccc(cc2)CSc(n3N)nnc3-c4cc(OC)c(OC)c(c4)OC	Mol_1896
	c1ccnc(c12)ccc(c2)NC(=O)CSc(n3N)nnc3-c4c(OC)cccc4	Mol_1897
	O1COc(c12)ccc(c2)NC(=O)CSc(n3N)nnc3-c4c(OCC)cccc4	Mol_1898
	O1CCOc(c12)ccc(c2)NC(=O)CSc(n3N)nnc3-c(c4C(=O)OC)cccc4	Mol_1899
	C1SCc(c12)sc(n2)NC(=O)CSc(n3N)nnc3-c4c(OC)cccc4	Mol_1900
	o1nc(N)c(c1C)N(CC(C)C)C(=O)CSc(n2N)nnc2-c3ccc(cc3)OC	Mol_1901
	c1cccc(OC)c1-n2c(SC)nnc2-c3ccccc3	Mol_1902
	CC(C)C(OC1)CC(C)=C1CCNC(=O)CSc(n2N)nnc2-c3cc(ccc3)S(=O)(=O)N(CC)CC	Mol_1903
	CCCCn(c(=O)[nH]c1=O)c(N)c1N(CCOC)C(=O)CSc(n2N)nnc2-c3ccc(cc3)OC(F)F	Mol_1904
	c1c(Cl)c(Cl)cc(Cl)c1NC(=O)CSc(n2N)nnc2-c3c(F)cccc3	Mol_1905
	c1c(F)c(Cl)cc(Cl)c1-c2nnc(n2N)Sc(c3[N+]([O-])=O)ccc(c3)[N+]([O-])=O	Mol_1906
	CCC(C)NC(=O)CSc(n1N)nnc1-c2c(Cl)ccc(Cl)c2	Mol_1907
	c1cccc(Cl)c1NC(=O)CSc(n2N)nnc2-c3c(Cl)cc(Cl)c(F)c3	Mol_1908
	FC(F)Oc(cc1)ccc1-c2nnc(n2N)SCc3c(Cl)ccc(F)c3	Mol_1909
	c1ccc(C)c(c1C)NC(=O)CSc(n2N)nnc2-c3c(Cl)cc(Cl)cc3	Mol_1910
	c1cccc(F)c1NC(=O)CSc(n2N)nnc2-c3c(Cl)cc(Cl)c(Cl)c3	Mol_1911
	c1cccc(c12)n(N)c(n2)SCC(=O)NNC(=O)CSc(n3N)nnc3-c4c(F)cccc4	Mol_1912
	c1cccc(F)c1NC(=O)CSc(n2N)nnc2-c3c(Cl)cc(Cl)c(F)c3	Mol_1913
	O=c1[nH]c(=O)n(CC(C)C)c(N)c1N(CC)C(=O)CSc(n2N)nnc2-c3c(Cl)cccc3	Mol_1914
	COc(cc1)ccc1-c2nnc(n2N)SCC(=O)Nc3c(Cl)ccc(c3)S(=O)(=O)N4CCCCC4	Mol_1915
	O=c1[nH]c(=O)n(CC(C)C)c(N)c1N(CC)C(=O)CSc(n2N)nnc2-c3c(F)cccc3	Mol_1916
	c1ccnc(c12)SCCC2NC(=O)CSc(n3N)nnc3-c4c(OC)cccc4	Mol_1917
	COc(cc1)ccc1-c2nnc(n2N)SCC(=O)Nc3c(Cl)ccc(c3)S(=O)(=O)N4CCCCCC4	Mol_1918
	C1COCCN1S(=O)(=O)c(cc2)ccc2NC(=O)CSc(n3N)nnc3-c4c(OCC)cccc4	Mol_1919
	O1COc(c12)ccc(c2)Cn(c(C)c3)c(C)c3C(=O)CSc(n4N)nnc4-c5c(F)cccc5	Mol_1920
	O=S1(=O)CC(CC1)NC(=O)CSc(n2N)nnc2-c3cc(ccc3)S(=O)(=O)N(CC)CC	Mol_1921
	ClC(Cl)(Cl)c1ccc(cc1)CSc(n2N)nnc2-c3c(Cl)cccc3Cl	Mol_1922
	C=C(C)CSc(n1N)nnc1-c2c(Cl)ccc(Cl)c2	Mol_1923
	C=C(C)CSc(n1N)nnc1-c2c(Cl)cc(Cl)cc2	Mol_1924
	C1COCCN1c(cc2)ccc2NC(=O)CSc(n3N)nnc3-c4c(F)cccc4	Mol_1925
	Cc(c1)ccc(c1C)NC(=O)CSc(n2N)nnc2-c3cc(F)c(Cl)c(Cl)c3	Mol_1926
	Cc(c1)ccc(c1C)NC(=O)NC(=O)CSc(n2N)nnc2-c3c(F)cccc3	Mol_1927
	c1c(Cl)ccc(Cl)c1NC(=O)CSc(n2N)nnc2-c3c(OC)cccc3	Mol_1928
	FC(F)Oc(cc1)ccc1N(C)C(=O)CSc(n2N)nnc2-c3c(F)cccc3	Mol_1929
	c1cc(Cl)cc(Cl)c1C(O)(Cn2cncn2)CSc(n3N)nnc3-c4ccc(Cl)cc4	Mol_1930
	O1CCCC1CNC(=O)CSc(n2N)nnc2-c3c(F)cccc3	Mol_1931
	c1cccc(OC)c1NC(=O)NC(=O)CSc(n2N)nnc2-c3c(F)cccc3	Mol_1932
	c1cccc(OC)c1-c2nnc(n2N)SCC(=O)Nc3cccc(c34)c5c(C4=O)cccc5	Mol_1933
	c1cccc(OC)c1NC(=O)CSc(n2N)nnc2-c3c(Cl)cc(Cl)cc3	Mol_1934
	COc(c1)ccc(c1C)NC(=O)CSc(n2N)nnc2-c3c(F)cccc3	Mol_1935
	O=c1[nH]c(=O)n(CC(C)C)c(N)c1N(CCOC)C(=O)CSc(n2N)nnc2-c3ccc(cc3)OC(C)C	Mol_1936
	Cc1onc(C)c1CSc(n2N)nnc2-c3c(N)ccnc3	Mol_1937
	c1cccc(c12)[nH]c(n2)CSc(n3N)nnc3-c4c(Cl)cccc4	Mol_1938
	CCOc(cc1)c(OCC)cc1/C=N/n2c(SC)nnc2-c3ccccc3	Mol_1939
	c1cccc(c12)[nH]c(n2)CSc(n3N)nnc3-c4c(F)cccc4	Mol_1940
	FC(F)Oc(cc1)ccc1-c2nnc(n2N)Sc3ccc(S(=O)(=O)Cl)cc3	Mol_1941
	c1cccc(c1c23)n(CC)c2ccc(c3)NC(=O)CSc(n4N)nnc4-c5c(OC)cccc5	Mol_1942
	O=C1CSC(=O)N1CCNC(=O)CSc(n2N)nnc2-c3ccc(cc3)OC(F)F	Mol_1943
	O=S1(=O)CC(CC1)N(C)C(=O)CSc(n2N)nnc2-c3ccc(cc3)OC(F)F	Mol_1944
	O=S(=O)(Cl)c(c1)ccc(N)c1NC(=O)CSc(n2N)nnc2-c3c(OC)cccc3	Mol_1945
	C1CCCN1S(=O)(=O)c(cc2)ccc2NC(=O)CSc(n3N)nnc3-c4c(OC)cccc4	Mol_1946
	C1CN(C)c(c12)c(ccc2)NC(=O)CSc(n3N)nnc3-c4c(OC)cccc4	Mol_1947
	c1cccc(N)c1NC(=O)CSc(n2N)nnc2-c3c(Cl)cc(Cl)c(F)c3	Mol_1948
	c1cccc(O)c1NC(=O)CSc(n2N)nnc2-c3c(Cl)cc(Cl)c(F)c3	Mol_1949
	c1cccc(c12)ccc(c2)C(C(=O)O)Sc(n3N)nnc3-c4c(Cl)cc(Cl)cc4	Mol_1950
	c1cccc(OC)c1-c2nnc(n2N)SCC(=O)Nc(cc3)cc(c34)OCCOc5c(N4C)cccc5	Mol_1951
	COc(cc1)c(OC)cc1-c2nnc(n2N)SCC(=O)Nc3c(Cl)ccc(c3)S(=O)(=O)N4CCCCC4	Mol_1952
	c1c(Cl)ccc(Cl)c1NC(=O)CSc(n2N)nnc2-c3c(F)cccc3	Mol_1953
	c1cccc(F)c1-c2nnc(n2N)SCC(=O)Nc3cccc(c34)c5ccc(c(c4=O)ccc5)-c6ccc(Cl)cc6	Mol_1954
	COc(cc1)c(OC)cc1-c(n2N)nnc2CSc(n3-c4cc(OC)ccc4)nnc3-c5cc(OC)c(cc5)OC	Mol_1955
	COc(cc1)c(OC)cc1CCNC(=O)CSc(n2N)nnc2-c3cc(ccc3)S(=O)(=O)N(CC)CC	Mol_1956
	CC(C)Sc(n1N)nnc1-c2cc(OC)c(OC)c(c2)OC	Mol_1957
	Clc1cccc(c1Cl)NC(=O)CSc(n2N)nnc2-c3c(F)cccc3	Mol_1958
	c1ccccc1/C=N/n2c(SCCc3ccccc3)nnc2-c4cc(OC)c(OC)c(c4)OC	Mol_1959
	O=c1[nH]c(=O)n(CC(C)C)c(N)c1N(CC)C(=O)CSc(n2N)nnc2-c3cc(OC)c(OC)c(c3)OC	Mol_1960
	c1cccc(c12)[nH]c(n2)NC(=O)CSc(n3N)nnc3-c4c(O)cccc4	Mol_1961
	CCCCn(c(=O)[nH]c1=O)c(N)c1N(CCOC)C(=O)CSc(n2N)nnc2-c3c(F)cccc3	Mol_1962
	O=c1[nH]c(=O)n(C(C)C)c(N)c1N(CCOC)C(=O)CSc(n2N)nnc2-c3cc(Cl)ccc3	Mol_1963
	FC(F)Oc(cc1)ccc1-c2nnc(n2N)SCC(=O)Nc3ccc(cc3)N(CO4)CCOC4(c5ccccc5)c6ccccc6	Mol_1964
	c1cccc(F)c1-c2nnc(n2N)SCC(=O)Nc(c3C)nc(nc3)Nc4ccc(cc4)N5CCOCC5	Mol_1965
	O=S1(=O)CC(CC1)N(C)C(=O)CSc(n2N)nnc2-c3c(Cl)cccc3	Mol_1966
	O=S1(=O)CC(CC1)N(C)C(=O)CSc(n2N)nnc2-c3c(F)cccc3	Mol_1967
	c1cc(Cl)cc(Cl)c1NC(=O)CSc(n2N)nnc2-c3ccc(cc3)OC(F)F	Mol_1968
	c1ccccc1C(O)(Cn2cncn2)CSc(n3N)nnc3-c4c(Cl)cc(Cl)cc4	Mol_1969
	n1oc(C)c(c1C)NC(=O)NC(=O)CSc(n2N)nnc2-c3c(F)cccc3	Mol_1970
	Cc1cc(no1)NC(=O)CSc(n2N)nnc2-c3c(O)c(ccc3)OCC	Mol_1971
	c1cccc(c12)[nH]cc2C(=O)C(C(=O)N)Sc(n3N)nnc3-c4ccc(cc4)OC	Mol_1972
	CC(=O)Nc(c1)ccc(OC)c1NC(=O)CSc(n2N)nnc2-c3cc(F)cc(F)c3	Mol_1973
	c1cccc(c12)N(CCC2)C(=O)CSc(n3N)nnc3-c4c(N)nc(C)cc4	Mol_1974
	C1CCCCC1NC(=O)CSc(n2N)nnc2-c3c(OC)ccc(Br)c3	Mol_1975
	c1cccc(c12)[nH]c(n2)NC(=O)CSc(n3N)nnc3-c4c(OC)cccc4	Mol_1976
	c1cccc(c12)CCCC2NC(=O)CSc(n3N)nnc3-c4c(F)cccc4	Mol_1977
	CC(C)(C)c1c(C)c(C)cc(c1)NC(=O)CSc(n2N)nnc2-c3c(F)cccc3	Mol_1978
	C=C(C)c1ccc(cc1)NC(=O)NC(=O)CSc(n2N)nnc2-c3c(F)cccc3	Mol_1979
	c1cccc(c12)C(=O)N(C2=O)CCNC(=O)CSc(n3N)nnc3-c4c(Cl)cc(Cl)c(F)c4	Mol_1980
	ClC(Cl)(Cl)c1ccc(cc1)Sc(n2N)nnc2-c3cc(Cl)ccc3	Mol_1981
	c1ccccc1CCSc(nn2)n3NN(CC)c(c4c23)cccc4	Mol_1982
	c1ccc(Cl)cc1CSc(n2N)nnc2-c3c(Cl)cc(Cl)cc3	Mol_1983
	O1CCCC1CNC(=O)C(C)Sc(n2N)nnc2-c3cc(Cl)ccc3	Mol_1984
	O1CCCC1CNC(=O)C(C)Sc(n2N)nnc2-c3cc(F)ccc3	Mol_1985
	c1cc(O)ccc1C(SCC2=O)N2N(C)C(=O)CSc(n3N)nnc3-c(cc4)ccc4C(C)(C)C	Mol_1986
	O=c1n(C)c(=O)n(C)c(N)c1C(=O)CSc(nnc2-c3ccc(F)cc3)n2\N=C\c4ccccc4	Mol_1987
	c1cccc(c12)CCCC2NC(=O)CSc(n3N)nnc3-c4c(OC)cc(OC)c(c4)OC	Mol_1988
	Clc1cc(Cl)cc(c1Cl)NC(=O)CSc(n2N)nnc2-c3ccc(cc3)S(=O)(=O)NC4CC4	Mol_1989
	n1c(O)[nH]c(c12)ccc(c2)NC(=O)CSc(n3N)nnc3-c4c(OCC)cccc4	Mol_1990
	CC(=O)Nc(c1)ccc(OC)c1NC(=O)CSc(n2N)nnc2-c3ccc(cc3)OC(F)F	Mol_1991
	CC(C)(C)c1ccc(cc1)-c2nnc(n2N)[S+]([O-])c(c3C(=O)OC)cccc3	Mol_1992
	CC(C)OC(=O)CSc(n1N)nnc1-c2c(Cl)cc(Cl)cc2	Mol_1993
	CC(C)OC(=O)CSc(n1N)nnc1-c2c(Cl)ccc(Cl)c2	Mol_1994
	O=C(O)c1ccc(cc1)CSc(n2N)nnc2-c3c(Cl)cc(Cl)cc3	Mol_1995
	C1CC1NC(=O)CSc(n2N)nnc2-c(c3C)ccc(C)c3	Mol_1996
	Cc1onc(C)c1CSc(n2N)nnc2-c3c(Cl)c(Cl)ccc3	Mol_1997
	FC(F)Oc(cc1)ccc1-c2nnc(n2N)Sc3ccc(cc3)S(=O)(=O)O	Mol_1998
	CC(C)(C)OC(=O)CSc(n1N)nnc1-c2c(Cl)cc(Cl)cc2	Mol_1999
[truncated: 1,315 more rows]
