# Supplementary material for: Recurrent neural network (RNN) model accelerates the development of antibacterial metronidazole derivatives
Source: PubMed Central journal article supplement — RSC Adv. 2022 Aug 15;12(35):22893–901. doi: 10.1039/d2ra01807a (PMC9377161; doi:10.1039/d2ra01807a), 2022-08-15
Supplement: RA-012-D2RA01807A-s001.pdf [file RA-012-D2RA01807A-s001.pdf]

## **Recurrent Neural Network (RNN) Model Accelerates the Development of Metronidazole Derivatives Antibacterial**

Nannan Chen<sup>1#</sup>, Lijuan Yang<sup>2#</sup>, Guiwen Li<sup>1</sup>, Jiajing Cai<sup>1</sup>, Na Ding<sup>1</sup>, Jie Qin<sup>1\*</sup>,

Yuzhen Niu<sup>1\*</sup>

<sup>1</sup>School of Life Sciences and Medicine, Shandong University of Technology, Zibo,  
255049 Shandong, China;

<sup>2</sup> Institute of modern physics, Chinese Academy of Science, Lanzhou, 730000 Gansu,  
China;

# These authors contributed equally to this work.

\* Corresponding author

Jie, Qin, E-mail: 295722387@qq.com

Yuzhen, Niu, E-mail: niuyzh329@sdut.edu.cn

### ***Bioassay Conditions***

Stock solutions of the synthesized compounds (100 µg/mL) in DMSO were prepared, and graded quantities of the test compounds were incorporated in specified quantity of sterilized liquid MH medium. A specified quantity of the medium containing the test compound was poured into microtitration plates. Suspension of the microorganism was prepared to contain approximately  $10^5$  cfu/mL and applied to microtitration plates with serially diluted compounds in DMSO to be tested and incubated at 37 °C for 24 h. After the MICs were visually determined on each of the microtitration plates, 50 µL of PBS (phosphate buffered saline 0.01 mol/L, pH 7.4,  $\text{Na}_2\text{HPO}_4 \cdot 12\text{H}_2\text{O}$  2.9 g,  $\text{KH}_2\text{PO}_4$  0.2 g, NaCl 8.0 g, KCl 0.2 g, distilled water 1000 mL) containing 2 mg of MTT/mL was added to each well. Incubation was continued at room temperature for 4–5 h. The content of each well was removed, and 100µL of isopropanol containing 5% 1 mol/L HCl was added to extract the dye. After 12 h of incubation at room temperature, the optical density (OD) was measured with a microplate reader at 550 nm.

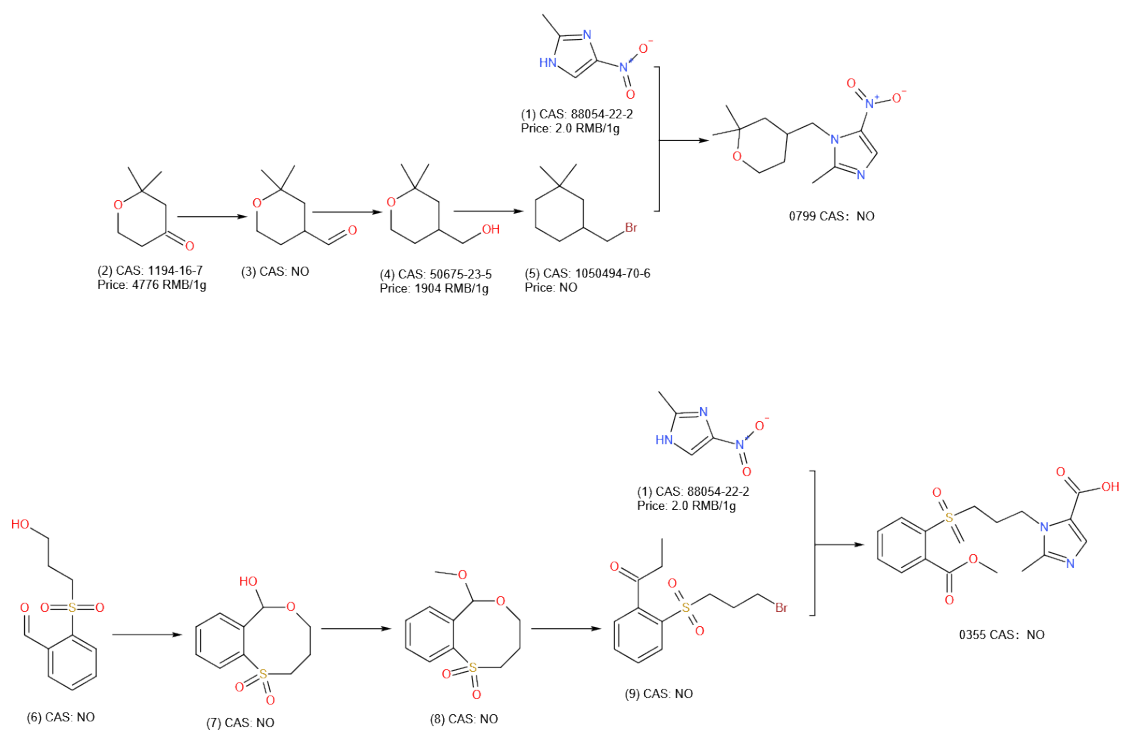

**Fig. S1.** The synthetic routes of 0355 and 0799 predicted by chemical.ai.

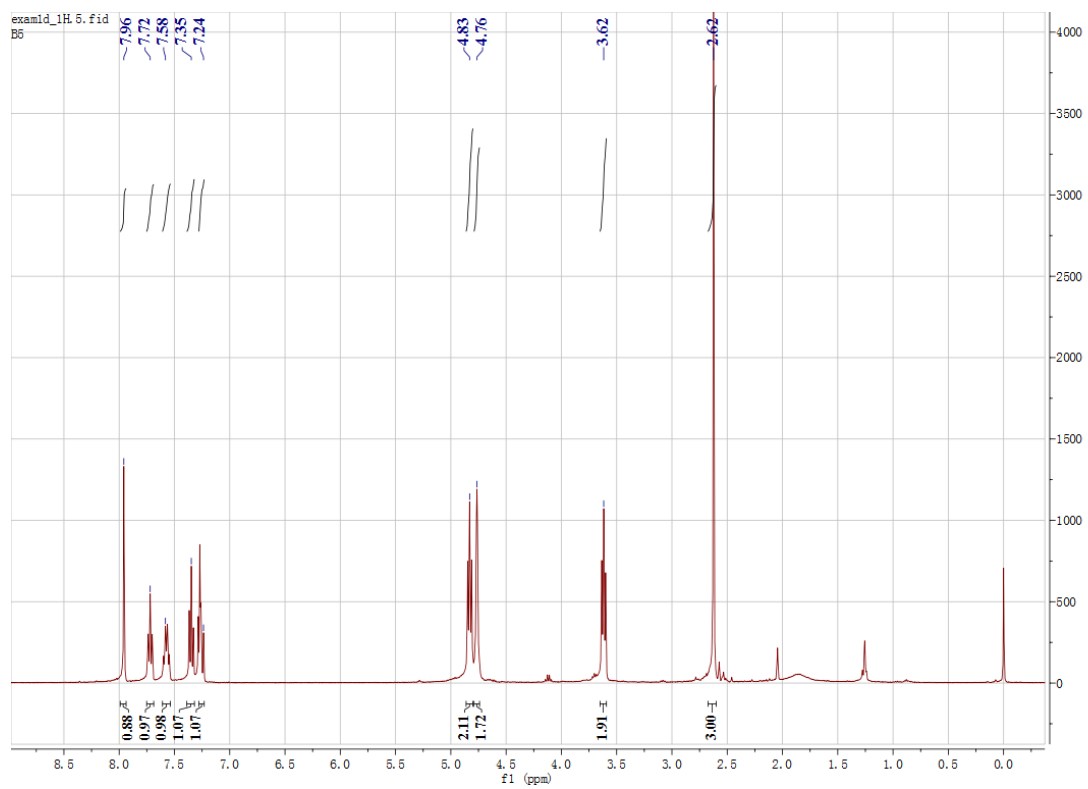

**Fig. S2**  $^1\text{H}$  NMR spectrum of **8a**.

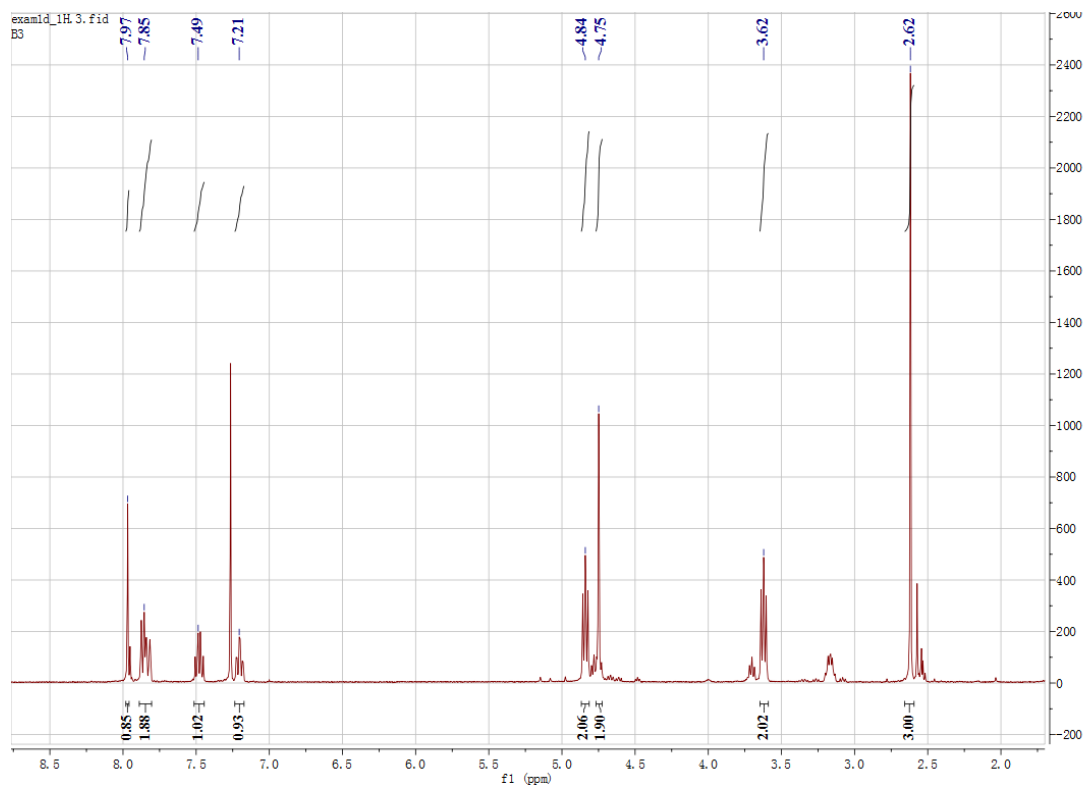

**Fig. S3** <sup>1</sup>H NMR spectrum of **8b**.

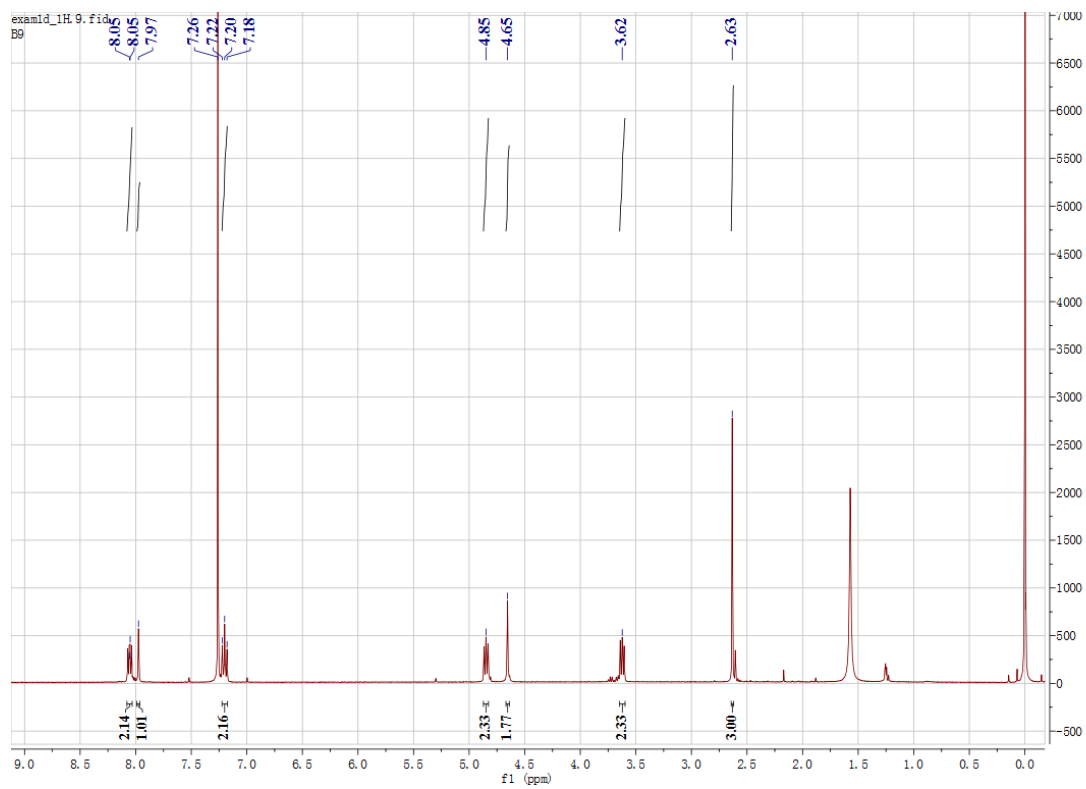

Fig. S4  $^1\text{H}$  NMR spectrum of **8c**.

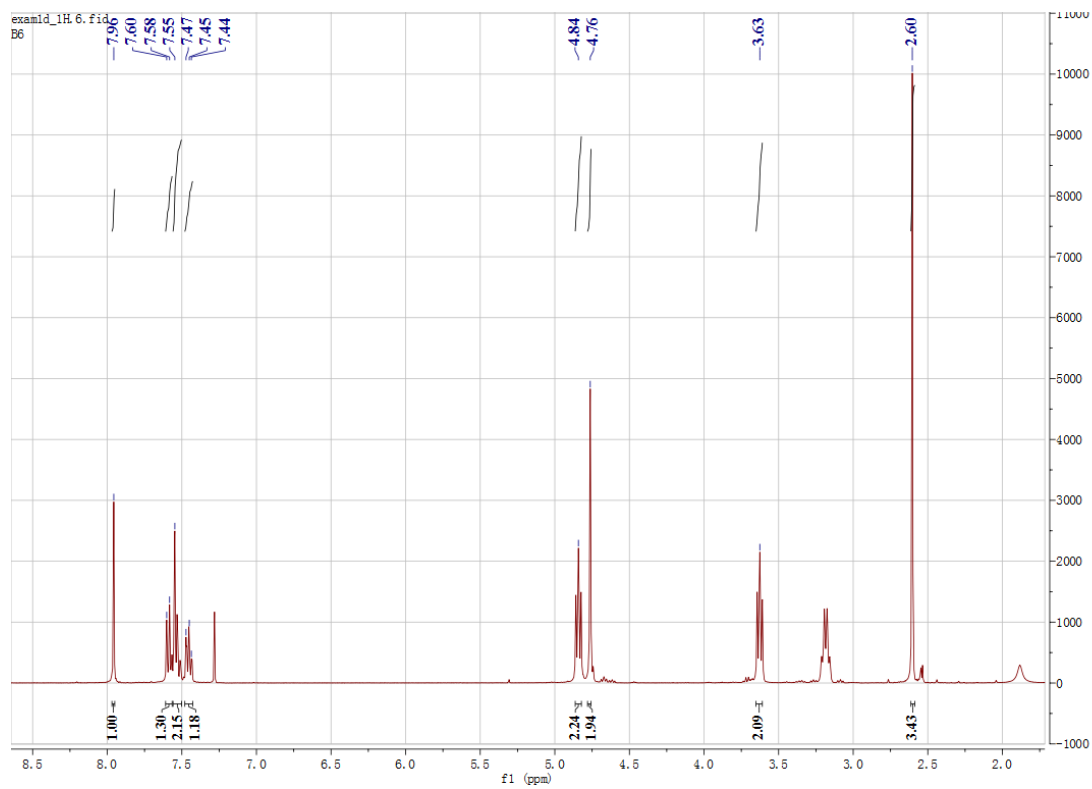

Fig. S5  $^1\text{H}$  NMR spectrum of **8d**.

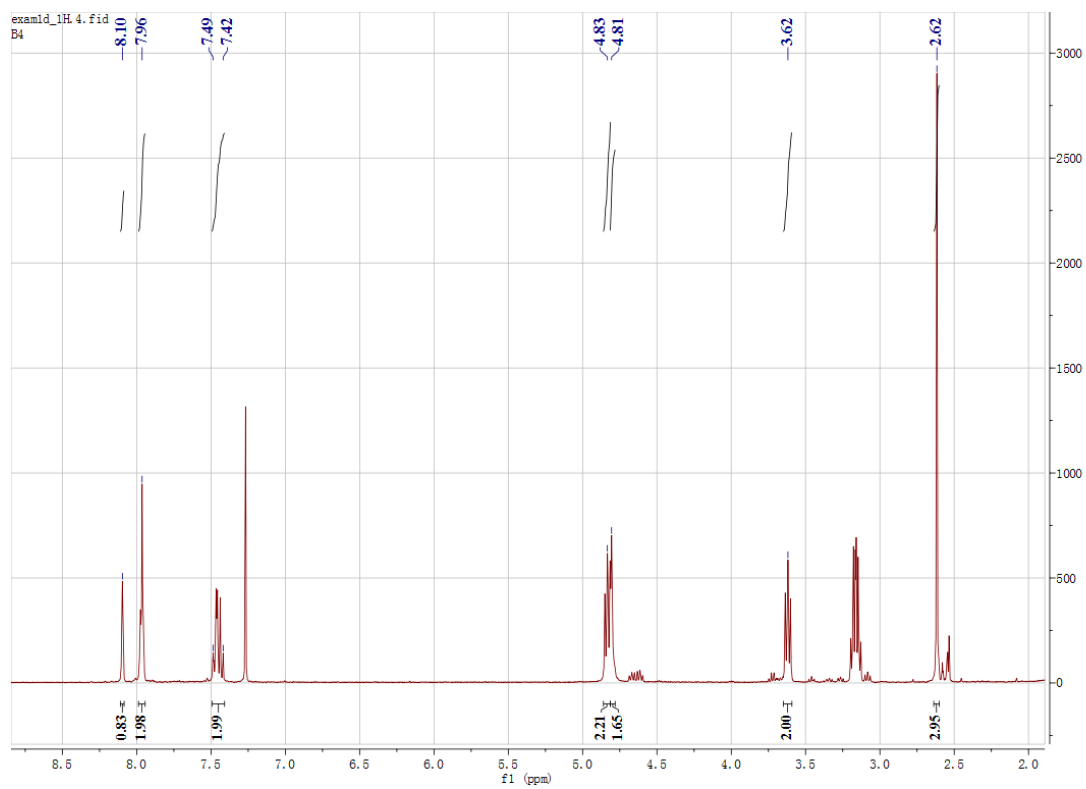

Fig. S6  $^1\text{H}$  NMR spectrum of **8e**.



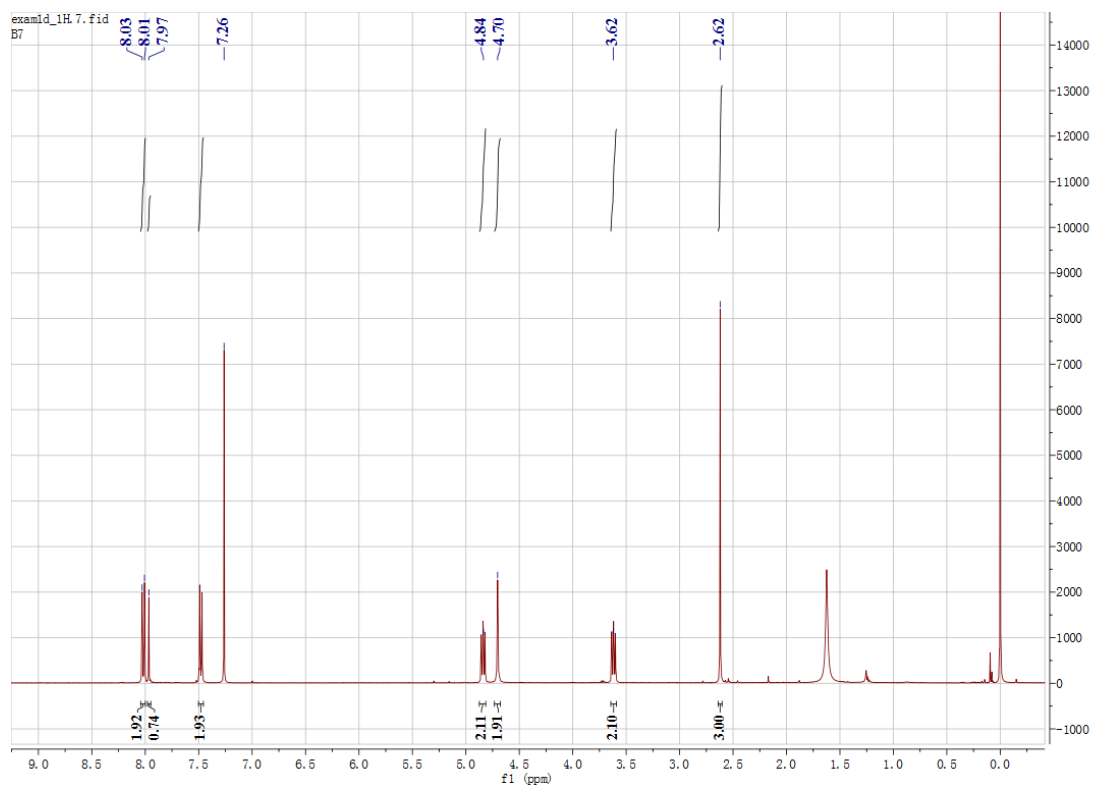

Fig. S7  $^1\text{H}$  NMR spectrum of **8f**.

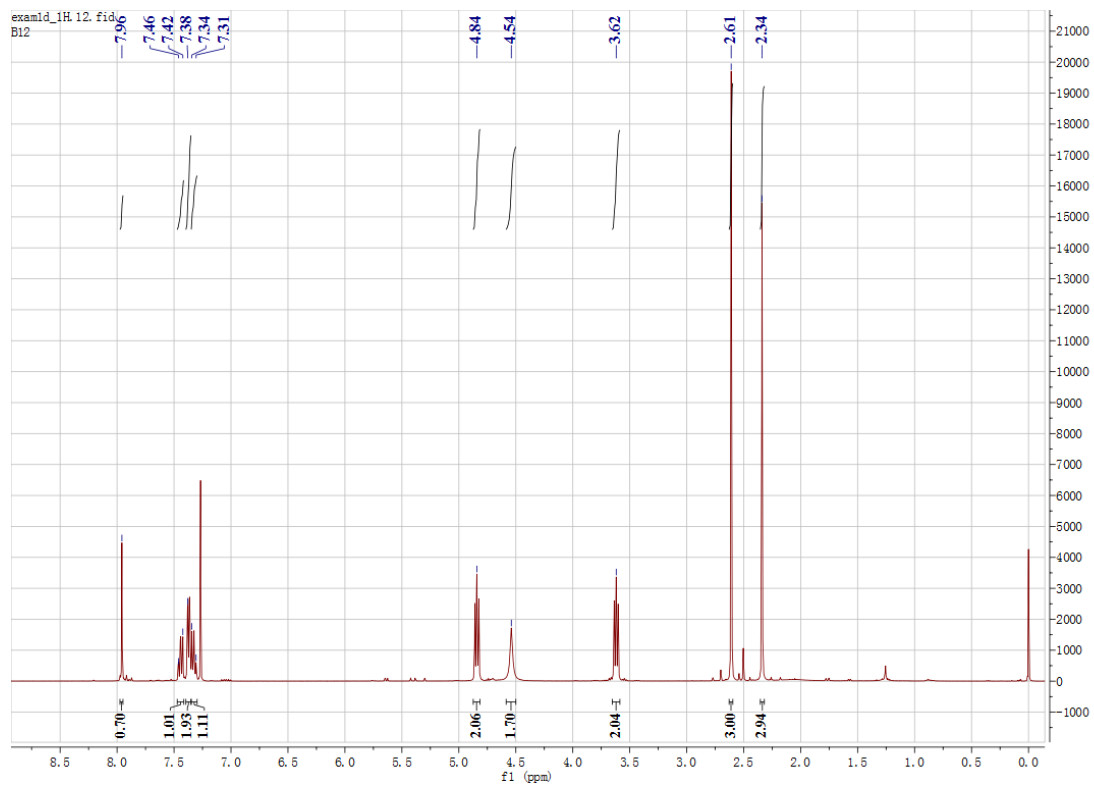

Fig. S8  $^1\text{H}$  NMR spectrum of **8g**.

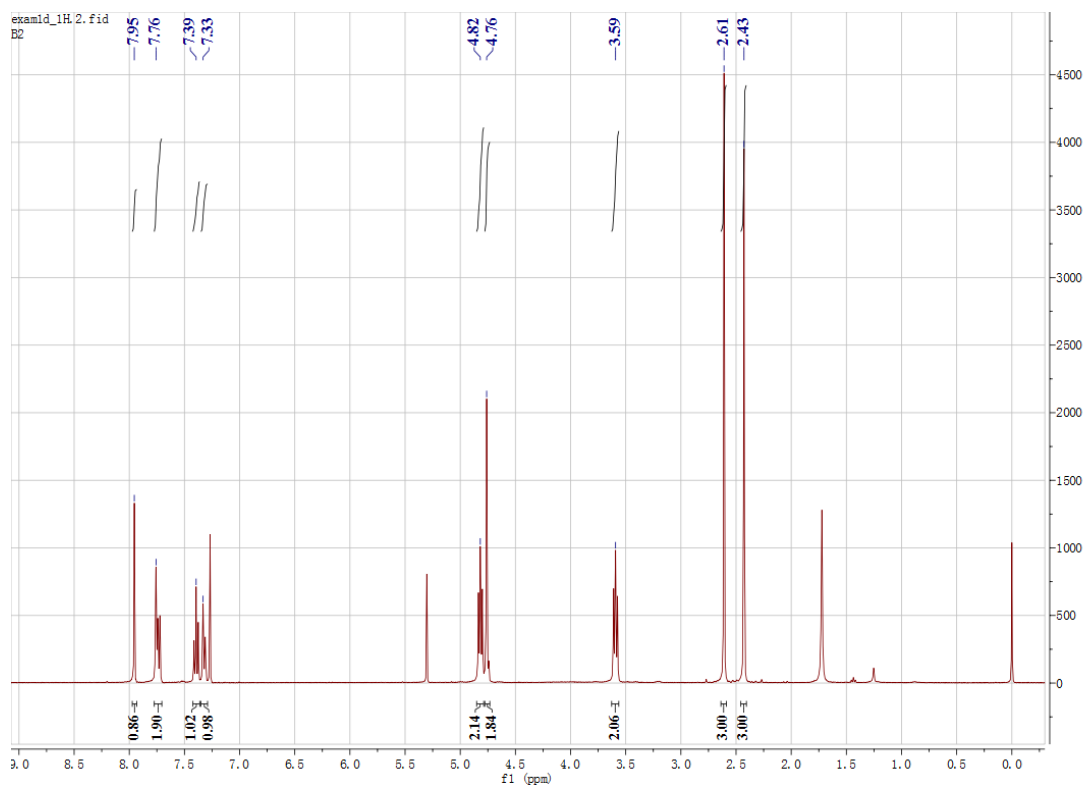

Fig. S9  $^1\text{H}$  NMR spectrum of 8h.

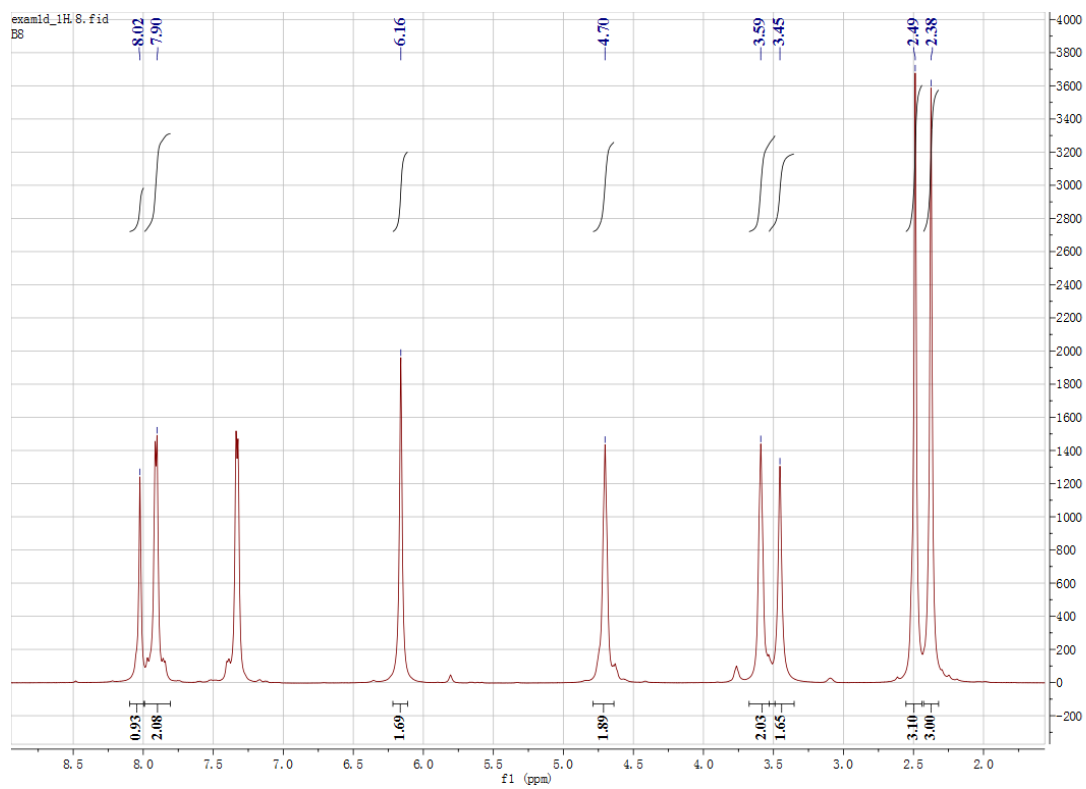

**Fig. S10**  $^1\text{H}$  NMR spectrum of **8i**.

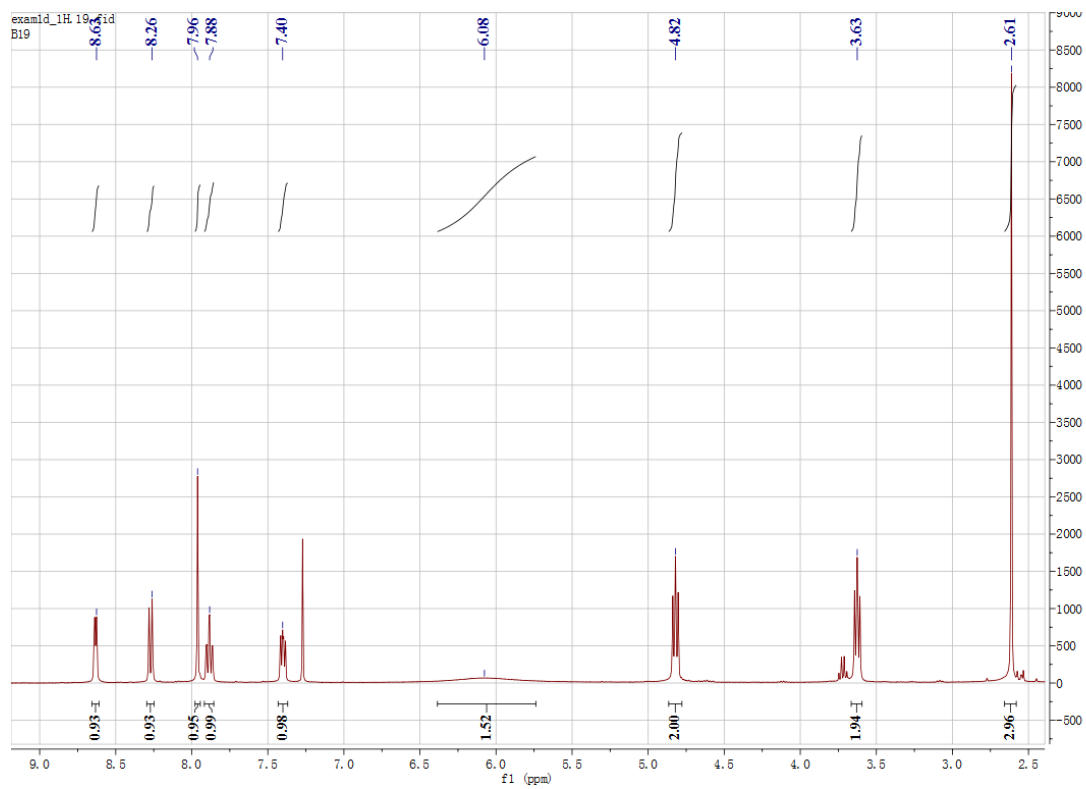

Fig. S11  $^1\text{H}$  NMR spectrum of **8j**.

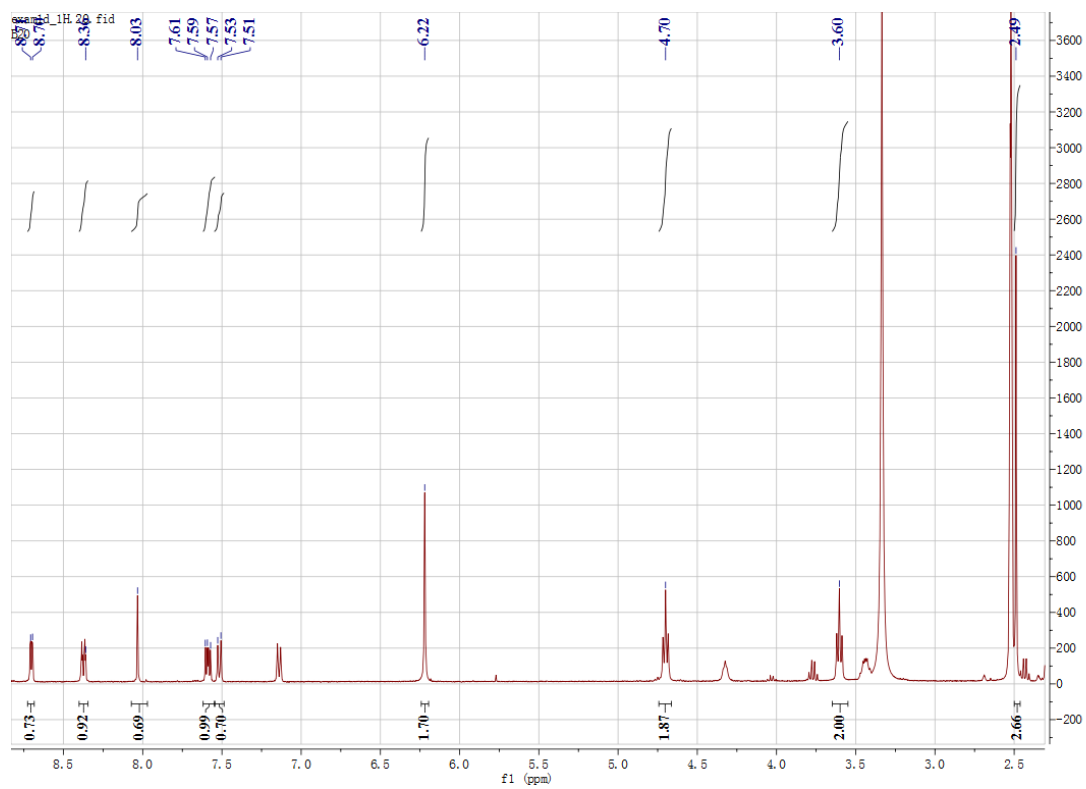

Fig. S12 <sup>1</sup>H NMR spectrum of 8k.

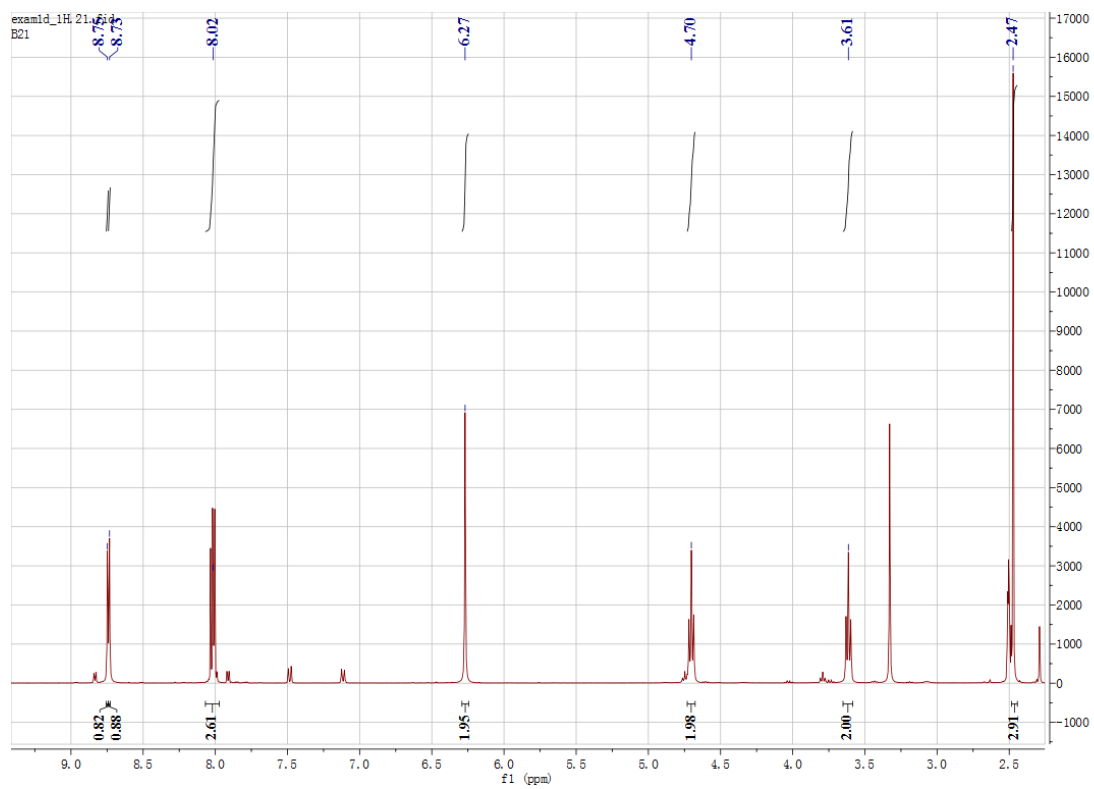

Fig. S13  $^1\text{H}$  NMR spectrum of **8l**.

2#134 RT: 0.30 AV: 1 NL: 4.37E3  
T: ITMS + p ESI Full ms [50.00-500.00]

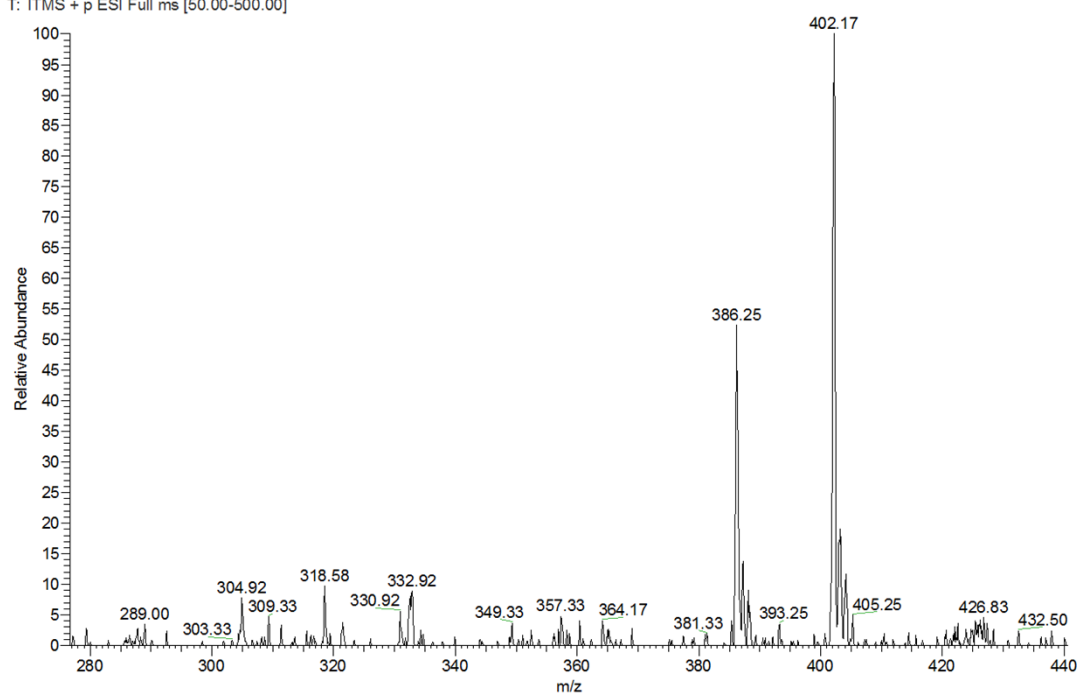

**Fig. S14** ESI-MS spectrum of **8a**.



3#134 RT: 0.30 AV: 1 NL: 3.44E3  
T: ITMS + p ESI Full ms [50.00-500.00]

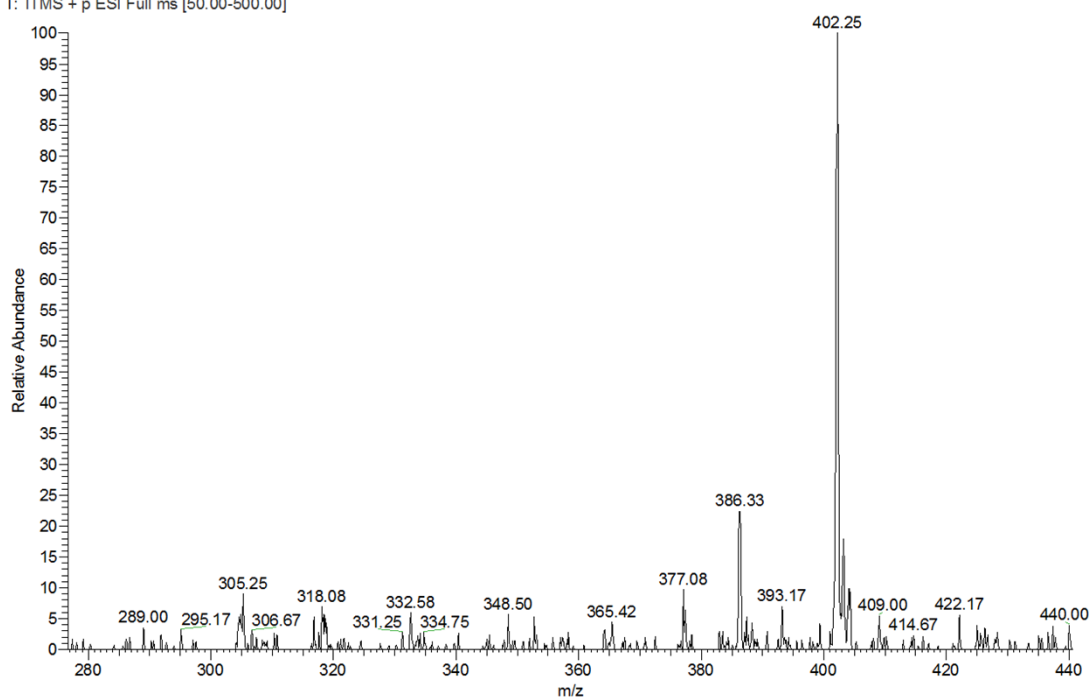

**Fig. S15** ESI-MS spectrum of **8b**.

E1 #134 RT: 0.30 AV: 1 NL: 8.93E3  
T: ITMS + p ESI Full ms [50.00-500.00]

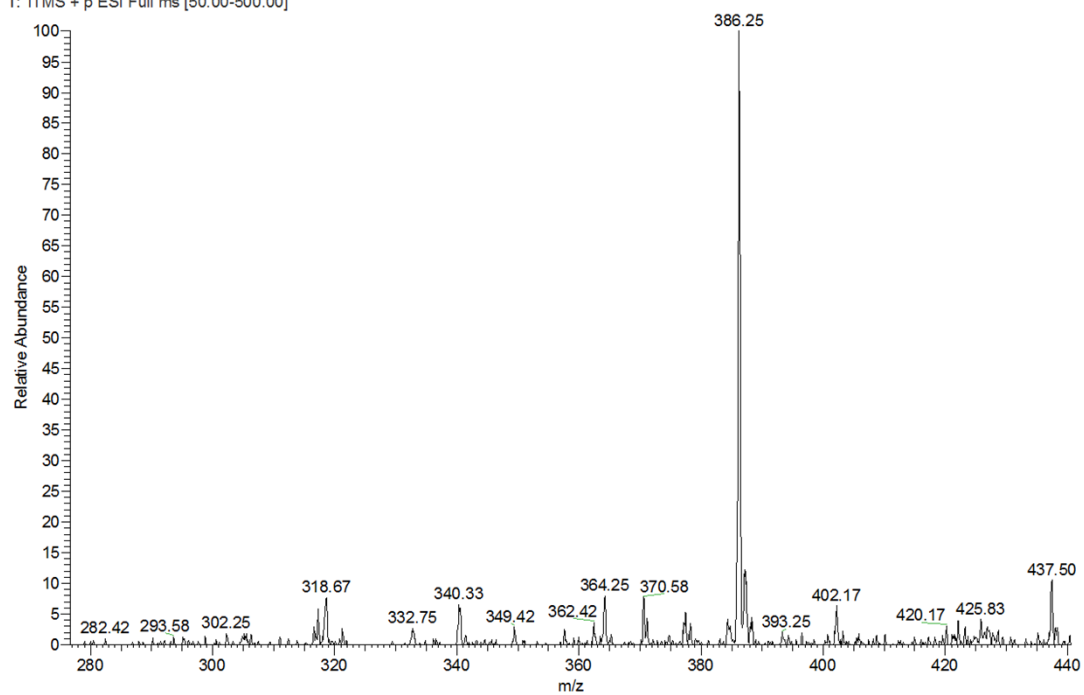

**Fig. S16** ESI-MS spectrum of **8c**.

4 #54 RT: 0.12 AV: 1 NL: 4.54E3  
T: ITMS + p ESI Full ms [50.00-500.00]

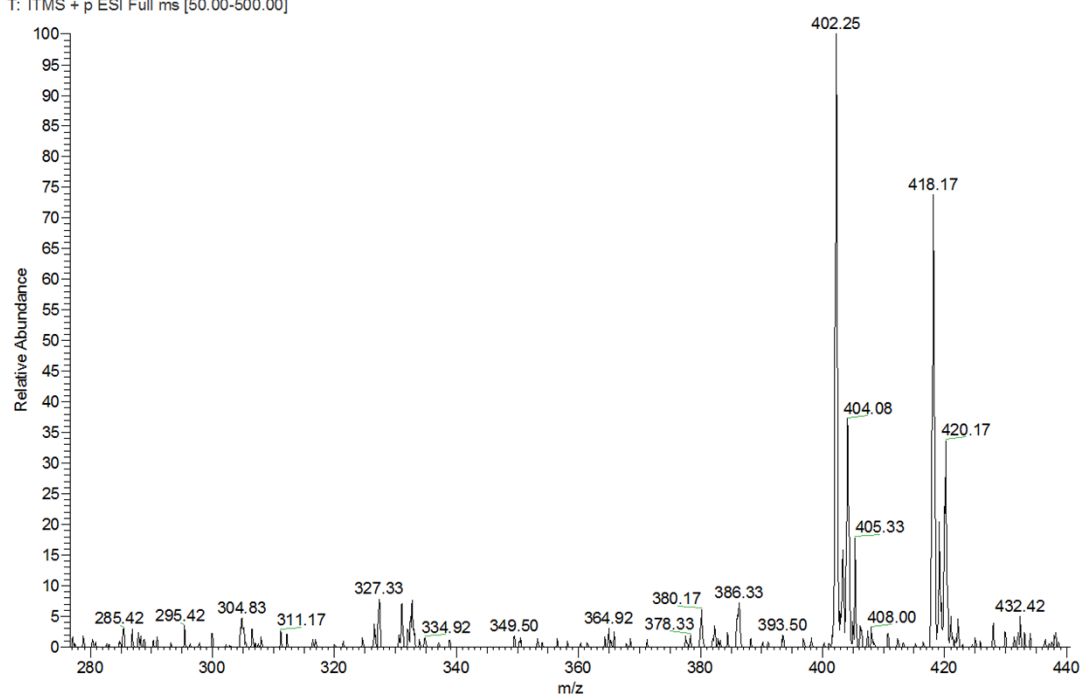

**Fig. S17** ESI-MS spectrum of **8d**.

5 #134 RT: 0.30 AV: 1 NL: 2.73E3  
T: ITMS + p ESI Full ms [50.00-500.00]

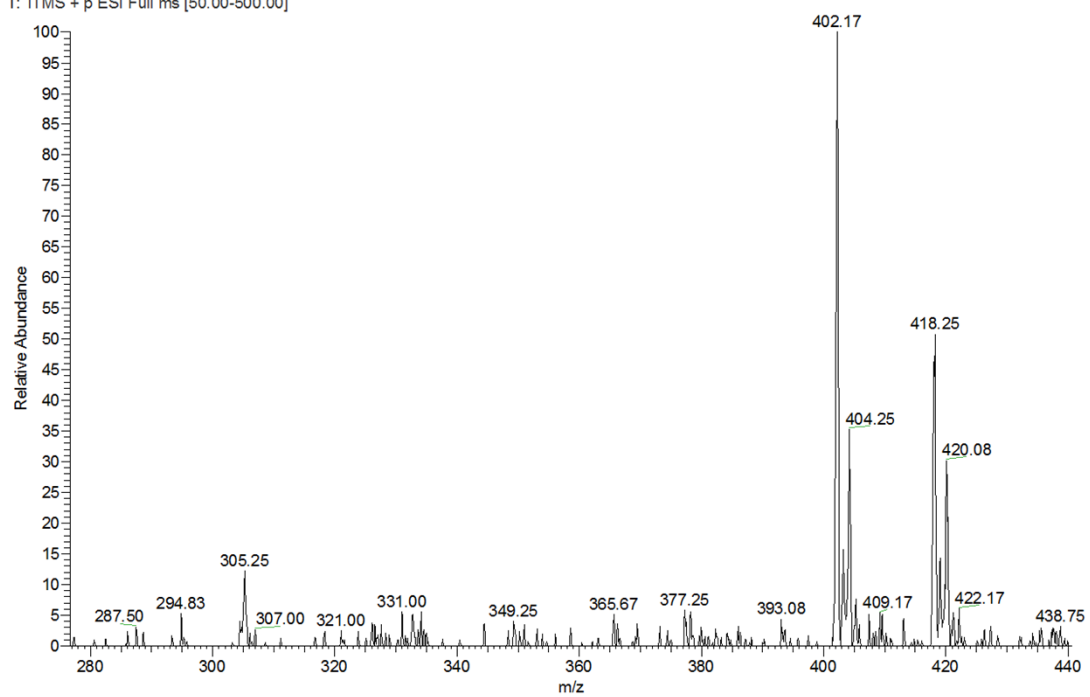

**Fig. S18** ESI-MS spectrum of **8e**.

6#134 RT: 0.30 AV: 1 NL: 2.57E3  
T: ITMS + p ESI Full ms [50.00-500.00]

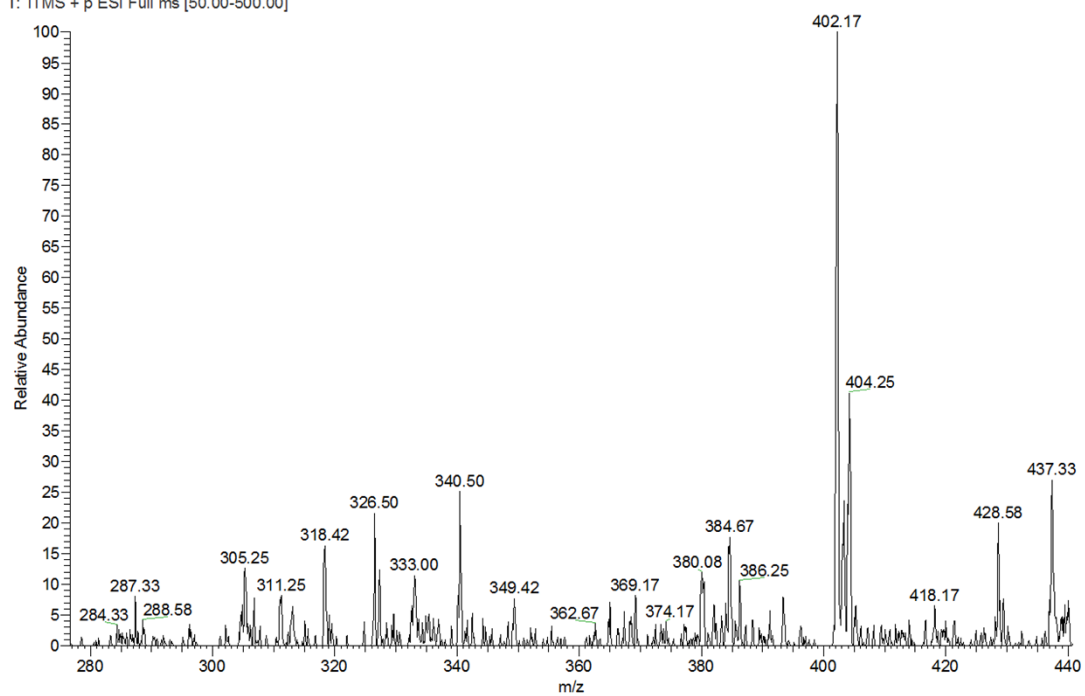

**Fig. S19** ESI-MS spectrum of **8f**.

10 #134 RT: 0.30 AV: 1 NL: 3.57E3  
T: ITMS + p ESI Full ms [50.00-500.00]

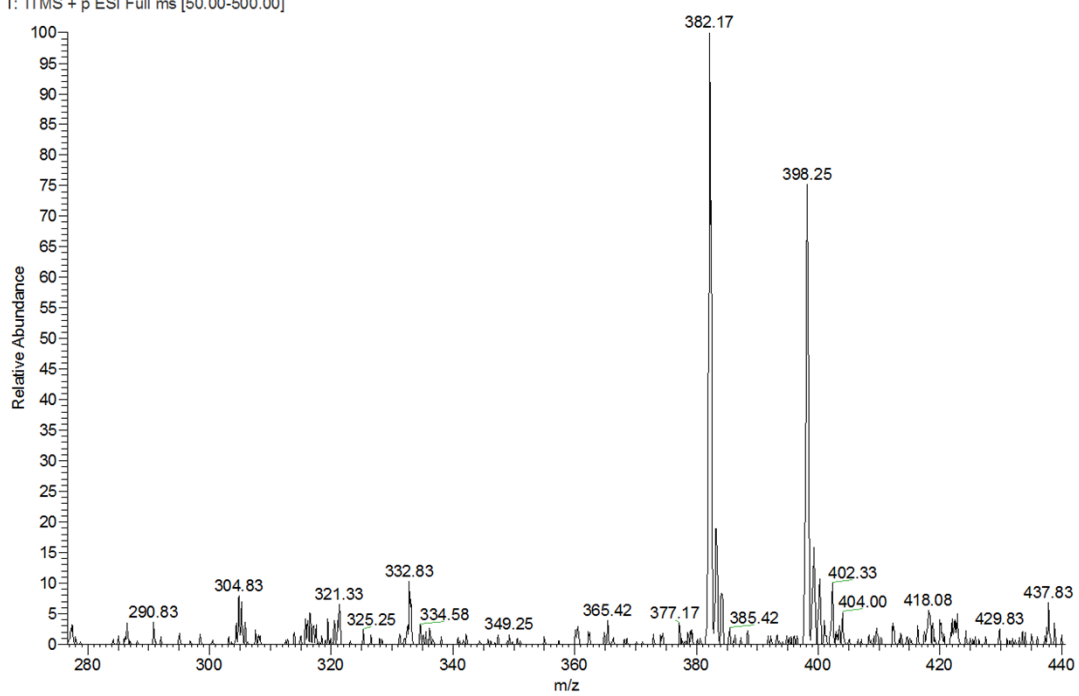

**Fig. S20** ESI-MS spectrum of **8g**.

11 #134 RT: 0.30 AV: 1 NL: 3.85E3  
T: ITMS + p ESI Full ms [50.00-500.00]

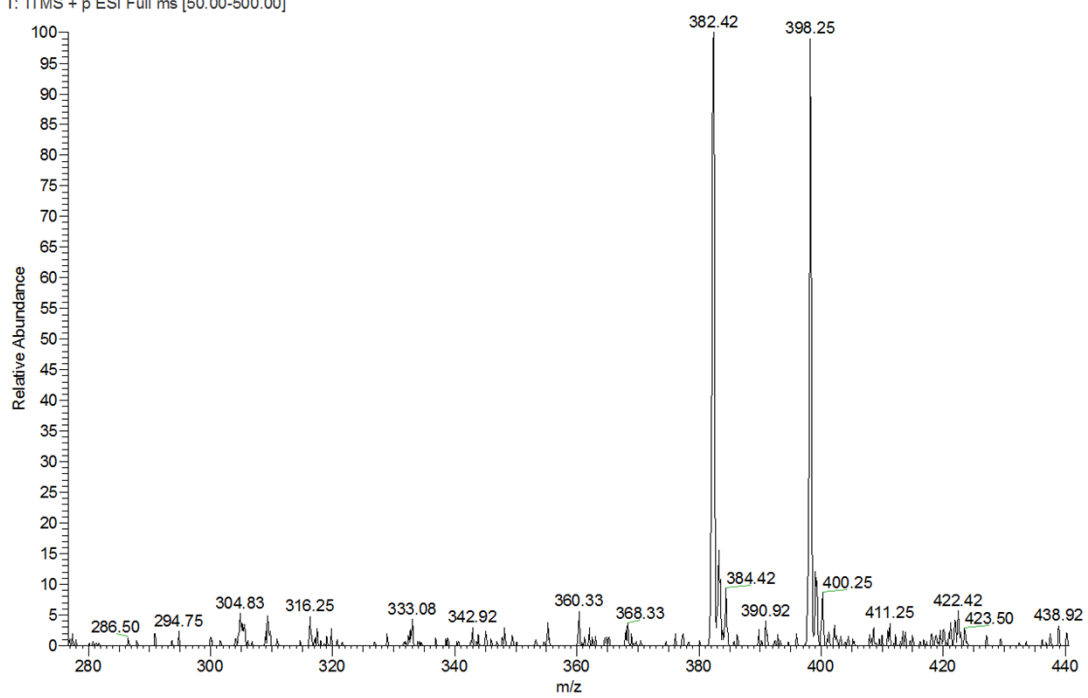

**Fig. S21** ESI-MS spectrum of **8h**.

12 #134 RT: 0.30 AV: 1 NL: 4.20E3  
T: ITMS + p ESI Full ms [50.00-500.00]

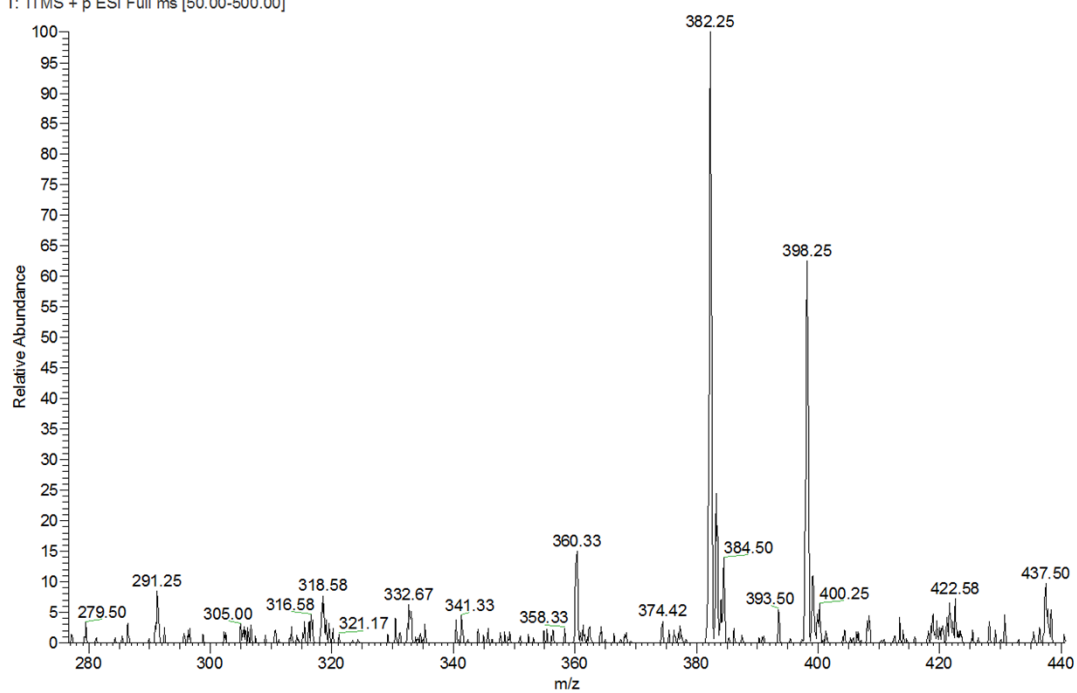

**Fig. S22** ESI-MS spectrum of **8i**.



16 #134 RT: 0.30 AV: 1 NL: 8.07E3  
T: ITMS + p ESI Full ms [50.00-500.00]

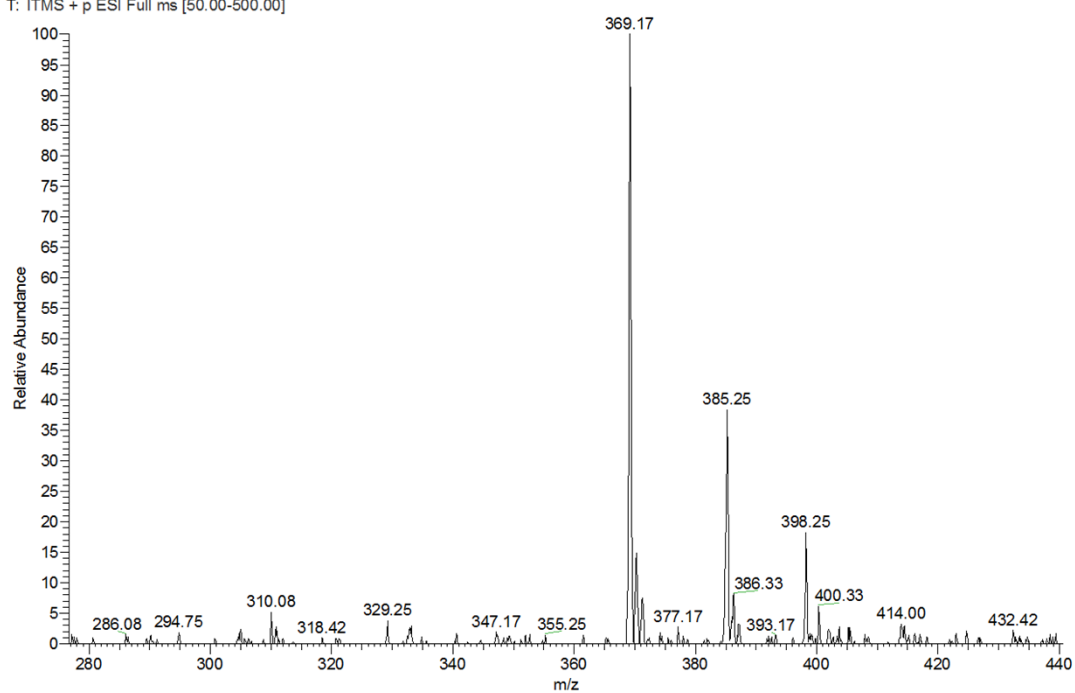

Fig. S23 ESI-MS spectrum of **8j**.

20 #133 RT: 0.30 AV: 1 NL: 5.45E3  
T: ITMS + p ESI Full ms [50.00-500.00]

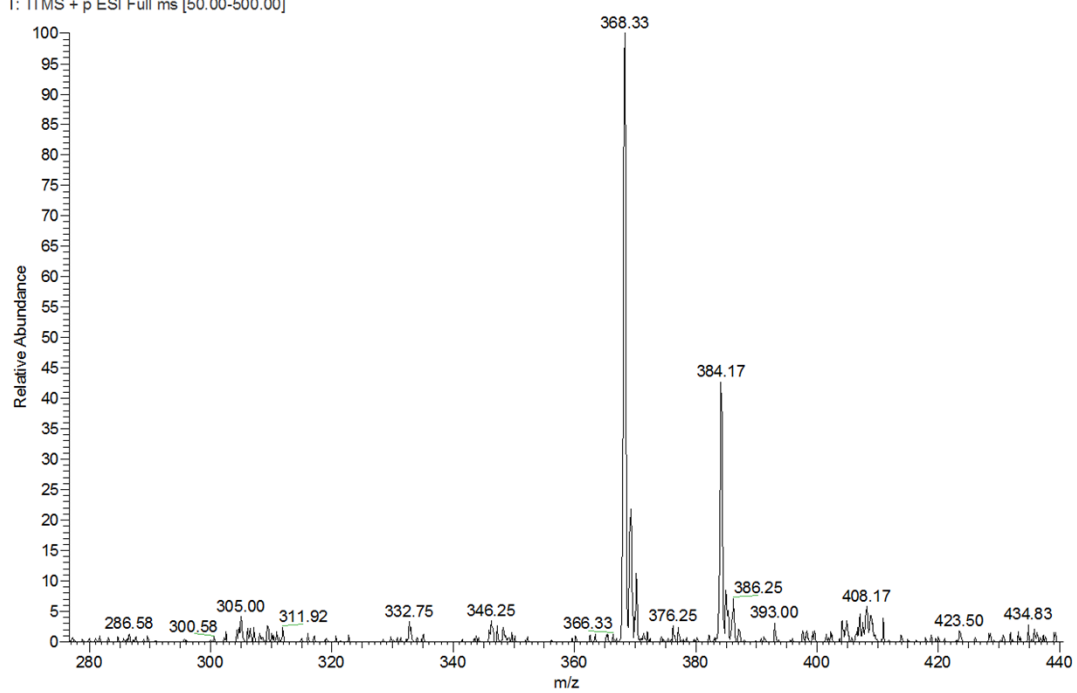

**Fig. S24** ESI-MS spectrum of **8k**.

16 #81 RT: 0.18 AV: 1 NL: 1.40E4  
T: ITMS + p ESI Full ms [50.00-500.00]

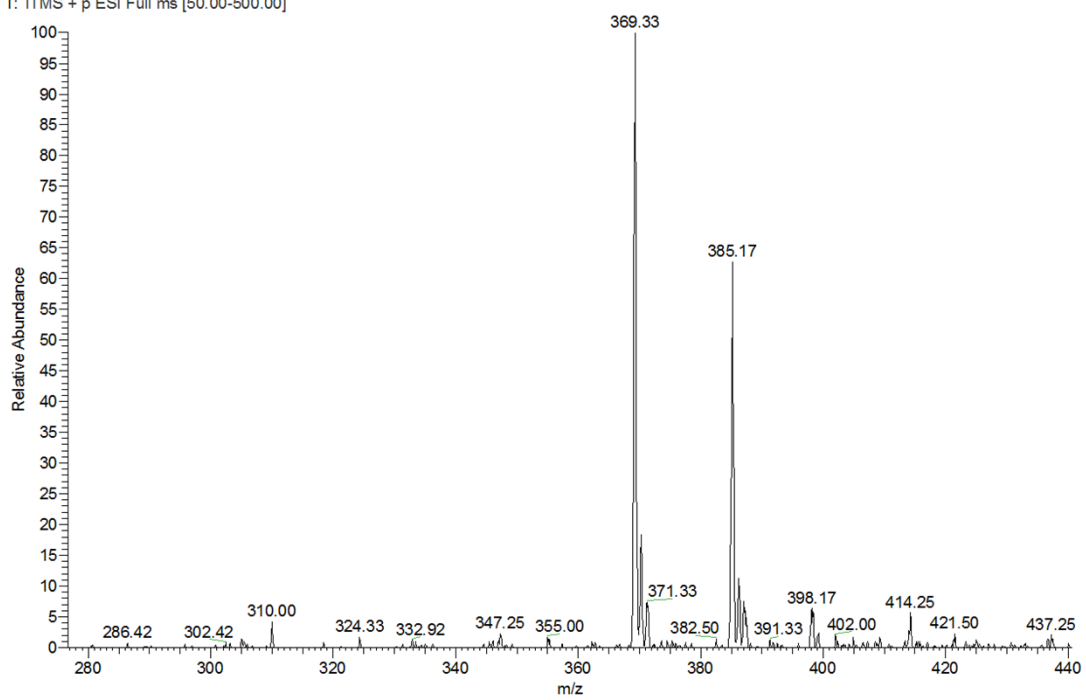

**Fig. S25** ESI-MS spectrum of **81**.
